# Supplementary material for: Triphosphine-supported bimetallic AuI–MI (M = Ag, Cu) alkynyl clusters
Source: Royal Society of Chemistry journal article supplement (doi:10.1039/c3dt52658e), 2014-01-01
Supplement: c3dt52658e.pdf [file c3dt52658e.pdf]

*Supporting information*

**Triphosphine-supported bimetallic Au<sup>I</sup>-M<sup>I</sup> (M = Ag, Cu) alkynyl  
clusters**

Ilya S. Krytchankou,<sup>a</sup> Dmitry V. Krupenya,<sup>a</sup> Antti J. Karttunen,<sup>b</sup> Sergey P. Tunik,<sup>\*a</sup> Tapani  
A. Pakkanen,<sup>c</sup> Pi-Tai Chou<sup>d</sup> and Igor O. Koshevoy<sup>\*c</sup>

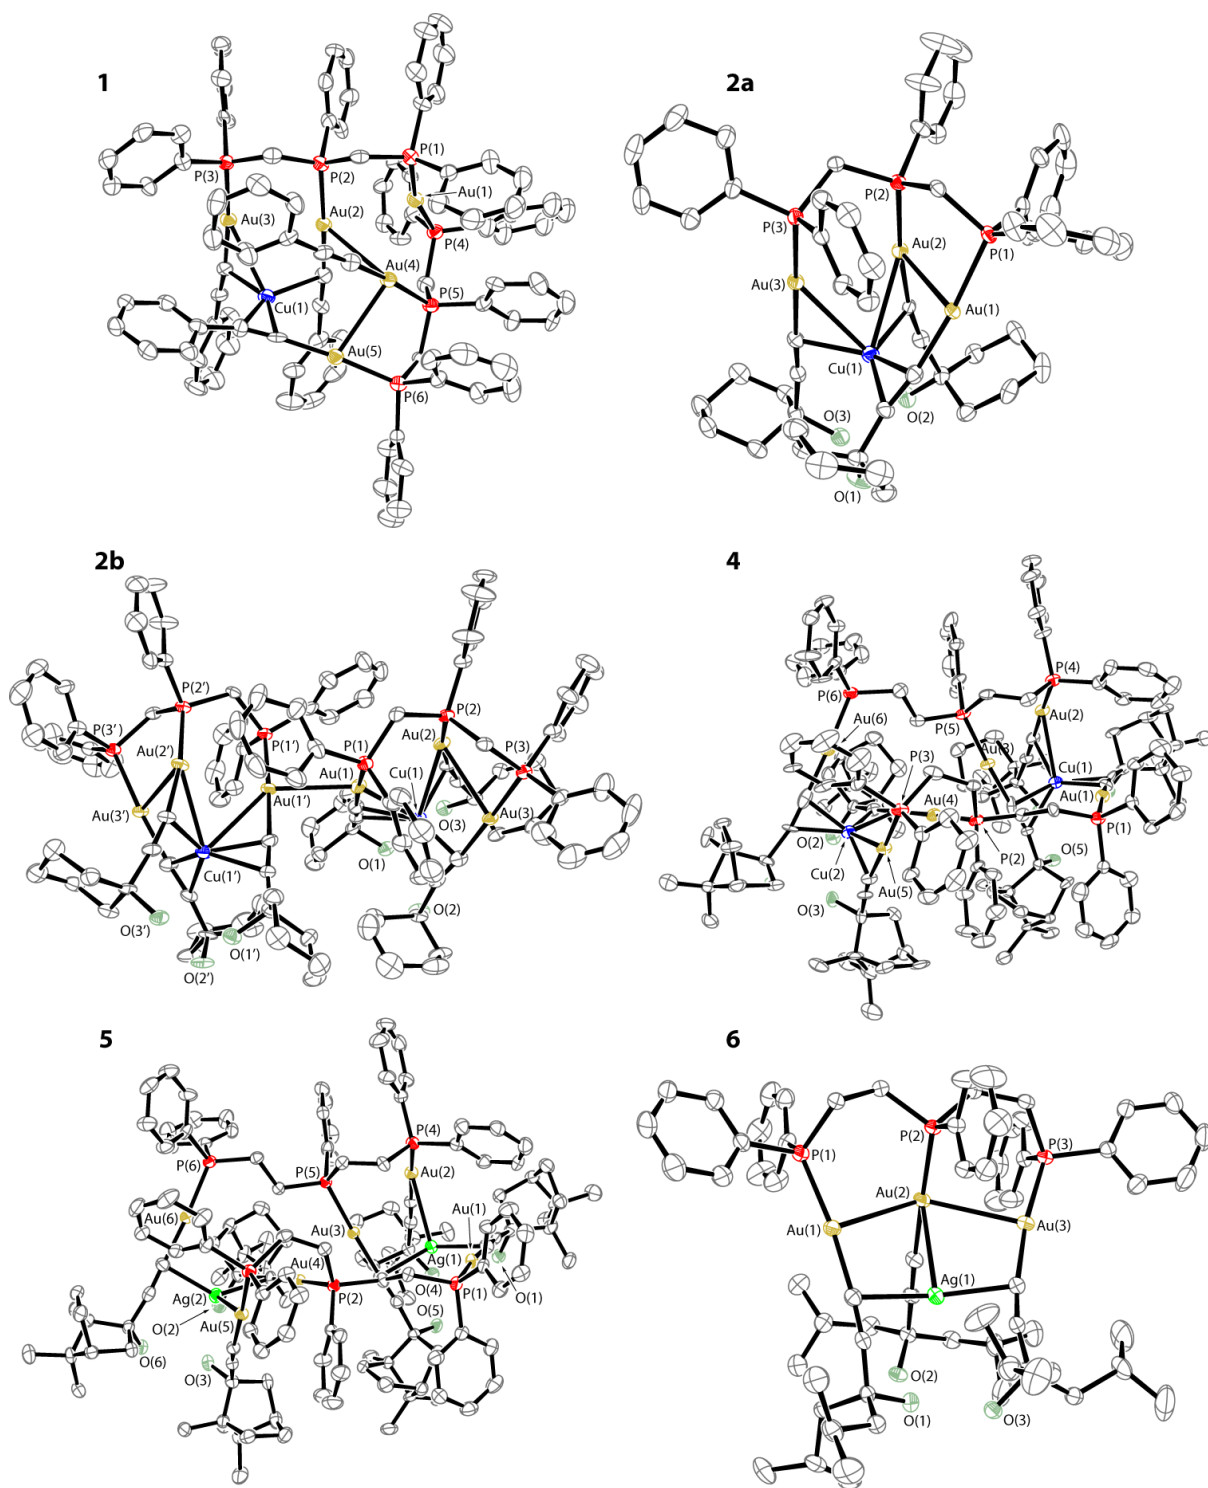

**Figure S1.** ORTEP views of the clusters 1, 2, 4–6.

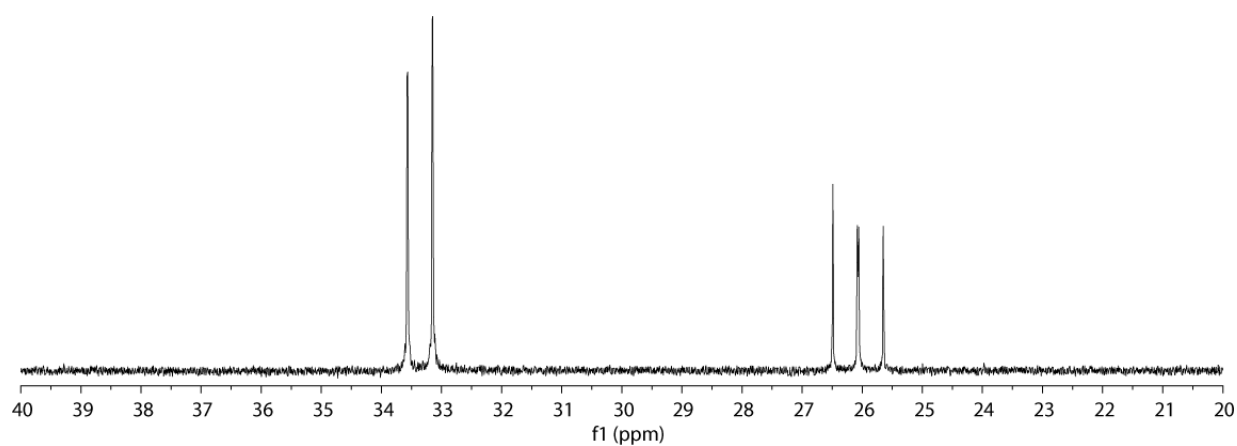

**Figure S2.**  $^{31}\text{P}\{^1\text{H}\}$  NMR spectrum of **2** ( $\text{CD}_2\text{Cl}_2$ , 298 K).

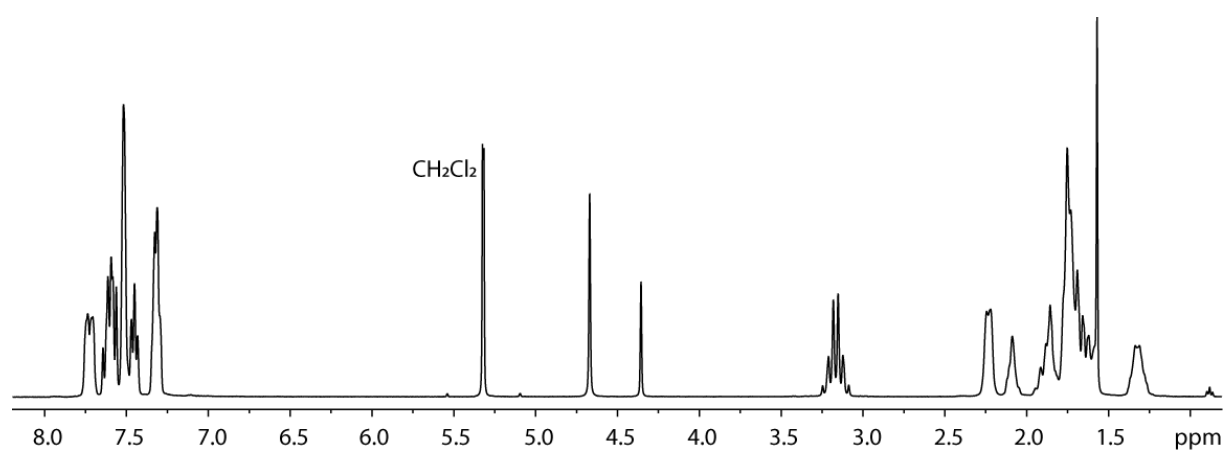

**Figure S3.**  $^1\text{H}$  NMR spectrum of **2** ( $\text{CD}_2\text{Cl}_2$ , 298 K).

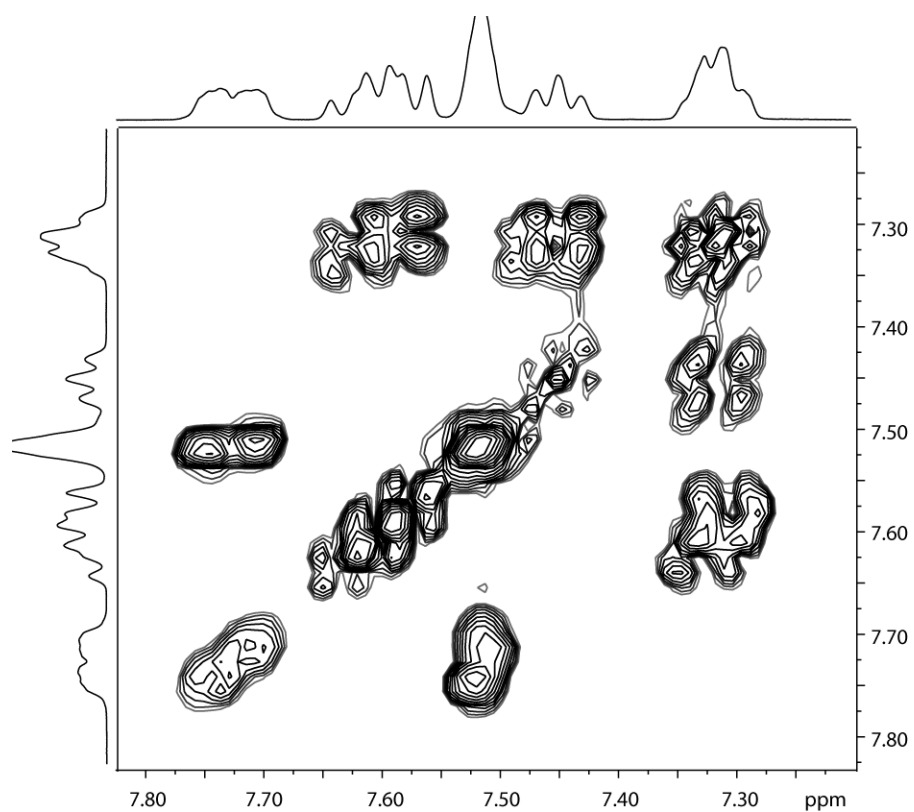

**Figure S4.**  $^1\text{H}$ - $^1\text{H}$  COSY NMR spectrum of **2**, aromatic area, ( $\text{CD}_2\text{Cl}_2$ , 298 K).

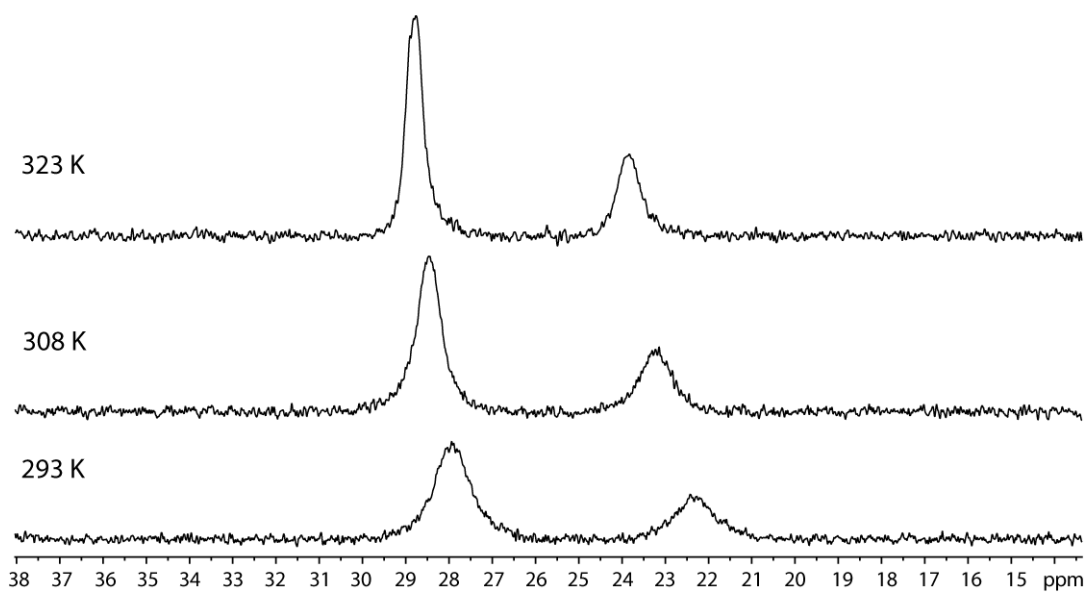

**Figure S5.** VT  $^{31}\text{P}$  NMR spectra of **6** ( $\text{acetone-}d_6$ ).

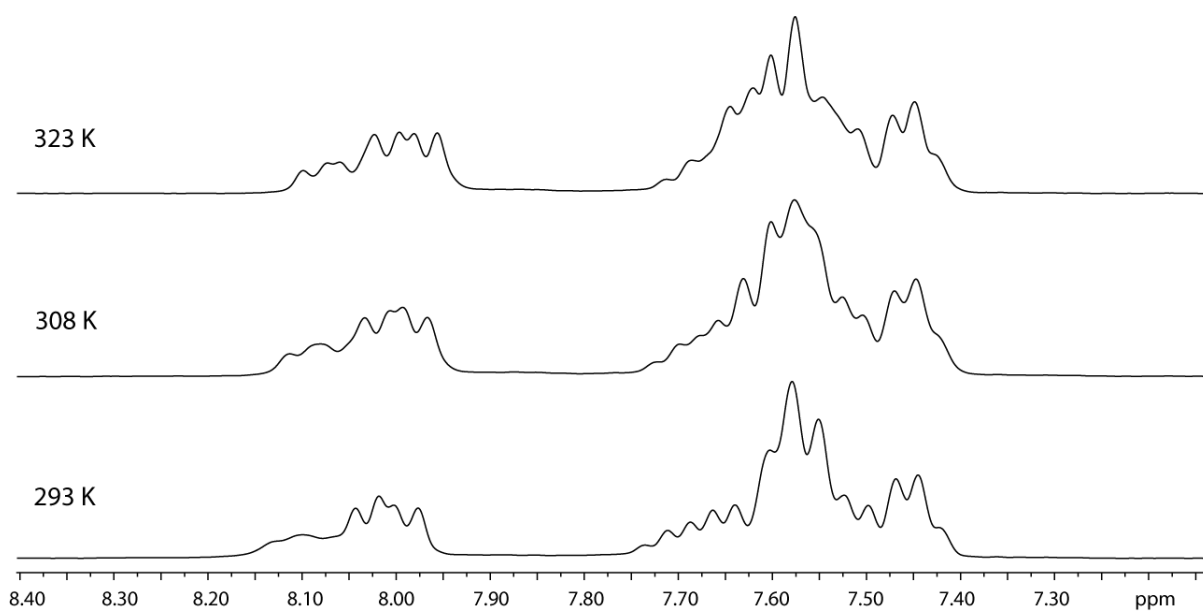

**Figure S6.** VT  $^1\text{H}$  NMR spectra of **6**, aromatic region (acetone- $d_6$ ).

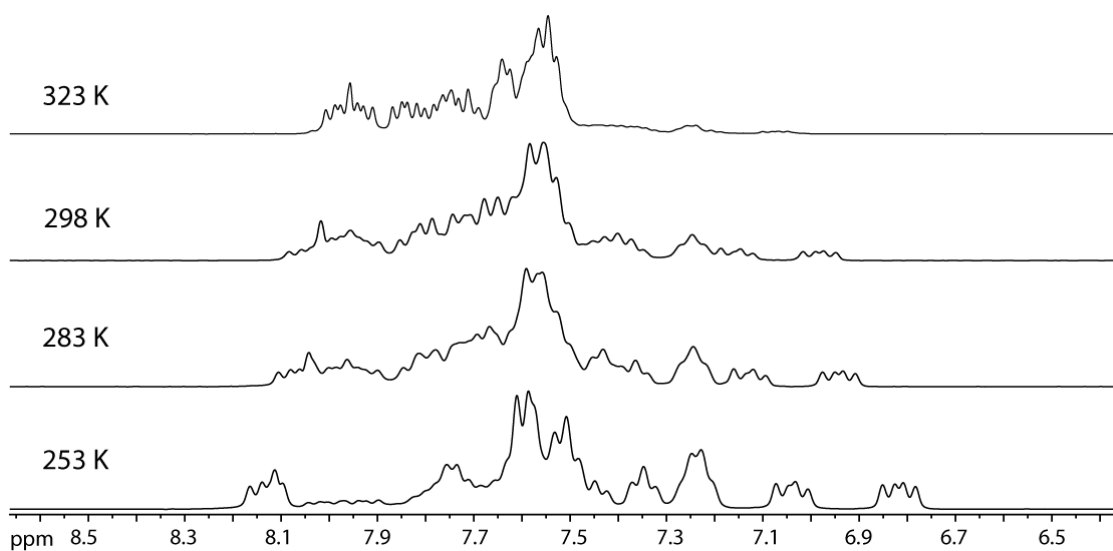

**Figure S7.** VT  $^1\text{H}$  NMR spectra of **4** (acetone- $d_6$ ).

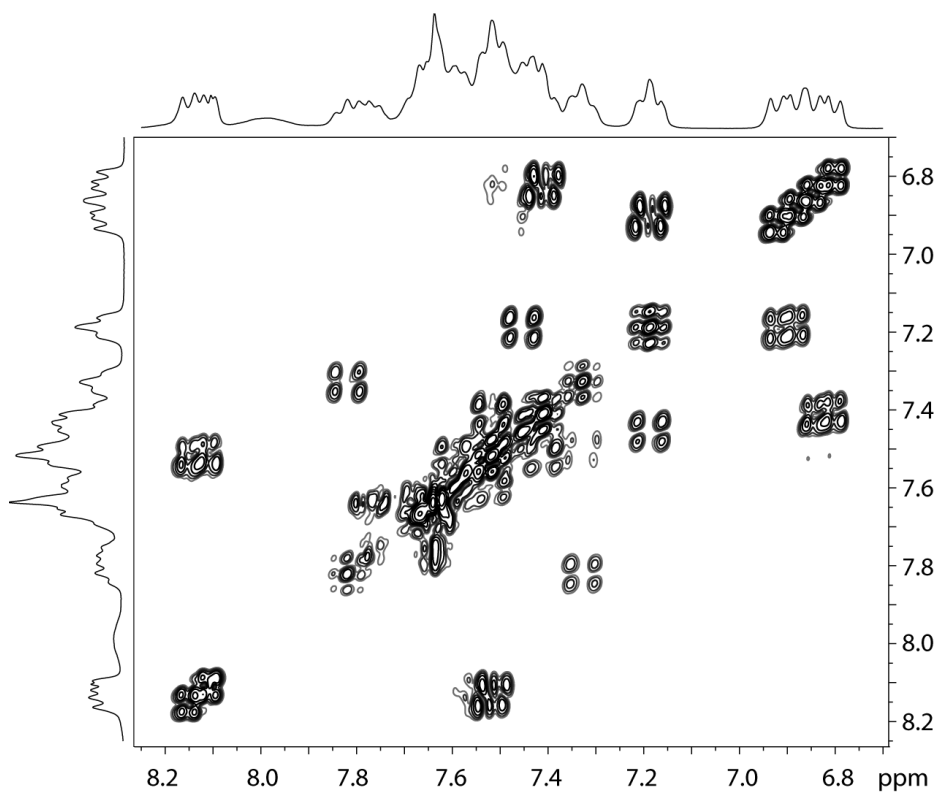

**Figure S8.**  $^1\text{H}$ - $^1\text{H}$  COSY NMR spectrum of **4**, aromatic area, ( $\text{CD}_2\text{Cl}_2$ , 253 K).

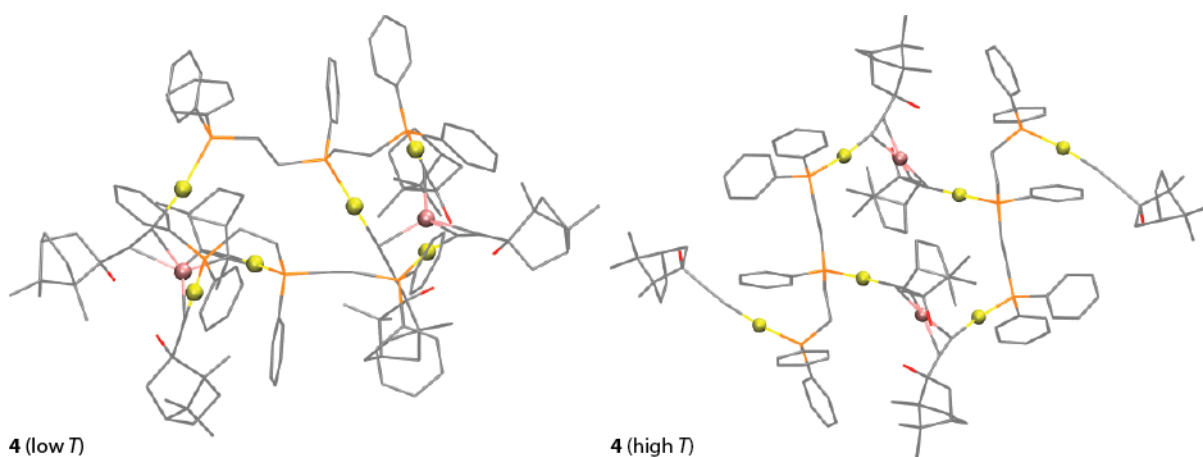

**Figure S9.** Optimized geometry of high-temperature isomeric forms of clusters **4** and **5**. The structural motifs of the two isomers are practically identical in the case of the Ag–Au complex **5**.

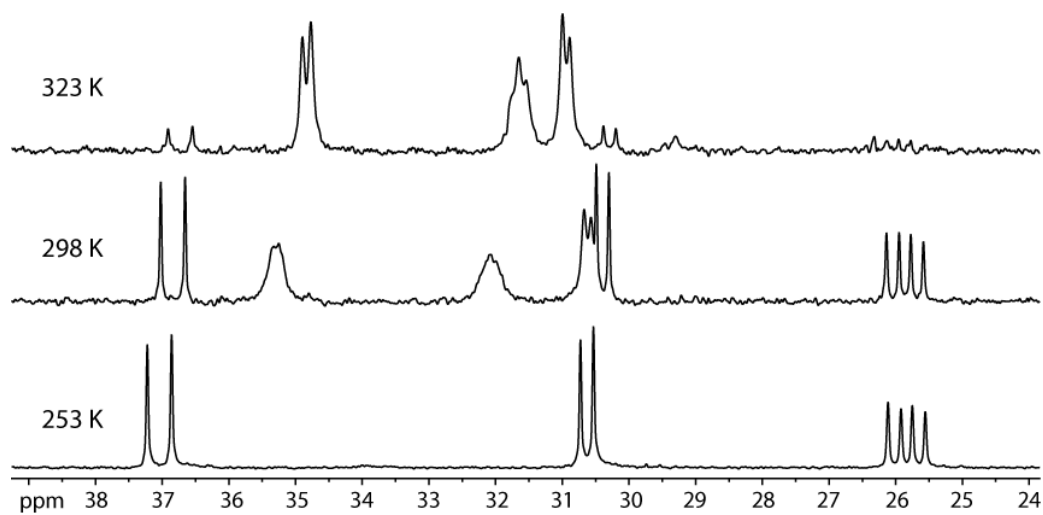

**Figure S10.** VT  $^{31}\text{P}$  NMR spectra of **5** (acetone- $d_6$ ).

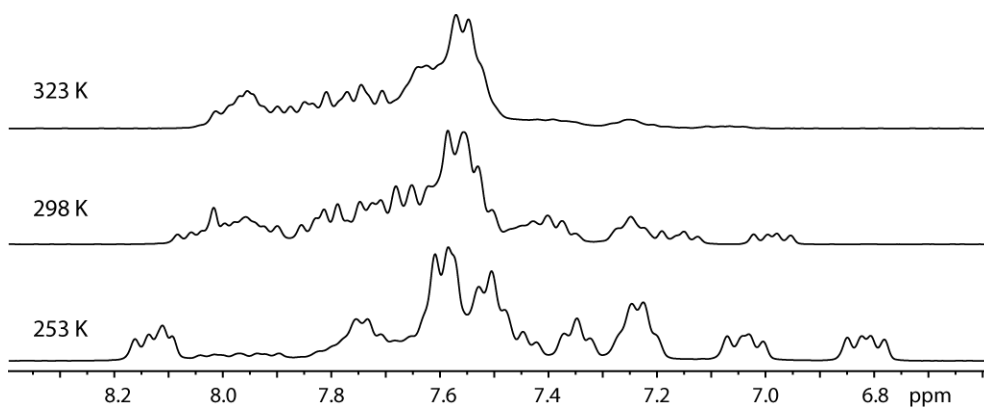

**Figure S11.** VT  $^1\text{P}$  NMR spectra of **5** (acetone- $d_6$ ).

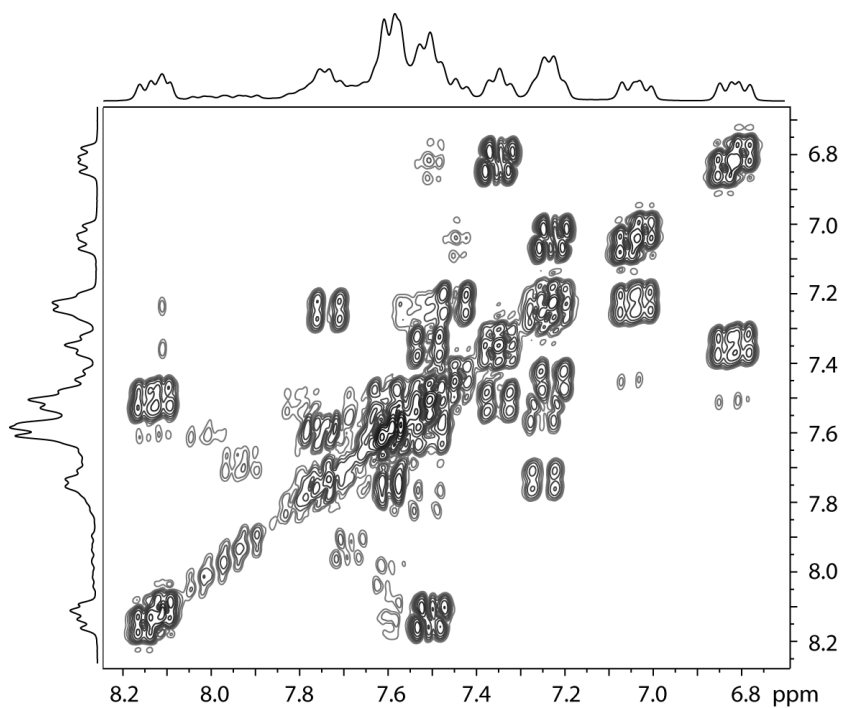

**Figure S12.**  $^1\text{H}$ - $^1\text{H}$  COSY NMR spectrum of **5**, aromatic area, (acetone- $d_6$ , 253 K).

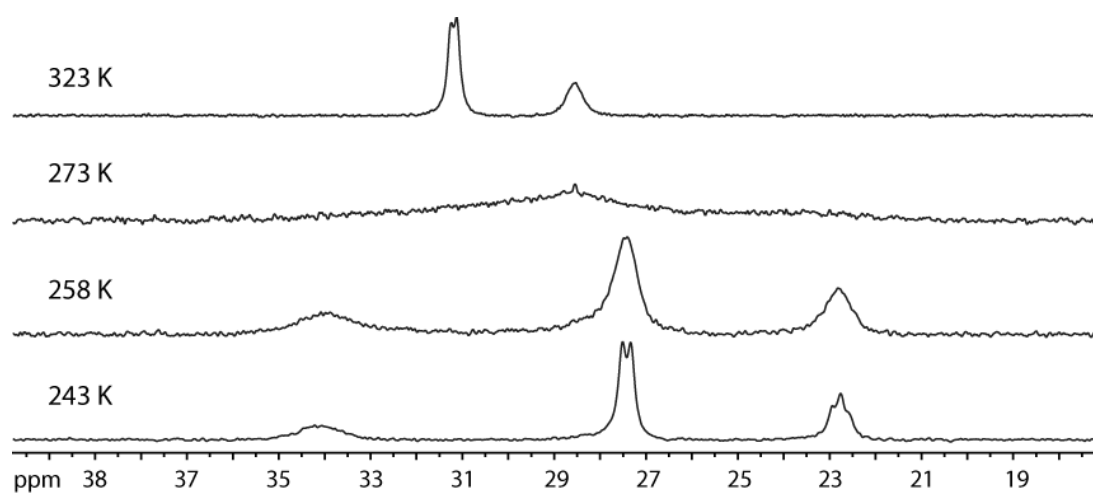

**Figure S13.** VT  $^{31}\text{P}\{^1\text{H}\}$  NMR spectra of **3** (acetone- $d_6$ ).

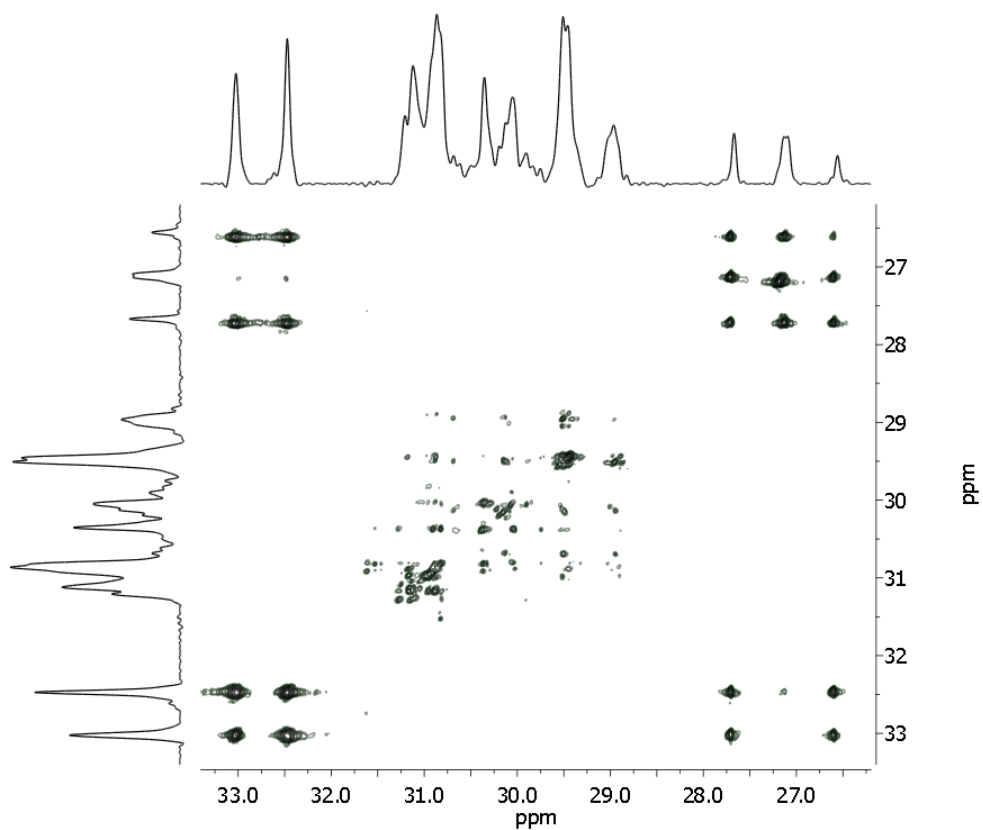

**Figure S14.**  $^{31}\text{P}$ - $^{31}\text{P}$  COSY NMR spectrum of **1** ( $\text{CD}_2\text{Cl}_2$ , 298 K).



### Computational supporting information

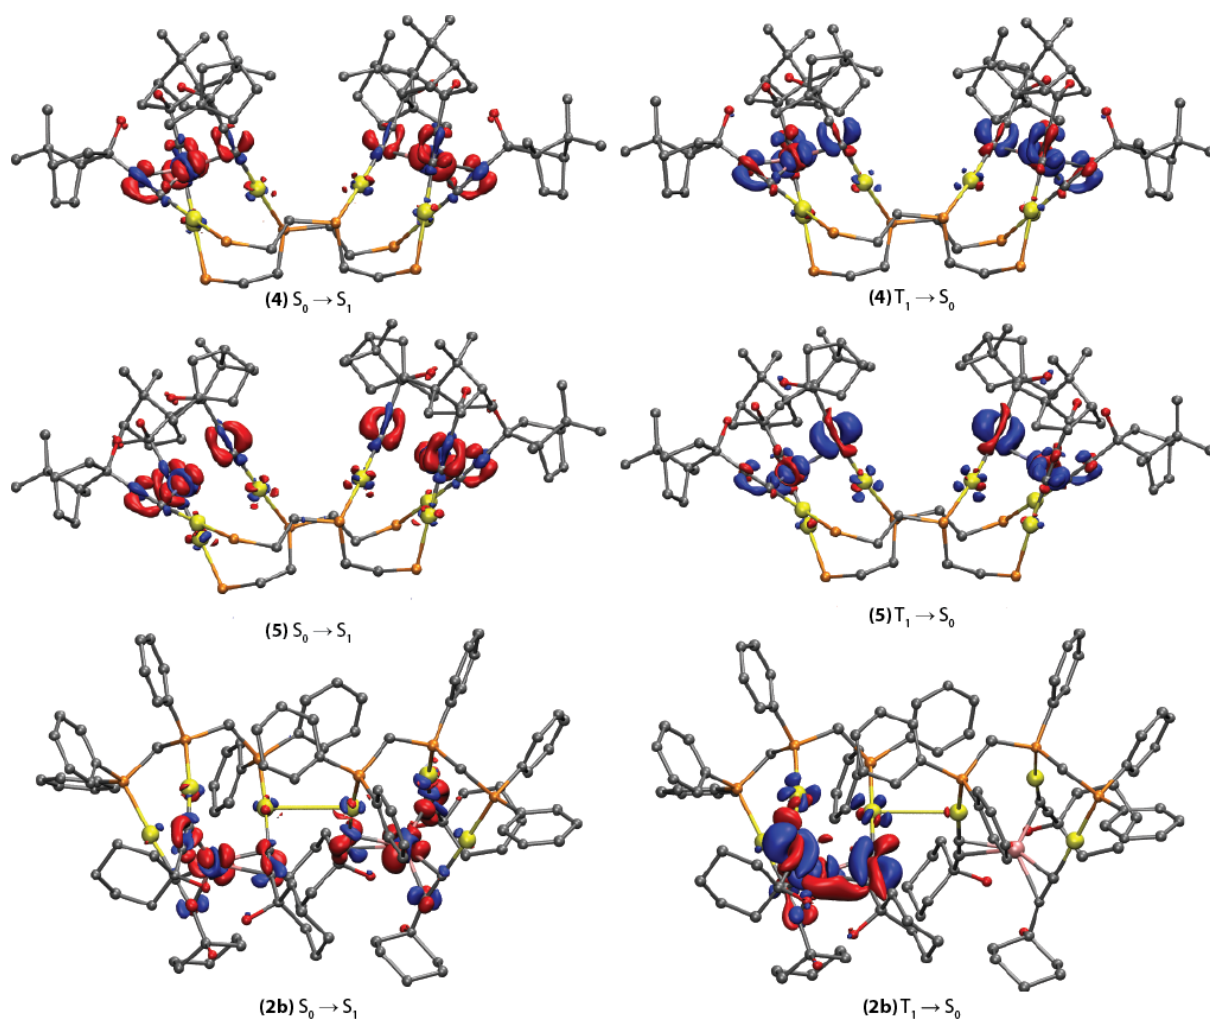

**Figure S15.** Electron density difference plots for the lowest energy singlet excitation ( $S_0 \rightarrow S_1$ ) and the lowest energy triplet emission ( $T_1 \rightarrow S_0$ ) of the  $Au^I-M^I$  complexes **4** and **5**, together with the dimeric structure **2b** (isovalue 0.002 a.u.). During the electronic transition, the electron density increases in the blue areas and decreases in the red areas. Hydrogen atoms and phosphine-based Ph rings omitted for clarity.

## Optimized cartesian coordinates of the studied systems in atomic units (PBE0-DFT)

### [Au<sub>5</sub>Cu(C<sub>2</sub>Ph)<sub>4</sub>(PPh<sub>2</sub>CH<sub>2</sub>PPhCH<sub>2</sub>PPh<sub>2</sub>)<sub>2</sub>]<sup>2+</sup> (1)

|                    |                    |                   |    |
|--------------------|--------------------|-------------------|----|
| 0.0000000000000000 | 0.0000000000000000 | 6.28463744806365  | au |
| 2.18071790025878   | 2.12493966133172   | 0.63038024484073  | au |
| 2.44701777036031   | 4.78476428503334   | -5.30646007944715 | au |
| -2.18071790025878  | -2.12493966133172  | 0.63038024484073  | au |
| -2.44701777036031  | -4.78476428503334  | -5.30646007944715 | au |
| 0.0000000000000000 | 0.0000000000000000 | -8.34103406351140 | cu |
| 2.77636834558382   | -3.42894887745562  | 6.62504226473708  | p  |
| -2.77636834558382  | 3.42894887745562   | 6.62504226473708  | p  |
| 0.33412431287697   | 5.76765658554606   | 2.23872228063654  | p  |
| -0.33412431287697  | -5.76765658554606  | 2.23872228063654  | p  |
| 1.89141984595369   | 8.33073606077678   | -2.81344425681322 | p  |
| -1.89141984595369  | -8.33073606077678  | -2.81344425681322 | p  |
| 2.79369404646488   | -5.37499119306546  | 3.74546232070699  | c  |
| -2.79369404646488  | 5.37499119306546   | 3.74546232070699  | c  |
| -0.49349299311809  | 8.03748771384919   | -0.27545441796251 | c  |
| 0.49349299311809   | -8.03748771384919  | -0.27545441796251 | c  |
| 3.12347768532468   | 2.08874351196421   | -7.88143667182507 | c  |
| -3.12347768532468  | -2.08874351196421  | -7.88143667182507 | c  |
| -3.73966169218979  | -0.63614921618494  | -9.63724054322394 | c  |
| 3.73966169218979   | 0.63614921618494   | -9.63724054322394 | c  |
| -4.01650238925571  | 0.81480962421517   | -0.85713641290765 | c  |
| -5.15786114778232  | 2.56852241878107   | -1.87499480413089 | c  |
| 4.01650238925571   | -0.81480962421517  | -0.85713641290765 | c  |
| 5.15786114778232   | -2.56852241878107  | -1.87499480413089 | c  |
| -0.75487870192444  | -11.01874747000019 | -4.65235019912145 | c  |
| -2.49319129649263  | -12.69093135349098 | -5.74797167937615 | c  |
| 1.83325617966717   | -11.32558104434077 | -5.13009558106494 | c  |
| -1.64579064960821  | -14.66390146275034 | -7.27281913995602 | c  |
| 2.66531293618282   | -13.30843257166309 | -6.65064546885639 | c  |
| 0.93210484249020   | -14.98110119947771 | -7.72057029824567 | c  |
| -4.78658923899695  | -9.38164003175252  | -1.28712301133690 | c  |
| -4.86910501134542  | -11.67859572231659 | 0.03524205030912  | c  |
| -6.96848074861307  | -7.89360002087005  | -1.46114150194347 | c  |
| -7.10802322825000  | -12.46853261197211 | 1.16561311988441  | c  |
| -9.21058582576368  | -8.69697747522915  | -0.32977626817547 | c  |
| -9.28118870567162  | -10.98034401790704 | 0.97964045907389  | c  |
| 0.75487870192444   | 11.01874747000019  | -4.65235019912145 | c  |
| 2.49319129649263   | 12.69093135349098  | -5.74797167937615 | c  |
| -1.83325617966717  | 11.32558104434077  | -5.13009558106494 | c  |
| 1.64579064960821   | 14.66390146275034  | -7.27281913995602 | c  |
| -2.66531293618282  | 13.30843257166309  | -6.65064546885639 | c  |
| -0.93210484249020  | 14.98110119947771  | -7.72057029824567 | c  |
| 4.78658923899695   | 9.38164003175252   | -1.28712301133690 | c  |
| 4.86910501134542   | 11.67859572231659  | 0.03524205030912  | c  |
| 6.96848074861307   | 7.89360002087005   | -1.46114150194347 | c  |
| 7.10802322825000   | 12.46853261197211  | 1.16561311988441  | c  |
| 9.21058582576368   | 8.69697747522915   | -0.32977626817547 | c  |
| 9.28118870567162   | 10.98034401790704  | 0.97964045907389  | c  |
| -2.24613229566003  | -7.50153811213884  | 4.51340766045966  | c  |
| -1.37460851342293  | -9.75235799900865  | 5.60978494338053  | c  |
| -4.61919705230521  | -6.55367268367365  | 5.19755114731096  | c  |
| -2.85945865516644  | -11.03257785903435 | 7.36202691562799  | c  |
| -6.10337975551882  | -7.84266082804896  | 6.95471590340480  | c  |
| -5.22690919244529  | -10.07812889919573 | 8.03528786954537  | c  |
| 2.24613229566003   | 7.50153811213884   | 4.51340766045966  | c  |
| 1.37460851342293   | 9.75235799900865   | 5.60978494338053  | c  |
| 4.61919705230521   | 6.55367268367365   | 5.19755114731096  | c  |
| 2.85945865516644   | 11.03257785903435  | 7.36202691562799  | c  |
| 6.10337975551882   | 7.84266082804896   | 6.95471590340480  | c  |
| 5.22690919244529   | 10.07812889919573  | 8.03528786954537  | c  |
| 2.05364956380138   | -5.55292291014551  | 9.22863638123397  | c  |
| 3.64877704465648   | -7.61110620858843  | 9.73673791408091  | c  |
| -0.07124110044239  | -5.14070913492913  | 10.74751947187918 | c  |
| 3.11272827824489   | -9.23262552778438  | 11.73709305589697 | c  |
| -0.60225755412453  | -6.77252450365606  | 12.74910463023814 | c  |
| 0.98622535214737   | -8.81371845518927  | 13.24484947493302 | c  |
| 6.04910513381178   | -2.44305202538730  | 7.10414762273787  | c  |
| 7.51452921600519   | -1.58867015956816  | 5.06688466920509  | c  |
| 7.05099021523506   | -2.36961869946645  | 9.55685336809841  | c  |
| 9.96831352226404   | -0.72394318884456  | 5.48557795297912  | c  |
| 9.50222726612460   | -1.49144325545094  | 9.95751676706912  | c  |

|                    |                    |                    |   |
|--------------------|--------------------|--------------------|---|
| 10.96838904854591  | -0.67687520514950  | 7.92454752732727   | c |
| -6.04910513381178  | 2.44305202538730   | 7.10414762273787   | c |
| -7.05099021523506  | 2.36961869946645   | 9.55685336809841   | c |
| -7.51452921600519  | 1.58867015956816   | 5.06688466920509   | c |
| -9.50222726612460  | 1.49144325545094   | 9.95751676706912   | c |
| -9.96831352226404  | 0.72394318884456   | 5.48557795297912   | c |
| -10.96838904854591 | 0.67687520514950   | 7.92454752732727   | c |
| -2.05364956380138  | 5.55292291014551   | 9.22863638123397   | c |
| -3.64877704465648  | 7.61110620858843   | 9.73673791408091   | c |
| 0.07124110044239   | 5.14070913492913   | 10.74751947187918  | c |
| -3.11272827824489  | 9.23262552778438   | 11.73709305589697  | c |
| 0.60225755412453   | 6.77252450365606   | 12.74910463023814  | c |
| -0.98622535214737  | 8.81371845518927   | 13.24484947493302  | c |
| 4.93820980138812   | -0.78811652209993  | -11.61405249553230 | c |
| 7.51725763385477   | -0.37406847289615  | -12.11498452354423 | c |
| 3.60696275922320   | -2.57836102299944  | -13.05576595551300 | c |
| 8.72294608493616   | -1.72335469237220  | -14.02147146551521 | c |
| 4.83018180166077   | -3.92044990001471  | -14.95876662186271 | c |
| 7.38713352893485   | -3.49703911456652  | -15.44702253386908 | c |
| -4.93820980138812  | 0.78811652209993   | -11.61405249553230 | c |
| -7.51725763385477  | 0.37406847289615   | -12.11498452354423 | c |
| -3.60696275922320  | 2.57836102299944   | -13.05576595551300 | c |
| -8.72294608493616  | 1.72335469237220   | -14.02147146551521 | c |
| -4.83018180166077  | 3.92044990001471   | -14.95876662186271 | c |
| -7.38713352893485  | 3.49703911456652   | -15.44702253386908 | c |
| 6.44932869015672   | -4.61447794653994  | -3.08089426089311  | c |
| 6.24419641239866   | -4.97094709802936  | -5.71080908987533  | c |
| 7.94539094144195   | -6.31616633217068  | -1.68085630293236  | c |
| 7.50003965168145   | -6.95527096043277  | -6.89592178089896  | c |
| 9.18620847146301   | -8.30585765634138  | -2.87598041685523  | c |
| 8.97200412633135   | -8.63128930870494  | -5.48557562164491  | c |
| -6.44932869015672  | 4.61447794653994   | -3.08089426089311  | c |
| -6.24419641239866  | 4.97094709802936   | -5.71080908987533  | c |
| -7.94539094144195  | 6.31616633217068   | -1.68085630293236  | c |
| -7.50003965168145  | 6.95527096043277   | -6.89592178089896  | c |
| -9.18620847146301  | 8.30585765634138   | -2.87598041685523  | c |
| -8.97200412633135  | 8.63128930870494   | -5.48557562164491  | c |
| -9.97219665358321  | 10.17961030998308  | -6.42215413423823  | h |
| -3.68068949590401  | 7.22271120916422   | 4.13710627117987   | h |
| -3.93182825619787  | 4.35883474217390   | 2.31563625701756   | h |
| 3.68068949590401   | -7.22271120916422  | 4.13710627117987   | h |
| 3.93182825619787   | -4.35883474217390  | 2.31563625701756   | h |
| -2.23948437293790  | 7.31302466694308   | -1.16656821373344  | h |
| -0.90011351828461  | 9.91659143330926   | 0.53700055661261   | h |
| 2.23948437293790   | -7.31302466694308  | -1.16656821373344  | h |
| 0.90011351828461   | -9.91659143330926  | 0.53700055661261   | h |
| -4.51995123377551  | -12.46318209608512 | -5.40970213167687  | h |
| 3.23377080314912   | -10.02066315026821 | -4.34724619190213  | h |
| -3.01459676692129  | -15.96384362300934 | -8.11463296577492  | h |
| 4.68918390387613   | -13.53706599955719 | -7.00335169977146  | h |
| 1.59168339142427   | -16.53553372561066 | -8.91289149549200  | h |
| -3.18943383631884  | -12.88048785920070 | 0.15634406984964   | h |
| -6.91750586668350  | -6.10303213078749  | -2.49720495115627  | h |
| -7.16617800113784  | -14.26713205267959 | 2.18229700166882   | h |
| -10.91344792817119 | -7.53731524060065  | -0.49393623926000  | h |
| -11.04423933616792 | -11.61952832526921 | 1.85020882088196   | h |
| 4.51995123377551   | 12.46318209608512  | -5.40970213167687  | h |
| -3.23377080314912  | 10.02066315026821  | -4.34724619190213  | h |
| 3.01459676692129   | 15.96384362300934  | -8.11463296577492  | h |
| -4.68918390387613  | 13.53706599955719  | -7.00335169977146  | h |
| -1.59168339142427  | 16.53553372561066  | -8.91289149549200  | h |
| 3.18943383631884   | 12.88048785920070  | 0.15634406984964   | h |
| 6.91750586668350   | 6.10303213078749   | -2.49720495115627  | h |
| 7.16617800113784   | 14.26713205267959  | 2.18229700166882   | h |
| 10.91344792817119  | 7.53731524060065   | -0.49393623926000  | h |
| 11.04423933616792  | 11.61952832526921  | 1.85020882088196   | h |
| 0.47974965254562   | -10.52713152617449 | 5.11461923263110   | h |
| -5.31210371698787  | -4.80094862861757  | 4.34305212837065   | h |
| -2.16622451477704  | -12.78491280315235 | 8.21097753725310   | h |
| -7.95798155388653  | -7.09159112574287  | 7.47265429028762   | h |
| -6.39189614093166  | -11.08949006295931 | 9.41186628431710   | h |
| -0.47974965254562  | 10.52713152617449  | 5.11461923263110   | h |
| 5.31210371698787   | 4.80094862861757   | 4.34305212837065   | h |
| 2.16622451477704   | 12.78491280315235  | 8.21097753725310   | h |
| 7.95798155388653   | 7.09159112574287   | 7.47265429028762   | h |
| 6.39189614093166   | 11.08949006295931  | 9.41186628431710   | h |
| 5.34381331679452   | -7.93532204121581  | 8.59387508053058   | h |

|                    |                    |                    |   |
|--------------------|--------------------|--------------------|---|
| -1.32039686654113  | -3.53648038572840  | 10.36365930240931  | h |
| 4.37060323630595   | -10.82399071600832 | 12.13526488473336  | h |
| -2.26388455679608  | -6.43806846005308  | 13.93139173416755  | h |
| 0.57614791635954   | -10.08373293910368 | 14.82380933240204  | h |
| 6.76222820674052   | -1.56278418438289  | 3.13906819402011   | h |
| 5.92834502979777   | -3.01496367693442  | 11.16768603494945  | h |
| 11.10575044197228  | -0.08860104909000  | 3.88049133670278   | h |
| 10.27366330053671  | -1.46001531896671  | 11.87502902376187  | h |
| 12.89868289372648  | -0.00839375772284  | 8.24264343066851   | h |
| -5.92834502979777  | 3.01496367693442   | 11.16768603494945  | h |
| -6.76222820674052  | 1.56278418438289   | 3.13906819402011   | h |
| -10.27366330053671 | 1.46001531896671   | 11.87502902376187  | h |
| -11.10575044197228 | 0.08860104909000   | 3.88049133670278   | h |
| -12.89868289372648 | 0.00839375772284   | 8.24264343066851   | h |
| -5.34381331679452  | 7.93532204121581   | 8.59387508053058   | h |
| 1.32039686654113   | 3.53648038572840   | 10.36365930240931  | h |
| -4.37060323630595  | 10.82399071600832  | 12.13526488473336  | h |
| 2.26388455679608   | 6.43806846005308   | 13.93139173416755  | h |
| -0.57614791635954  | 10.08373293910368  | 14.82380933240204  | h |
| 8.55755116376500   | 1.01709763387619   | -10.99809888117096 | h |
| 1.59806832336939   | -2.90505803054376  | -12.68219085982098 | h |
| 10.72564269247657  | -1.38304956995352  | -14.40394456954687 | h |
| 3.77397416139662   | -5.30036584787844  | -16.07762391418607 | h |
| 8.34178946148312   | -4.54705968182182  | -16.95009596406825 | h |
| -8.55755116376500  | -1.01709763387619  | -10.99809888117096 | h |
| -1.59806832336939  | 2.90505803054376   | -12.68219085982098 | h |
| -10.72564269247657 | 1.38304956995352   | -14.40394456954687 | h |
| -3.77397416139662  | 5.30036584787844   | -16.07762391418607 | h |
| -8.34178946148312  | 4.54705968182182   | -16.95009596406825 | h |
| 5.10680039115954   | -3.64741921482858  | -6.81557027064622  | h |
| 8.16217997479093   | -6.04173414269225  | 0.35719550239772   | h |
| 7.33603018370258   | -7.18339425874197  | -8.94438245412141  | h |
| 10.35777685614837  | -9.59819625508515  | -1.76566767479687  | h |
| 9.97219665358321   | -10.17961030998308 | -6.42215413423823  | h |
| -5.10680039115954  | 3.64741921482858   | -6.81557027064622  | h |
| -8.16217997479093  | 6.04173414269225   | 0.35719550239772   | h |
| -7.33603018370258  | 7.18339425874197   | -8.94438245412141  | h |
| -10.35777685614837 | 9.59819625508515   | -1.76566767479687  | h |

**[Au<sub>3</sub>Cu(C<sub>2</sub>C<sub>6</sub>H<sub>11</sub>O)<sub>3</sub>(Ph<sub>2</sub>PCH<sub>2</sub>PPhCH<sub>2</sub>PPh<sub>2</sub>)]<sup>2+</sup> (2a)**

|                   |                    |                    |    |
|-------------------|--------------------|--------------------|----|
| 0.91960103883164  | -1.56732783933484  | -4.71003858525225  | au |
| -1.46008153660989 | -3.61723342484597  | 0.00000000000000   | au |
| 0.91960103883164  | -1.56732783933484  | 4.71003858525225   | au |
| -1.17926546322912 | 2.77561428076625   | 0.00000000000000   | cu |
| 1.72405775919493  | -5.78838612868929  | 5.69057619865626   | p  |
| 2.40080377005954  | -5.68249282580237  | 0.00000000000000   | p  |
| 1.72405775919493  | -5.78838612868929  | -5.69057619865626  | p  |
| 2.70132751371336  | -7.68294640527392  | 2.84388269709815   | c  |
| 2.70132751371336  | -7.68294640527392  | -2.84388269709815  | c  |
| 0.19900031553405  | 2.06841188993843   | -3.89297207555670  | c  |
| -4.63635884260430 | -1.62732004511473  | 0.00000000000000   | c  |
| 0.19900031553405  | 2.06841188993843   | 3.89297207555670   | c  |
| -0.34183527963763 | 4.34653006027645   | 3.82282484417227   | c  |
| -0.34183527963763 | 4.34653006027645   | -3.82282484417227  | c  |
| -6.04831604310449 | 0.21044766903784   | 0.00000000000000   | c  |
| 4.27099223856627  | -6.29259064438526  | -7.96346930085311  | c  |
| 3.79250885402102  | -7.09728181877918  | -10.43726953544422 | c  |
| 6.74594903978430  | -5.66508294916667  | -7.24906883395834  | c  |
| 5.77739676545468  | -7.31471825284580  | -12.15963187016356 | c  |
| 8.71863531864599  | -5.89551957419688  | -8.97432748829839  | c  |
| 8.23854891984927  | -6.72561908244409  | -11.43211315619212 | c  |
| -1.02875007066327 | -7.48487904025720  | -6.85805308673061  | c  |
| -0.87755230956466 | -10.06362008428970 | -7.46774486908330  | c  |
| -3.34152439299558 | -6.22069704611659  | -7.08588837547144  | c  |
| -3.01423504438448 | -11.34797263985460 | -8.30510704680705  | c  |
| -5.47881871364064 | -7.51956784741051  | -7.92193337371152  | c  |
| -5.31666488046697 | -10.07521224023725 | -8.53232389818253  | c  |
| -1.02875007066327 | -7.48487904025720  | 6.85805308673061   | c  |
| -0.87755230956466 | -10.06362008428970 | 7.46774486908330   | c  |
| -3.34152439299558 | -6.22069704611659  | 7.08588837547144   | c  |
| -3.01423504438448 | -11.34797263985460 | 8.30510704680705   | c  |
| -5.47881871364064 | -7.51956784741051  | 7.92193337371152   | c  |
| -5.31666488046697 | -10.07521224023725 | 8.53232389818253   | c  |

|                   |                    |                    |   |
|-------------------|--------------------|--------------------|---|
| 4.27099223856627  | -6.29259064438526  | 7.96346930085311   | c |
| 6.74594903978430  | -5.66508294916667  | 7.24906883395834   | c |
| 3.79250885402102  | -7.09728181877918  | 10.43726953544422  | c |
| 8.71863531864599  | -5.89551957419688  | 8.97432748829839   | c |
| 5.77739676545468  | -7.31471825284580  | 12.15963187016356  | c |
| 8.23854891984927  | -6.72561908244409  | 11.43211315619212  | c |
| 5.36233064260914  | -3.89118991561915  | 0.00000000000000   | c |
| 5.39430626557967  | -1.24616537612147  | 0.00000000000000   | c |
| 7.66527139035779  | -5.21297293237669  | 0.00000000000000   | c |
| 7.69074405907715  | 0.05264180361715   | 0.00000000000000   | c |
| 9.95259258903464  | -3.91083154030965  | 0.00000000000000   | c |
| 9.96577799711955  | -1.27065824652912  | 0.00000000000000   | c |
| -0.68868482322424 | 7.03001998711009   | -4.52546703938225  | c |
| 1.81229984500933  | 8.48065130738333   | -4.15012669737247  | c |
| -1.47183764737475 | 7.14145383643104   | -7.33587765216104  | c |
| 1.66493750997267  | 11.19347194690235  | -5.13220255207033  | c |
| -1.63834195542887 | 9.85839290103022   | -8.29566539871385  | c |
| 0.83895370987126  | 11.28283947748902  | -7.89554540328701  | c |
| -0.68868482322424 | 7.03001998711009   | 4.52546703938225   | c |
| -1.47183764737475 | 7.14145383643104   | 7.33587765216104   | c |
| 1.81229984500933  | 8.48065130738333   | 4.15012669737247   | c |
| -1.63834195542887 | 9.85839290103022   | 8.29566539871385   | c |
| 1.66493750997267  | 11.19347194690235  | 5.13220255207033   | c |
| 0.83895370987126  | 11.28283947748902  | 7.89554540328701   | c |
| -2.62152727026001 | 8.09391235626609   | -2.99337350382472  | o |
| -2.62152727026001 | 8.09391235626609   | 2.99337350382472   | o |
| -7.15921428618902 | 2.75588871724947   | 0.00000000000000   | c |
| -8.73813541100496 | 3.26571195498807   | -2.38608237866894  | c |
| -8.73813541100496 | 3.26571195498807   | 2.38608237866894   | c |
| -9.85247185646510 | 5.92835834515504   | -2.38658242840219  | c |
| -9.85247185646510 | 5.92835834515504   | 2.38658242840219   | c |
| -11.3933313222356 | 6.43983937381171   | 0.00000000000000   | c |
| -4.94236669834245 | 4.30095670025255   | 0.00000000000000   | o |
| -5.20779130640554 | 6.11632818150807   | 0.00000000000000   | h |
| 1.86827571342739  | -7.55423419294144  | -11.03526819694966 | h |
| 7.14414389749867  | -4.96527769045119  | -5.34062800923473  | h |
| 5.38784095415146  | -7.94938771236672  | -14.08795103977045 | h |
| 10.64326261370290 | -5.40678825978303  | -8.39980936912557  | h |
| 9.78940647286736  | -6.89998335056908  | -12.78768352109320 | h |
| 0.92053384840418  | -11.07665094511787 | -7.30772596355081  | h |
| -3.48177297630382 | -4.21809968983133  | -6.58564038853335  | h |
| -2.88492508450714 | -13.35439075408147 | -8.78561669189909  | h |
| -7.28026820083858 | -6.52049896544444  | -8.08472034982740  | h |
| -6.99447576168321 | -11.09039385541000 | -9.18704339150262  | h |
| 0.92053384840418  | -11.07665094511787 | 7.30772596355081   | h |
| -3.48177297630382 | -4.21809968983133  | 6.58564038853335   | h |
| -2.88492508450714 | -13.35439075408147 | 8.78561669189909   | h |
| -7.28026820083858 | -6.52049896544444  | 8.08472034982740   | h |
| -6.99447576168321 | -11.09039385541000 | 9.18704339150262   | h |
| 7.14414389749867  | -4.96527769045119  | 5.34062800923473   | h |
| 1.86827571342739  | -7.55423419294144  | 11.03526819694966  | h |
| 10.64326261370290 | -5.40678825978303  | 8.39980936912557   | h |
| 5.38784095415146  | -7.94938771236672  | 14.08795103977045  | h |
| 9.78940647286736  | -6.89998335056908  | 12.78768352109320  | h |
| 3.62701719440563  | -0.17551629675080  | 0.00000000000000   | h |
| 7.70064442710537  | -7.28363364930557  | 0.00000000000000   | h |
| 7.68184516616005  | 2.11883422283935   | 0.00000000000000   | h |
| 11.73290442425847 | -4.96181207111169  | 0.00000000000000   | h |
| 11.76213631760595 | -0.24716000286509  | 0.00000000000000   | h |
| 3.31620354946289  | 7.45683738452143   | -5.17176347044556  | h |
| 2.30620125414991  | 8.44031928063298   | -2.12440085716670  | h |
| -0.06773568527452 | 6.08099655801149   | -8.45914160789067  | h |
| -3.29833950512896 | 6.15946418808095   | -7.53939520913495  | h |
| 3.51959899431427  | 12.11682429363107  | -4.88770451434308  | h |
| 0.33803689615156  | 12.32011496396606  | -3.96216216762798  | h |
| -2.15855516256994 | 9.84931805685770   | -10.31563371849812 | h |
| -3.19752342705702 | 10.85659078415482  | -7.31852743274164  | h |
| 0.65944867420098  | 13.25978195376145  | -8.53729462917092  | h |
| 2.32784531859817  | 10.40905205742796  | -9.07665259905970  | h |
| -0.06773568527452 | 6.08099655801149   | 8.45914160789067   | h |
| -3.29833950512896 | 6.15946418808095   | 7.53939520913495   | h |
| 3.31620354946289  | 7.45683738452143   | 5.17176347044556   | h |
| 2.30620125414991  | 8.44031928063298   | 2.12440085716670   | h |
| -2.15855516256994 | 9.84931805685770   | 10.31563371849812  | h |
| -3.19752342705702 | 10.85659078415482  | 7.31852743274164   | h |
| 3.51959899431427  | 12.11682429363107  | 4.88770451434308   | h |
| 0.33803689615156  | 12.32011496396606  | 3.96216216762798   | h |

|                    |                   |                   |   |
|--------------------|-------------------|-------------------|---|
| 0.65944867420098   | 13.25978195376145 | 8.53729462917092  | h |
| 2.32784531859817   | 10.40905205742796 | 9.07665259905970  | h |
| -2.58677210938229  | 9.90766461025171  | -3.24428178044495 | h |
| -2.58677210938229  | 9.90766461025171  | 3.24428178044495  | h |
| 4.62948775293063   | -8.42740182329833 | -3.10545324235539 | h |
| 1.38557398660935   | -9.29137751469157 | -2.67188310018775 | h |
| 4.62948775293063   | -8.42740182329833 | 3.10545324235539  | h |
| 1.38557398660935   | -9.29137751469157 | 2.67188310018775  | h |
| -10.27481394584438 | 1.85316878232801  | -2.46292218060620 | h |
| -7.52711021985781  | 2.95883900435535  | -4.05453122589816 | h |
| -10.27481394584438 | 1.85316878232801  | 2.46292218060620  | h |
| -7.52711021985781  | 2.95883900435535  | 4.05453122589816  | h |
| -11.03529055067768 | 6.18758945102426  | -4.08601700147827 | h |
| -8.30428204074401  | 7.32653398212951  | -2.55633387117595 | h |
| -11.03529055067768 | 6.18758945102426  | 4.08601700147827  | h |
| -8.30428204074401  | 7.32653398212951  | 2.55633387117595  | h |
| -12.10581225960974 | 8.40150932022245  | 0.00000000000000  | h |
| -13.07948534498535 | 5.20103992377348  | 0.00000000000000  | h |

**[Au<sub>3</sub>Cu(C<sub>2</sub>C<sub>6</sub>H<sub>11</sub>O)<sub>3</sub>(Ph<sub>2</sub>PCH<sub>2</sub>PPhCH<sub>2</sub>PPh<sub>2</sub>)]<sup>2+</sup> (2b)**

|                   |                   |                   |   |
|-------------------|-------------------|-------------------|---|
| 61.71085485730234 | 23.85551170666237 | 15.78166885521822 | c |
| 60.14354221472593 | 25.24873262657646 | 16.81014128208032 | c |
| 63.42815464063534 | 21.67987082951246 | 21.83637934660728 | c |
| 62.20990105059661 | 22.88294435202526 | 23.41576056714911 | c |
| 67.59064183788571 | 26.42014842150072 | 19.59166483889587 | c |
| 66.20230429382116 | 28.26993823030974 | 19.20244639461204 | c |
| 58.05768898931831 | 26.78380932767472 | 17.87809087053050 | c |
| 57.23518574487726 | 28.83563443351749 | 15.98551621217113 | c |
| 56.77924098164561 | 27.90512575649021 | 14.17169568011631 | h |
| 58.85120887290207 | 30.10279007537838 | 15.61532565026547 | h |
| 67.56671303037183 | 15.70711639528238 | 14.72785042486980 | c |
| 65.80328413821728 | 14.61452617393229 | 14.97251350969378 | h |
| 68.99469568382308 | 14.45557779787089 | 13.86088693977315 | h |
| 54.96415186817039 | 30.32932504730521 | 16.94899304386727 | c |
| 55.52068074204192 | 31.39463762147059 | 18.65503393156803 | h |
| 54.40888364002399 | 31.74329126372970 | 15.51694954775779 | h |
| 71.74109079433804 | 17.67945342205525 | 17.85472486230685 | c |
| 73.06823397861389 | 16.07091750501807 | 17.88956023087659 | h |
| 72.00350790824369 | 18.70135458439877 | 16.05519697916882 | h |
| 52.74802705933069 | 28.59624738793698 | 17.57954190963970 | c |
| 52.05604934989351 | 27.69771722595351 | 15.81834698411758 | h |
| 51.15647037684839 | 29.70800726517797 | 18.34369724641118 | h |
| 53.52752116207080 | 26.54591067920166 | 19.45067296874442 | c |
| 51.94598952267555 | 25.23015541132112 | 19.80017977756775 | h |
| 53.99238560918830 | 27.40866437799297 | 21.29190942584607 | h |
| 55.80564836579170 | 25.05107721112830 | 18.50393589035449 | c |
| 56.41587102300986 | 23.66288094487512 | 19.93388253937476 | h |
| 55.30262787365236 | 24.00535833150241 | 16.76628414755127 | h |
| 60.73677718925620 | 24.27139638397734 | 25.34516997220351 | c |
| 60.27763182470125 | 22.52856301738277 | 27.62439562524136 | c |
| 59.26776755929387 | 20.82702781383662 | 26.96796961767129 | h |
| 58.96598145968431 | 23.56666024072533 | 28.87490070343628 | h |
| 62.69632754967289 | 21.85165089991002 | 29.03509113179296 | c |
| 63.91151857156790 | 20.67646461263944 | 27.80015811504343 | h |
| 62.22558130049146 | 20.67883773096710 | 30.69567371765113 | h |
| 64.14347929384407 | 24.21061061171480 | 29.85453613732713 | c |
| 63.01973854759573 | 25.23963998353150 | 31.28705755127612 | h |
| 65.93423935553834 | 23.67976959009367 | 30.78791708094448 | h |
| 64.66112109220724 | 25.96280155156962 | 27.62063011617406 | c |
| 65.98999807203333 | 25.04391220564850 | 26.29019576412337 | h |
| 65.59260079112551 | 27.71282989318044 | 28.27299471041873 | h |
| 62.22639132830673 | 26.61887121035404 | 26.22451820329934 | c |
| 62.62561553291680 | 27.82343520255509 | 24.56415112459408 | h |
| 60.93509524489451 | 27.68949765294622 | 27.46905898822500 | h |
| 65.15053217527584 | 30.82828601835210 | 18.76825578631008 | c |
| 67.03051794830141 | 32.83066835835703 | 19.72348371937450 | c |
| 67.46684426745253 | 32.45910339782980 | 21.73277599755044 | h |
| 66.03249447592242 | 34.66434199701914 | 19.62470738734581 | h |
| 69.44675290181372 | 32.93866733609556 | 18.15863643863305 | c |
| 70.66782931042128 | 34.46656886086721 | 18.88198911675161 | h |
| 70.51228649778398 | 31.15757707289211 | 18.40563650808955 | h |
| 68.85279874904650 | 33.35342235567389 | 15.36701735269852 | c |
| 68.02166152218810 | 35.25616833613999 | 15.11503498820374 | h |

|                   |                   |                   |    |
|-------------------|-------------------|-------------------|----|
| 70.61025162546811 | 33.32683275662924 | 14.24228515837968 | h  |
| 67.00394613281688 | 31.37192874325421 | 14.37816968514518 | c  |
| 67.91507243883301 | 29.48930231834795 | 14.38939288687081 | h  |
| 66.49824591546043 | 31.77196463220440 | 12.39479910042462 | h  |
| 64.59557818060480 | 31.26268521828344 | 15.95928999837917 | c  |
| 63.32474766398218 | 29.76144800836246 | 15.26676581511590 | h  |
| 63.56400382428955 | 33.07475388093809 | 15.83396144402259 | h  |
| 69.83667994466664 | 19.70944804335100 | 11.67190433202993 | c  |
| 70.39502448182576 | 22.20074258760430 | 12.37355826550036 | c  |
| 69.00635867875991 | 23.31498936481043 | 13.43026493139798 | h  |
| 72.71446920695151 | 23.27117835007470 | 11.71211823911837 | c  |
| 73.13109818524123 | 25.22137735190122 | 12.25547134645422 | h  |
| 74.47588549123621 | 21.86701511434781 | 10.34410810242991 | c  |
| 76.28252621983846 | 22.71570362973036 | 9.80476034609657  | h  |
| 73.92521550245165 | 19.38348569894506 | 9.63529139278231  | c  |
| 75.29661242040945 | 18.28748984374948 | 8.54413089934258  | h  |
| 71.61457039230504 | 18.30780807027369 | 10.29043337499777 | c  |
| 71.18027883703337 | 16.37776439648935 | 9.68252087619122  | h  |
| 65.76860697014315 | 16.67078840302251 | 9.69032540624767  | c  |
| 65.67759482196583 | 18.06746172968918 | 7.43887439499977  | c  |
| 66.24539626696870 | 20.05488772351313 | 7.40930612673337  | h  |
| 64.85385616324436 | 16.94305084075581 | 5.20537152443695  | c  |
| 64.78898013439847 | 18.06507618643610 | 3.47101907966383  | h  |
| 64.10791522295841 | 14.41258069649373 | 5.19850825946726  | c  |
| 63.47726595293144 | 13.52314408827846 | 3.44218933447285  | h  |
| 64.18576917530605 | 13.01416479258370 | 7.43092014219438  | c  |
| 63.62914760028382 | 11.02257782080176 | 7.43012046429385  | h  |
| 65.00984159156411 | 14.13480713149178 | 9.67341163125566  | c  |
| 65.06086429987238 | 12.99100370064093 | 11.39119133028629 | h  |
| 68.60003890857158 | 13.47590279870714 | 19.54697676852015 | c  |
| 67.11428787392568 | 13.02535825589670 | 21.68964406176251 | c  |
| 65.90334765547728 | 14.52914157650699 | 22.43445363266733 | h  |
| 67.20006748129087 | 10.67937827266083 | 22.88926526411266 | c  |
| 66.04395075840698 | 10.34551242187914 | 24.56958482555198 | h  |
| 68.76276671860440 | 8.77463490679141  | 21.95745729121376 | c  |
| 68.82806077544579 | 6.93539253187920  | 22.89944287670507 | h  |
| 70.25149601432800 | 9.21318354214833  | 19.82230836153873 | c  |
| 71.48127907641609 | 7.72166832183876  | 19.09012117489736 | h  |
| 70.17382113632937 | 11.55290332224589 | 18.62078764802763 | c  |
| 71.35820621274938 | 11.86186980429599 | 16.95069254476872 | h  |
| 72.05874220103735 | 18.15645972540288 | 23.33358828587372 | c  |
| 70.42416238731494 | 19.07328269093894 | 25.20399677618485 | c  |
| 69.41208349965778 | 20.85455156436182 | 24.91494110411702 | h  |
| 70.07670028688591 | 17.71681086379762 | 27.43796934751354 | c  |
| 68.80105396614138 | 18.45027070647217 | 28.88976925573036 | h  |
| 71.35700720843117 | 15.44623633849323 | 27.81466612566820 | c  |
| 71.09279086509359 | 14.39023134498847 | 29.57231712179269 | h  |
| 72.98848340933522 | 14.52110992579791 | 25.95599714597418 | c  |
| 73.99952634217132 | 12.74312545061298 | 26.25367727251203 | h  |
| 73.34008539454869 | 15.86614828816605 | 23.72329895915697 | c  |
| 74.64256675919796 | 15.13083464702256 | 22.29358488486646 | h  |
| 75.85486769644761 | 20.52595762131381 | 20.07576046665188 | c  |
| 77.52196429381503 | 20.29020368272101 | 22.11695102226176 | c  |
| 76.83711593267144 | 19.65975738171398 | 23.96141137099460 | h  |
| 80.07451727836226 | 20.87283106724486 | 21.80863110182741 | c  |
| 81.36351798663489 | 20.68553719208094 | 23.41332880056731 | h  |
| 80.97776818902976 | 21.69107874121532 | 19.47416001257593 | c  |
| 82.98080249088432 | 22.14429533178115 | 19.23970014480886 | h  |
| 79.31796003759456 | 21.94552930366864 | 17.43967165407969 | c  |
| 80.01616468837055 | 22.60294700602548 | 15.60850257037570 | h  |
| 76.76553131148344 | 21.38128390650051 | 17.73704569475574 | c  |
| 75.48336771082867 | 21.62862995022182 | 16.13076363888640 | h  |
| 58.82770939160144 | 27.91303485160785 | 20.18172430901173 | o  |
| 60.22950855107982 | 29.11729554448049 | 19.89963766681302 | h  |
| 62.80881898897085 | 31.12821845744195 | 20.08354947085630 | o  |
| 63.16929653698114 | 31.33486154650614 | 21.87346806199367 | h  |
| 58.35519810943111 | 24.95037494827868 | 24.40087046646899 | o  |
| 58.57881364550892 | 26.11766886017583 | 22.96831916937623 | h  |
| 66.79916062712294 | 18.32646965559275 | 12.54446032249190 | p  |
| 68.43574272351954 | 16.54715094452391 | 18.00037531827537 | p  |
| 72.47722762515124 | 19.94655284149264 | 20.43163592189358 | p  |
| 63.97002522617220 | 24.68743814388780 | 19.09644374520544 | cu |
| 64.01875340757530 | 21.28019234020243 | 14.21021033641919 | au |
| 65.68952490536529 | 19.37202021791149 | 19.85868165615487 | au |
| 69.88355341750164 | 23.44759790879503 | 20.05275774330981 | au |
| 62.50759850730551 | 23.86229414822699 | 7.68297853125155  | c  |
| 64.07364450483135 | 25.25943821686158 | 6.65792398251618  | c  |

|                   |                   |                   |   |
|-------------------|-------------------|-------------------|---|
| 60.79448626133217 | 21.69315841804583 | 1.62530376910397  | c |
| 62.01295365556003 | 22.89903531287532 | 0.04825596168624  | c |
| 56.62451014390287 | 26.42437631334447 | 3.87669170068536  | c |
| 58.01038999152317 | 28.27523523421160 | 4.26948699020167  | c |
| 66.15822080338960 | 26.79877150802252 | 5.59359873558547  | c |
| 66.97680645048281 | 28.84880600567296 | 7.48979187118719  | c |
| 67.43223792959850 | 27.91621685135745 | 9.30266290344997  | h |
| 65.35902921602950 | 30.11359131384491 | 7.86039721953592  | h |
| 56.66385668396924 | 15.70390830699286 | 8.72399697874539  | c |
| 58.42905034906283 | 14.61464532255506 | 8.47733787104063  | h |
| 55.23808330283861 | 14.44845711115802 | 9.58892921102097  | h |
| 69.24687084297348 | 30.34656289744441 | 6.53033611731079  | c |
| 68.69049242128966 | 31.41365388422090 | 4.82536165993903  | h |
| 69.79929614235621 | 31.75912530813868 | 7.96486961619108  | h |
| 52.48646178302369 | 17.67489665836504 | 5.60001387743160  | c |
| 51.16161404175067 | 16.06453871304266 | 5.56248524155152  | h |
| 52.22235694156451 | 18.69362871744648 | 7.40109097260612  | h |
| 71.46558712583676 | 28.61700546255028 | 5.89921452403318  | c |
| 72.15698902622984 | 27.71678294511367 | 7.65975808402124  | h |
| 73.05655646688631 | 29.73167290003297 | 5.13805370088841  | h |
| 70.69013350441371 | 26.56835890915764 | 4.02454285575137  | c |
| 72.27345881119093 | 25.25483958391224 | 3.67473105774428  | h |
| 70.22601813207159 | 27.43312894640707 | 2.18405783050731  | h |
| 68.41282075900045 | 25.06963087283755 | 4.967067422291205 | c |
| 67.80549424206365 | 23.68286741947239 | 3.53449797959451  | h |
| 68.91544832022757 | 24.02189831634843 | 6.70360957474828  | h |
| 63.48716483058385 | 24.29073086971168 | -1.87794332838834 | c |
| 63.95076915369441 | 22.55025512822153 | -4.15807943599800 | c |
| 64.96081834159745 | 20.84882266316831 | -3.50165882254437 | h |
| 65.26355016070575 | 23.59031793646141 | -5.40576690370997 | h |
| 61.53461044790125 | 21.87301339554236 | -5.57295465906841 | c |
| 60.31824351778536 | 20.69595258184538 | -4.34096159391879 | h |
| 62.00863589763703 | 20.70197510856323 | -7.23385997382118 | h |
| 60.08726800929971 | 24.23181953374668 | -6.39240989345035 | c |
| 61.21278400687832 | 25.26311626338537 | -7.82189871703235 | h |
| 58.29847164003488 | 23.70080024175909 | -7.32943534501920 | h |
| 59.56465125773198 | 25.98119014559310 | -4.15747037734263 | c |
| 58.23437309263298 | 25.05974939651007 | -2.83019643356185 | h |
| 58.63281565876181 | 27.73119574216502 | -4.80937268855049 | h |
| 61.99665964023095 | 26.63778663651457 | -2.75687740599061 | c |
| 61.59388286489724 | 27.84012641764252 | -1.09574473625967 | h |
| 63.28882775294610 | 27.71100826989441 | -3.99827796117862 | h |
| 59.05961681988570 | 30.83390525807502 | 4.70773104595703  | c |
| 57.17760138048117 | 32.83598409910276 | 3.75587828187909  | c |
| 56.74182716080336 | 32.46761652634013 | 1.74588125963822  | h |
| 58.17375393440839 | 34.67048492572054 | 3.85802333050694  | h |
| 54.76110760434420 | 32.93865976904338 | 5.32069260944992  | c |
| 53.53862092881029 | 34.46675165825295 | 4.60013210194704  | h |
| 53.69734207589825 | 31.15701556453776 | 5.07012330082122  | h |
| 55.35419853607721 | 33.34859567078804 | 8.11321900862158  | c |
| 56.18295664469078 | 35.25185998898852 | 8.36912014865218  | h |
| 53.59659128205166 | 33.31761819577991 | 9.23759357720288  | h |
| 57.20538003928110 | 31.36750038443430 | 9.09849757486362  | c |
| 56.29663328103731 | 29.48375215720253 | 9.08360221510175  | h |
| 57.71031744287693 | 31.76441908144155 | 11.08269107757616 | h |
| 59.61402346405193 | 31.26422986905700 | 7.51741069112543  | c |
| 60.88675530451194 | 29.76343824512496 | 8.20738751518255  | h |
| 60.64321873280749 | 33.07742523984049 | 7.64594900069212  | h |
| 54.38742406968015 | 19.69653433131769 | 11.78767654411563 | c |
| 53.82447129784199 | 22.18845858964775 | 11.09194982538158 | c |
| 55.21096340645271 | 23.30771540234645 | 10.03768207394871 | h |
| 51.50318920709535 | 23.25314297356004 | 11.75630716412751 | c |
| 51.08294865934359 | 25.20387554682458 | 11.21766708009122 | h |
| 49.74434024602824 | 21.84243964317369 | 13.12089430114013 | c |
| 47.93618884611157 | 22.68652881805047 | 13.66239144070299 | h |
| 50.29968379169038 | 19.35831273757055 | 13.82395704877191 | c |
| 48.93032263870165 | 18.25717623750185 | 14.91250296126675 | h |
| 52.61225217395433 | 18.28845202264627 | 13.16612014541017 | c |
| 53.05015218992590 | 16.35779322591319 | 13.76946759840380 | h |
| 58.46175708249149 | 16.66181282605275 | 13.76258701608242 | c |
| 58.54993264768510 | 18.05397434914440 | 16.01697963612915 | c |
| 57.97752968123293 | 20.04002170212045 | 16.05089123102362 | h |
| 59.37698548464266 | 16.92683450531909 | 18.24789287273249 | c |
| 59.43946391880845 | 18.04528278062476 | 19.98463982593358 | h |
| 60.12942788377664 | 14.39826687538899 | 18.24916395642114 | c |
| 60.76293027569587 | 13.50672579318246 | 20.00338944500490 | h |
| 60.05416005703407 | 13.00431454587153 | 16.01387982683576 | c |



|                    |                   |                   |    |
|--------------------|-------------------|-------------------|----|
| 60.61564619827470  | 11.01409316047416 | 16.01032208954265 | h  |
| 59.22667585725712  | 14.12765847746393 | 13.77400871006325 | c  |
| 59.17797705047925  | 12.98735964989634 | 12.05384612952772 | h  |
| 55.63386918405945  | 13.47868640784120 | 3.90139942636812  | c  |
| 57.12144523551268  | 13.03336668277267 | 1.75890704167183  | c  |
| 58.33087964242478  | 14.53985781313708 | 1.01713574382271  | h  |
| 57.03918837807817  | 10.68920971892966 | 0.55548434293907  | c  |
| 58.19677281652660  | 10.35937627723639 | -1.12462125164429 | h  |
| 55.47852119585441  | 8.78097378429846  | 1.48354486141133  | c  |
| 55.41597697971381  | 6.94317422812768  | 0.53856150074751  | h  |
| 53.98782780354369  | 9.21438602116621  | 3.61837151110880  | c  |
| 52.75962302145631  | 7.72012789105098  | 4.34760814992885  | h  |
| 54.06198841938440  | 11.55226341027184 | 4.82368606675215  | c  |
| 52.87626175167063  | 11.85713376056787 | 6.49358495966868  | h  |
| 52.169216427101409 | 18.15973094524016 | 0.12191680471576  | c  |
| 53.80291279218995  | 19.08177962024562 | -1.74669534254129 | c  |
| 54.81212650832222  | 20.86420376604550 | -1.45477921479256 | h  |
| 54.15342298481288  | 17.72891674898154 | -3.98237002612131 | c  |
| 55.42844233515975  | 18.46643586630776 | -5.43266922440061 | h  |
| 52.87686766340073  | 15.45682864291232 | -4.36265334682099 | c  |
| 53.14355577614032  | 14.40354984870141 | -6.12156558346460 | h  |
| 51.24615961373992  | 14.52657102996112 | -2.50586951598656 | c  |
| 50.23799959730675  | 12.74742952512664 | -2.80640465591422 | h  |
| 50.89150127600443  | 15.86802845021327 | -0.27149620536653 | c  |
| 49.58972613610611  | 15.12864013125266 | 1.15675601238286  | h  |
| 48.36898351732053  | 20.51872632498555 | 3.38294422254764  | c  |
| 46.70212059745560  | 20.28286534909204 | 1.34158722711252  | c  |
| 47.38784988323938  | 19.65589505124871 | -0.50373355327476 | h  |
| 44.14861940422244  | 20.86081103538216 | 1.65090032355962  | c  |
| 42.85978975711558  | 20.67351188800086 | 0.04606592528559  | h  |
| 43.24423431057517  | 21.67458068680931 | 3.98649566078539  | c  |
| 41.24045295515732  | 22.12406797815327 | 4.22174411728060  | h  |
| 44.90379549996114  | 21.92917574984333 | 6.02117201047703  | c  |
| 44.20467670943792  | 22.58315930206494 | 7.85322064561662  | h  |
| 47.45713549801451  | 21.36961404913192 | 5.72282585266101  | c  |
| 48.73905741242697  | 21.61702018475584 | 7.32930087210140  | h  |
| 65.38845241240652  | 27.93036086279359 | 3.29109530020856  | o  |
| 63.98426996769710  | 29.13162522065940 | 3.57405268035462  | h  |
| 61.40094881796987  | 31.13829767029549 | 3.39279442537668  | o  |
| 61.04016811029072  | 31.34512095488731 | 1.60295065402618  | h  |
| 65.86693983963590  | 24.97095168241791 | -0.92995809792343 | o  |
| 65.64059272053298  | 26.13675891127439 | 0.50339636491824  | h  |
| 57.42726954816687  | 18.32083288033212 | 10.91177341418057 | p  |
| 55.79344903585221  | 16.54772383351830 | 5.45284601176953  | p  |
| 51.74749501932125  | 19.94489842634177 | 3.02643409950358  | p  |
| 60.24666771422790  | 24.69508047759712 | 4.37021301565566  | cu |
| 60.20288768523949  | 21.28157111920376 | 9.25046304607041  | au |
| 58.53538053409473  | 19.37957854195882 | 3.59890460945847  | au |
| 54.33605417460868  | 23.44911193514575 | 3.41083815780856  | au |

**[Au<sub>3</sub>Cu(C<sub>2</sub>C<sub>6</sub>H<sub>11</sub>O)<sub>3</sub>(Ph<sub>2</sub>P(CH<sub>2</sub>)<sub>2</sub>PPh(CH<sub>2</sub>)<sub>2</sub>PPh<sub>2</sub>)]<sub>2</sub><sup>2+</sup> (3)**

|                   |                    |                   |    |
|-------------------|--------------------|-------------------|----|
| 4.32331079320317  | 8.98166797854273   | 1.43163168795719  | au |
| -4.96920066634335 | 8.332405187998714  | 2.35565914301103  | au |
| -2.39910720734744 | 3.45757072780666   | -0.26904985825766 | au |
| 2.39910720734744  | -3.45757072780666  | -0.26904985825766 | au |
| 4.96920066634335  | -8.332405187998714 | 2.35565914301103  | au |
| -4.32331079320317 | -8.98166797854273  | 1.43163168795719  | au |
| 1.27984768748427  | -9.08017044910219  | -1.86632280566399 | cu |
| -1.27984768748427 | 9.08017044910219   | -1.86632280566399 | cu |
| -7.68658253153848 | -6.63539562700529  | 2.92527701045490  | p  |
| -5.07330843157163 | 1.52464475904673   | 2.59236878782270  | p  |
| -4.36601530480346 | 7.21277011081610   | 6.53516918109684  | p  |
| 4.36601530480346  | -7.21277011081610  | 6.53516918109684  | p  |
| 5.07330843157163  | -1.52464475904673  | 2.59236878782270  | p  |
| 7.68658253153848  | 6.63539562700529   | 2.92527701045490  | p  |
| 1.66531136878516  | 11.18376164882255  | -0.11957326518278 | c  |
| 0.40417368976701  | 12.80851144399717  | -1.25313511160803 | c  |
| 0.27292786398903  | -5.16827906052879  | -2.88678746598364 | c  |
| -0.82971570652555 | -6.35084734183494  | -4.57384302959201 | c  |
| 5.35127133836779  | -9.22055878415888  | -1.30802295279487 | c  |
| 5.61097322473017  | -9.52099052586750  | -3.6055745888231  | c  |
| -5.35127133836779 | 9.22055878415888   | -1.30802295279487 | c  |
| -5.61097322473017 | 9.52099052586750   | -3.6055745888231  | c  |

|                    |                    |                    |   |
|--------------------|--------------------|--------------------|---|
| -0.27292786398903  | 5.16827906052879   | -2.88678746598364  | c |
| 0.82971570652555   | 6.35084734183494   | -4.57384302959201  | c |
| -1.66531136878516  | -11.18376164882255 | -0.11957326518278  | c |
| -0.40417368976701  | -12.80851144399717 | -1.25313511160803  | c |
| 6.86797828545960   | 3.40177197677980   | 3.97161561417361   | c |
| 5.35131417466570   | 1.91732776637797   | 2.02449670321348   | c |
| 4.08062425920775   | -1.73895091569939  | 5.94340797104239   | c |
| 2.70668053632719   | -4.13541933490729  | 6.79828707321498   | c |
| -2.70668053632719  | 4.13541933490729   | 6.79828707321498   | c |
| -4.08062425920775  | 1.73895091569939   | 5.94340797104239   | c |
| -5.35131417466570  | -1.91732776637797  | 2.02449670321348   | c |
| -6.86797828545960  | -3.40177197677980  | 3.97161561417361   | c |
| 0.50038067953416   | -15.03954706981556 | -2.68343770064280  | c |
| 2.97773153099817   | -16.10484560101881 | -1.62100711290964  | c |
| -1.57815711113255  | -17.08499187769450 | -2.61717896707838  | c |
| 3.79373050794448   | -18.50098096040767 | -3.00585271187643  | c |
| -0.75414341091273  | -19.47350197807873 | -4.00699951096768  | c |
| 1.72436477856611   | -20.50913791231282 | -2.95813270562489  | c |
| -0.50038067953416  | 15.03954706981556  | -2.68343770064280  | c |
| -2.97773153099817  | 16.10484560101881  | -1.62100711290964  | c |
| 1.57815711113255   | 17.08499187769450  | -2.61717896707838  | c |
| -3.79373050794448  | 18.50098096040767  | -3.00585271187643  | c |
| 0.75414341091273   | 19.47350197807873  | -4.00699951096768  | c |
| -1.72436477856611  | 20.50913791231282  | -2.95813270562489  | c |
| 6.11691267537224   | -9.91123004185868  | -6.32580972754256  | c |
| 6.67910455221897   | -7.37174388374007  | -7.61970084107106  | c |
| 8.37663753913194   | -11.72319023379667 | -6.65030945723300  | c |
| 7.37800149927001   | -7.71818565521201  | -10.39635187965645 | c |
| 9.07238789027114   | -12.06061971533550 | -9.42835206626350  | c |
| 9.60136529176684   | -9.52958426220745  | -10.70553797158278 | c |
| -6.11691267537224  | 9.91123004185868   | -6.32580972754256  | c |
| -6.67910455221897  | 7.37174388374007   | -7.61970084107106  | c |
| -8.37663753913194  | 11.72319023379667  | -6.65030945723300  | c |
| -7.37800149927001  | 7.71818565521201   | -10.39635187965645 | c |
| -9.07238789027114  | 12.06061971533550  | -9.42835206626350  | c |
| -9.60136529176684  | 9.52958426220745   | -10.70553797158278 | c |
| 2.13153339111804   | 7.54258211675913   | -6.74968199517998  | c |
| 4.92857052321640   | 8.02077679644897   | -6.14040967030159  | c |
| 1.89648610298344   | 5.79417972884314   | -9.07175054692634  | c |
| 6.35895663476393   | 9.06157084706031   | -8.41817539119189  | c |
| 3.32943061453699   | 6.84646413098829   | -11.34217157345292 | c |
| 6.10137771096259   | 7.33156844260360   | -10.71133088415582 | c |
| -2.13153339111804  | -7.54258211675913  | -6.74968199517998  | c |
| -4.92857052321640  | -8.02077679644897  | -6.14040967030159  | c |
| -1.89648610298344  | -5.79417972884314  | -9.07175054692634  | c |
| -6.35895663476393  | -9.06157084706031  | -8.41817539119189  | c |
| -3.32943061453699  | -6.84646413098829  | -11.34217157345292 | c |
| -6.10137771096259  | -7.33156844260360  | -10.71133088415582 | c |
| 0.96046297079070   | -14.31656751195733 | -5.23773092222924  | o |
| 3.95199135859970   | -10.93144951251113 | -7.53293490295461  | o |
| -1.03711655279120  | -9.93068415099048  | -7.28653852172906  | o |
| 1.03711655279120   | 9.93068415099048   | -7.28653852172906  | o |
| -3.95199135859970  | 10.93144951251113  | -7.53293490295461  | o |
| -0.96046297079070  | 14.31656751195733  | -5.23773092222924  | o |
| -10.12706787997396 | -6.26003982244140  | 0.52331502267319   | c |
| -11.58139359649890 | -4.06031422670467  | 0.26504318342993   | c |
| -10.58412490180338 | -8.31204478314832  | -1.09299133982858  | c |
| -13.45913705227488 | -3.92492738435093  | -1.58013752420303  | c |
| -12.47528460718836 | -8.17485445811688  | -2.91849422604464  | c |
| -13.91283422160921 | -5.97838952323655  | -3.16750066271603  | c |
| -9.24058758085643  | -7.95430209555195  | 5.70610774855819   | c |
| -11.85567587117552 | -7.76523670541198  | 6.06726487179460   | c |
| -7.74499802611596  | -9.13677471521368  | 7.54601623674039   | c |
| -12.95544668753625 | -8.73557904220845  | 8.25638862703975   | c |
| -8.85287065811500  | -10.08675450710791 | 9.73762274429766   | c |
| -11.45823749860425 | -9.88933046612722  | 10.09382473580509  | c |
| 10.12706787997396  | 6.26003982244140   | 0.52331502267319   | c |
| 11.58139359649890  | 4.06031422670467   | 0.26504318342993   | c |
| 10.58412490180338  | 8.31204478314832   | -1.09299133982858  | c |
| 13.45913705227488  | 3.92492738435093   | -1.58013752420303  | c |
| 12.47528460718836  | 8.17485445811688   | -2.91849422604464  | c |
| 13.91283422160921  | 5.97838952323655   | -3.16750066271603  | c |
| 9.24058758085643   | 7.95430209555195   | 5.70610774855819   | c |
| 11.85567587117552  | 7.76523670541198   | 6.06726487179460   | c |
| 7.74499802611596   | 9.13677471521368   | 7.54601623674039   | c |
| 12.95544668753625  | 8.73557904220845   | 8.25638862703975   | c |
| 8.85287065811500   | 10.08675450710791  | 9.73762274429766   | c |

|                    |                    |                    |   |
|--------------------|--------------------|--------------------|---|
| 11.45823749860425  | 9.88933046612722   | 10.09382473580509  | c |
| -2.23570417717018  | 9.35627867708493   | 8.20714039062857   | c |
| -2.17700951091863  | 9.47357783412501   | 10.85367346831986  | c |
| -0.62499462875339  | 10.91340615892501  | 6.79457942772070   | c |
| -0.51368247181913  | 11.11485502055315  | 12.06664022007705  | c |
| 1.04062330968166   | 12.55001976218611  | 8.01878508315837   | c |
| 1.09648903008798   | 12.65362872761561  | 10.65165946818400  | c |
| -7.19711525104787  | 6.95383404291849   | 8.47316078858456   | c |
| -7.36006690659080  | 5.32382557878869   | 10.55755693698094  | c |
| -9.25789844409131  | 8.50936752510200   | 7.88229274378353   | c |
| -9.55010856544108  | 5.25415960945863   | 12.02134615176537  | c |
| -11.43611029147439 | 8.45024866220876   | 9.36142727995633   | c |
| -11.58690926563058 | 6.82099519033750   | 11.42840939724397  | c |
| 2.23570417717018   | -9.35627867708493  | 8.20714039062857   | c |
| 2.17700951091863   | -9.47357783412501  | 10.85367346831986  | c |
| 0.62499462875339   | -10.91340615892501 | 6.79457942772070   | c |
| 0.51368247181913   | -11.11485502055315 | 12.06664022007705  | c |
| -1.04062330968166  | -12.55001976218611 | 8.01878508315837   | c |
| -1.09648903008798  | -12.65362872761561 | 10.65165946818400  | c |
| 7.19711525104787   | -6.95383404291849  | 8.47316078858456   | c |
| 7.36006690659080   | -5.32382557878869  | 10.55755693698094  | c |
| 9.25789844409131   | -8.50936752510200  | 7.88229274378353   | c |
| 9.55010856544108   | -5.25415960945863  | 12.02134615176537  | c |
| 11.43611029147439  | -8.45024866220876  | 9.36142727995633   | c |
| 11.58690926563058  | -6.82099519033750  | 11.42840939724397  | c |
| 8.34232749441964   | -2.61551215164969  | 2.37046055456001   | c |
| 10.06990284960809  | -2.47827584946907  | 4.37569521621780   | c |
| 9.17795406122404   | -3.47654919713093  | 0.00467367126134   | c |
| 12.58589152970992  | -3.17530433396516  | 4.01235901437001   | c |
| 11.69398663142451  | -4.16449199837209  | -0.35150050068707  | c |
| 13.40309595644448  | -4.01301700598202  | 1.65038289284092   | c |
| -8.34232749441964  | 2.61551215164969   | 2.37046055456001   | c |
| -10.06990284960809 | 2.47827584946907   | 4.37569521621780   | c |
| -9.17795406122404  | 3.47654919713093   | 0.00467367126134   | c |
| -12.58589152970992 | 3.17530433396516   | 4.01235901437001   | c |
| -11.69398663142451 | 4.16449199837209   | -0.35150050068707  | c |
| -13.40309595644448 | 4.01301700598202   | 1.65038289284092   | c |
| -15.37507719026738 | 4.56963735727834   | 1.37535419371907   | h |
| 2.67476217852421   | -16.52028845528563 | 0.40312372178569   | h |
| 4.44710878606732   | -14.62963267767666 | -1.72786739218259  | h |
| -2.01031383315465  | -17.51700940900389 | -0.61971778600845  | h |
| -3.31795439579413  | -16.29408329955732 | -3.45646567618573  | h |
| 5.54360010031280   | -19.23323037206997 | -2.13670723998691  | h |
| 4.26197116697378   | -18.02759130688715 | -4.98507412618791  | h |
| -2.26440380861878  | -20.90631924454181 | -3.86903835522983  | h |
| -0.52513487734180  | -19.03386435769186 | -6.03414939960021  | h |
| 2.32112788662820   | -22.18828242721928 | -4.04214677452205  | h |
| 1.43031478207263   | -21.15148274891954 | -0.98782058863324  | h |
| -2.67476217852421  | 16.52028845528563  | 0.40312372178569   | h |
| -4.44710878606732  | 14.62963267767666  | -1.72786739218259  | h |
| 2.01031383315465   | 17.51700940900389  | -0.61971778600845  | h |
| 3.31795439579413   | 16.29408329955732  | -3.45646567618573  | h |
| -5.54360010031280  | 19.23323037206997  | -2.13670723998691  | h |
| -4.26197116697378  | 18.02759130688715  | -4.98507412618791  | h |
| 2.26440380861878   | 20.90631924454181  | -3.86903835522983  | h |
| 0.52513487734180   | 19.03386435769186  | -6.03414939960021  | h |
| -2.32112788662820  | 22.18828242721928  | -4.04214677452205  | h |
| -1.43031478207263  | 21.15148274891954  | -0.98782058863324  | h |
| 8.25622629568525   | -6.46447629119126  | -6.59219054682214  | h |
| 5.01226891515404   | -6.13371393603867  | -7.40311379339053  | h |
| 9.99860114561215   | -10.95372075775086 | -5.58130880041041  | h |
| 7.89776945880142   | -13.55616162140456 | -5.77189423981852  | h |
| 7.82540210177155   | -5.85971299324874  | -11.23405798800964 | h |
| 5.72315903661802   | -8.46031486544313  | -11.42861256629399 | h |
| 10.73097939713848  | -13.31722863766641 | -9.57733417813631  | h |
| 7.50148618776759   | -13.02044648666331 | -10.41068177834693 | h |
| 10.02171138508424  | -9.81718752704485  | -12.72825421861076 | h |
| 11.31583513043579  | -8.67235570412948  | -9.86294921986164  | h |
| -8.25622629568525  | 6.46447629119126   | -6.59219054682214  | h |
| -5.01226891515404  | 6.13371393603867   | -7.40311379339053  | h |
| -9.99860114561215  | 10.95372075775086  | -5.58130880041041  | h |
| -7.89776945880142  | 13.55616162140456  | -5.77189423981852  | h |
| -7.82540210177155  | 5.85971299324874   | -11.23405798800964 | h |
| -5.72315903661802  | 8.46031486544313   | -11.42861256629399 | h |
| -10.73097939713848 | 13.31722863766641  | -9.57733417813631  | h |
| -7.50148618776759  | 13.02044648666331  | -10.41068177834693 | h |
| -10.02171138508424 | 9.81718752704485   | -12.72825421861076 | h |

|                    |                    |                    |   |
|--------------------|--------------------|--------------------|---|
| -11.31583513043579 | 8.67235570412948   | -9.86294921986164  | h |
| 5.77451944664026   | 6.21430120340456   | -5.52265866585272  | h |
| 5.03121715761927   | 9.33405937391042   | -4.52278862895149  | h |
| 2.63313142140976   | 3.90917023026902   | -8.55433233667070  | h |
| -0.12840081606262  | 5.54256918295036   | -9.51701237834460  | h |
| 8.36969144328523   | 9.30961075684817   | -7.91335956229924  | h |
| 5.61601276089760   | 10.95447929547964  | -8.88518660450890  | h |
| 3.16330813846157   | 5.51747136838127   | -12.94204677278525 | h |
| 2.43183226210393   | 8.63028483353397   | -11.94782292711191 | h |
| 7.08007945661996   | 8.16102879060620   | -12.35629757451190 | h |
| 7.05074685002490   | 5.50836500389058   | -10.31354069828194 | h |
| -5.77451944664026  | -6.21430120340456  | -5.52265866585272  | h |
| -5.03121715761927  | -9.33405937391042  | -4.52278862895149  | h |
| -2.63313142140976  | -3.90917023026902  | -8.55433233667070  | h |
| 0.12840081606262   | -5.54256918295036  | -9.51701237834460  | h |
| -8.36969144328523  | -9.30961075684817  | -7.91335956229924  | h |
| -5.61601276089760  | -10.95447929547964 | -8.88518660450890  | h |
| -3.16330813846157  | -5.51747136838127  | -12.94204677278525 | h |
| -2.43183226210393  | -8.63028483353397  | -11.94782292711191 | h |
| -7.08007945661996  | -8.16102879060620  | -12.35629757451190 | h |
| -7.05074685002490  | -5.50836500389058  | -10.31354069828194 | h |
| -0.39937782586553  | -13.18680440675007 | -5.81591292162851  | h |
| 3.38962921067786   | -12.47609270727066 | -6.63951093861489  | h |
| 0.78438240137155   | -9.74524645597875  | -7.66431358953918  | h |
| -0.78438240137155  | 9.74524645597875   | -7.66431358953918  | h |
| -3.38962921067786  | 12.47609270727066  | -6.63951093861489  | h |
| 0.39937782586553   | 13.18680440675007  | -5.81591292162851  | h |
| 0.96702734797918   | -4.40888057515520  | 5.67393518264630   | h |
| 2.10287275821517   | -3.90566633498223  | 8.78416704065620   | h |
| -5.78785512411970  | -3.65997478739298  | 5.73806303288930   | h |
| -8.64532178668593  | -2.44065860885527  | 4.49062029452060   | h |
| -3.41736178046607  | -2.68087598957212  | 1.81726518368811   | h |
| -6.20843521794315  | -2.05248262856880  | 0.12423596428962   | h |
| 5.71530822469076   | -1.34058777392404  | 7.17301106974985   | h |
| 2.76617795260965   | -0.13282520840508  | 6.19355792373842   | h |
| -5.71530822469076  | 1.34058777392404   | 7.17301106974985   | h |
| -2.76617795260965  | 0.13282520840508   | 6.19355792373842   | h |
| -0.96702734797918  | 4.40888057515520   | 5.67393518264630   | h |
| -2.10287275821517  | 3.90566633498223   | 8.78416704065620   | h |
| 3.41736178046607   | 2.68087598957212   | 1.81726518368811   | h |
| 6.20843521794315   | 2.05248262856880   | 0.12423596428962   | h |
| 8.64532178668593   | 2.44065860885527   | 4.49062029452060   | h |
| 5.78785512411970   | 3.65997478739298   | 5.73806303288930   | h |
| -11.27689517925082 | -2.41988513561339  | 1.48626758821169   | h |
| -9.44888803025748  | -10.03423702986833 | -0.92276618320427  | h |
| -14.57606794770482 | -2.19629192728824  | -1.77054021535013  | h |
| -12.82027374827452 | -9.79076626991190  | -4.16028130739220  | h |
| -15.39060661372321 | -5.86653585765840  | -4.60865929416168  | h |
| -13.04777759840274 | -6.88565848339569  | 4.62447178836799   | h |
| -5.70468731229627  | -9.34382970724383  | 7.25509302170333   | h |
| -15.00140074718047 | -8.60238197399053  | 8.51962548015567   | h |
| -7.67553151134061  | -11.01222037460130 | 11.16308188741443  | h |
| -12.33050791703789 | -10.65879502063243 | 11.80286941134722  | h |
| 11.27689517925082  | 2.41988513561339   | 1.48626758821169   | h |
| 9.44888803025748   | 10.03423702986833  | -0.92276618320427  | h |
| 14.57606794770482  | 2.19629192728824   | -1.77054021535013  | h |
| 12.82027374827452  | 9.79076626991190   | -4.16028130739220  | h |
| 15.39060661372321  | 5.86653585765840   | -4.60865929416168  | h |
| 13.04777759840274  | 6.88565848339569   | 4.62447178836799   | h |
| 5.70468731229627   | 9.34382970724383   | 7.25509302170333   | h |
| 15.00140074718047  | 8.60238197399053   | 8.51962548015567   | h |
| 7.67553151134061   | 11.01222037460130  | 11.16308188741443  | h |
| 12.33050791703789  | 10.65879502063243  | 11.80286941134722  | h |
| -3.46496770017901  | 8.31845658370232   | 11.98658393105780  | h |
| -0.67723922280094  | 10.87784843067577  | 4.72505299842960   | h |
| -0.49702183153148  | 11.21530345810109  | 14.13126870927075  | h |
| 2.27243547801333   | 13.77203715227662  | 6.89458395181630   | h |
| 2.37567381427091   | 13.96568377177591  | 11.61025303053246  | h |
| -5.77533967113191  | 4.09854710102305   | 11.07314244398387  | h |
| -9.15871969103147  | 9.77314942748179   | 6.24626666387342   | h |
| -9.66023084356566  | 3.98086133205462   | 13.64624899555162  | h |
| -13.02667932291134 | 9.68377717262250   | 8.89213862974374   | h |
| -13.29725191903435 | 6.77514360629922   | 12.58890722651347  | h |
| 3.46496770017901   | -8.31845658370232  | 11.98658393105780  | h |
| 0.67723922280094   | -10.87784843067577 | 4.72505299842960   | h |
| 0.49702183153148   | -11.21530345810109 | 14.13126870927075  | h |
| -2.27243547801333  | -13.77203715227662 | 6.89458395181630   | h |

|                    |                    |                   |   |
|--------------------|--------------------|-------------------|---|
| -2.37567381427091  | -13.96568377177591 | 11.61025303053246 | h |
| 5.77533967113191   | -4.09854710102305  | 11.07314244398387 | h |
| 9.15871969103147   | -9.77314942748179  | 6.24626666387342  | h |
| 9.66023084356566   | -3.98086133205462  | 13.64624899555162 | h |
| 13.02667932291134  | -9.68377717262250  | 8.89213862974374  | h |
| 13.29725191903435  | -6.77514360629922  | 12.58890722651347 | h |
| 9.48416235485030   | -1.85878763619601  | 6.25788640907384  | h |
| 7.84201909095089   | -3.64646310001149  | -1.56706745321405 | h |
| 13.90987171354010  | -3.07503178591466  | 5.59628958719499  | h |
| 12.31199120483830  | -4.84914668384665  | -2.20131042722787 | h |
| 15.37507719026738  | -4.56963735727834  | 1.37535419371907  | h |
| -9.48416235485030  | 1.85878763619601   | 6.25788640907384  | h |
| -7.84201909095089  | 3.64646310001149   | -1.56706745321405 | h |
| -13.90987171354010 | 3.07503178591466   | 5.59628958719499  | h |
| -12.31199120483830 | 4.84914668384665   | -2.20131042722787 | h |

**[Au<sub>3</sub>Cu(C<sub>2</sub>C<sub>10</sub>H<sub>17</sub>O)<sub>3</sub>(Ph<sub>2</sub>P(CH<sub>2</sub>)<sub>2</sub>PPh(CH<sub>2</sub>)<sub>2</sub>PPh<sub>2</sub>)]<sub>2</sub><sup>2+</sup> (4)**

|                    |                    |                   |    |
|--------------------|--------------------|-------------------|----|
| 4.31272651990157   | 8.34596345693934   | 3.03497965826509  | au |
| -4.21290645392600  | 9.21143295664339   | 2.95880057906916  | au |
| -1.63512721050299  | 4.07457837366749   | 0.61484308578610  | au |
| 1.63512721050299   | -4.07457837366749  | 0.61484308578610  | au |
| 4.21290645392600   | -9.21143295664339  | 2.95880057906916  | au |
| -4.31272651990157  | -8.34596345693934  | 3.03497965826509  | au |
| 0.39632899325900   | -9.26630040190665  | -1.05225043221164 | cu |
| -0.39632899325900  | 9.26630040190665   | -1.05225043221164 | cu |
| -7.12961546890883  | -5.61766777563980  | 4.93923651399849  | p  |
| -4.37525281008453  | 2.42617487965702   | 3.60570551378226  | p  |
| -3.74683945394333  | 8.36993211985233   | 7.21918709657956  | p  |
| 3.74683945394333   | -8.36993211985233  | 7.21918709657956  | p  |
| 4.37525281008453   | -2.42617487965702  | 3.60570551378226  | p  |
| 7.12961546890883   | 5.61766777563980   | 4.93923651399849  | p  |
| 2.47015903356610   | 11.01993112929984  | 1.07372868685454  | c  |
| 1.99622333562324   | 12.81080382581693  | -0.36559867458105 | c  |
| -0.66030815196759  | -5.44077426516036  | -2.08583816761100 | c  |
| -1.99157123433391  | -6.19209785885533  | -3.85080986773414 | c  |
| 4.39156367690009   | -9.91551897689168  | -0.76409085176649 | c  |
| 4.56487801571500   | -10.29801601475232 | -3.05905638020400 | c  |
| -4.39156367690009  | 9.91551897689168   | -0.76409085176649 | c  |
| -4.56487801571500  | 10.29801601475232  | -3.05905638020400 | c  |
| 0.66030815196759   | 5.44077426516036   | -2.08583816761100 | c  |
| 1.99157123433391   | 6.19209785885533   | -3.85080986773414 | c  |
| -2.47015903356610  | -11.01993112929984 | 1.07372868685454  | c  |
| -1.99622333562324  | -12.81080382581693 | -0.36559867458105 | c  |
| 6.11567917712912   | 2.32404359201506   | 5.53447873328275  | c  |
| 4.73224694261510   | 1.05608088873429   | 3.34736131042842  | c  |
| 3.37726361594208   | -2.87829828849191  | 6.93390372011031  | c  |
| 2.04778141095782   | -5.33838392776109  | 7.66787917863518  | c  |
| -2.04778141095782  | 5.33838392776109   | 7.66787917863518  | c  |
| -3.37726361594208  | 2.87829828849191   | 6.93390372011031  | c  |
| -4.73224694261510  | -1.05608088873429  | 3.34736131042842  | c  |
| -6.11567917712912  | -2.32404359201506  | 5.53447873328275  | c  |
| -9.99534657409531  | -5.40475080398730  | 3.03150974851956  | c  |
| -11.13993266374105 | -3.11911524481235  | 2.34798988847580  | c  |
| -11.08263127523408 | -7.68953867210160  | 2.23502114764667  | c  |
| -13.33984532015223 | -3.12525971798968  | 0.89202373468007  | c  |
| -13.28820229546793 | -7.68585302335361  | 0.80236946826296  | c  |
| -14.41896854473208 | -5.40068852405210  | 0.12345567870156  | c  |
| -8.17724520017677  | -6.62407926588440  | 8.06581767395388  | c  |
| -10.47436616249354 | -5.76431258298776  | 9.06811382532231  | c  |
| -6.63823053530317  | -8.22749645962265  | 9.50402353517448  | c  |
| -11.20667785882401 | -6.48556428210548  | 11.49166787343664 | c  |
| -7.37796751960753  | -8.93805687843111  | 11.93203999551166 | c  |
| -9.65772095500867  | -8.06800819722173  | 12.92656099783192 | c  |
| 9.99534657409531   | 5.40475080398730   | 3.03150974851956  | c  |
| 11.13993266374105  | 3.11911524481235   | 2.34798988847580  | c  |
| 11.08263127523408  | 7.68953867210160   | 2.23502114764667  | c  |
| 13.33984532015223  | 3.12525971798968   | 0.89202373468007  | c  |
| 13.28820229546793  | 7.68585302335361   | 0.80236946826296  | c  |
| 14.41896854473208  | 5.40068852405210   | 0.12345567870156  | c  |
| 8.17724520017677   | 6.62407926588440   | 8.06581767395388  | c  |
| 10.47436616249354  | 5.76431258298776   | 9.06811382532231  | c  |
| 6.63823053530317   | 8.22749645962265   | 9.50402353517448  | c  |
| 11.20667785882401  | 6.48556428210548   | 11.49166787343664 | c  |

|                    |                    |                   |   |
|--------------------|--------------------|-------------------|---|
| 7.37796751960753   | 8.93805687843111   | 11.93203999551166 | c |
| 9.65772095500867   | 8.06800819722173   | 12.92656099783192 | c |
| -1.70295512992850  | 10.62743573556084  | 8.85017401788999  | c |
| -1.67800284645597  | 10.80802361926852  | 11.49425216569799 | c |
| -0.12493161375027  | 12.20071873523169  | 7.41988118631117  | c |
| -0.07909149135027  | 12.52707647992169  | 12.68602494703165 | c |
| 1.48029677742970   | 13.91160512247248  | 8.62314319247185  | c |
| 1.50337462593632   | 14.07884803113977  | 11.25262029808606 | c |
| -6.61921412758548  | 8.18050812277014   | 9.10509445212180  | c |
| -6.82014551203975  | 6.64552889838514   | 11.25678868735604 | c |
| -8.66879758053007  | 9.70546796187771   | 8.40700281520448  | c |
| -9.03839031736508  | 6.63622549163065   | 12.67962897476802 | c |
| -10.87475725981970 | 9.70917384530605   | 9.84558388019595  | c |
| -11.06471177848351 | 8.17203514668214   | 11.97903645600436 | c |
| 1.70295512992850   | -10.62743573556084 | 8.85017401788999  | c |
| 1.67800284645597   | -10.80802361926852 | 11.49425216569799 | c |
| 0.12493161375027   | -12.20071873523169 | 7.41988118631117  | c |
| 0.07909149135027   | -12.52707647992169 | 12.68602494703165 | c |
| -1.48029677742970  | -13.91160512247248 | 8.62314319247185  | c |
| -1.50337462593632  | -14.07884803113977 | 11.25262029808606 | c |
| 6.61921412758548   | -8.18050812277014  | 9.10509445212180  | c |
| 6.82014551203975   | -6.64552889838514  | 11.25678868735604 | c |
| 8.66879758053007   | -9.70546796187771  | 8.40700281520448  | c |
| 9.03839031736508   | -6.63622549163065  | 12.67962897476802 | c |
| 10.87475725981970  | -9.70917384530605  | 9.84558388019595  | c |
| 11.06471177848351  | -8.17203514668214  | 11.97903645600436 | c |
| 7.63489919752560   | -3.52246262360759  | 3.30194030635818  | c |
| 9.35360614456275   | -3.58578535534985  | 5.31783224632525  | c |
| 8.48079253528893   | -4.13838167272420  | 0.86460619108348  | c |
| 11.87202357822078  | -4.24028653473531  | 4.89627485019023  | c |
| 11.00064533094018  | -4.77785910912526  | 0.44989494980931  | c |
| 12.70096072551697  | -4.82853422105297  | 2.46482526986597  | c |
| -7.63489919752560  | 3.52246262360759   | 3.30194030635818  | c |
| -9.35360614456275  | 3.58578535534985   | 5.31783224632525  | c |
| -8.48079253528893  | 4.13838167272420   | 0.86460619108348  | c |
| -11.87202357822078 | 4.24028653473531   | 4.89627485019023  | c |
| -11.00064533094018 | 4.77785910912526   | 0.44989494980931  | c |
| -12.70096072551697 | 4.82853422105297   | 2.46482526986597  | c |
| -14.67559703086544 | 5.34851409684367   | 2.14154984856392  | h |
| 0.29948019699873   | -5.58512141980498  | 6.54772244536478  | h |
| 1.46131263425276   | -5.22014981522336  | 9.66869772414101  | h |
| -4.89165137140048  | -2.44780086642048  | 7.21880339586838  | h |
| -7.81836822814195  | -1.26478115282742  | 6.11443296167438  | h |
| -2.83029433782683  | -1.87954570409119  | 3.07610426097080  | h |
| -5.71674418380859  | -1.34520447800054  | 1.52841353319911  | h |
| 5.00545529858549   | -2.51427774643035  | 8.18243840227910  | h |
| 2.03385061807363   | -1.31313793123944  | 7.27755358794476  | h |
| -5.00545529858549  | 2.51427774643035   | 8.18243840227910  | h |
| -2.03385061807363  | 1.31313793123944   | 7.27755358794476  | h |
| -0.29948019699873  | 5.58512141980498   | 6.54772244536478  | h |
| -1.46131263425276  | 5.22014981522336   | 9.66869772414101  | h |
| 2.83029433782683   | 1.87954570409119   | 3.07610426097080  | h |
| 5.71674418380859   | 1.34520447800054   | 1.52841353319911  | h |
| 7.81836822814195   | 1.26478115282742   | 6.11443296167438  | h |
| 4.89165137140048   | 2.44780086642048   | 7.21880339586838  | h |
| -10.34635140979742 | -1.29975899236967  | 2.92377396432456  | h |
| -10.19666185004923 | -9.49095984943232  | 2.73962945656329  | h |
| -14.21125206645050 | -1.32770556972366  | 0.36214364923104  | h |
| -14.12451806534792 | -9.47862564335274  | 0.20375612345519  | h |
| -16.14650377299451 | -5.39771933799226  | -1.01179917267041 | h |
| -11.71868478280232 | -4.55781249469883  | 7.93726259436628  | h |
| -4.86831164834995  | -8.95564955943852  | 8.71380769497648  | h |
| -13.01017987024956 | -5.82733661326356  | 12.25808334440110 | h |
| -6.17204875336004  | -10.20262698833822 | 13.03655904565181 | h |
| -10.24713524602846 | -8.64484595655465  | 14.82233404756031 | h |
| 10.34635140979742  | 1.29975899236967   | 2.92377396432456  | h |
| 10.19666185004923  | 9.49095984943232   | 2.73962945656329  | h |
| 14.21125206645050  | 1.32770556972366   | 0.36214364923104  | h |
| 14.12451806534792  | 9.47862564335274   | 0.20375612345519  | h |
| 16.14650377299451  | 5.39771933799226   | -1.01179917267041 | h |
| 11.71868478280232  | 4.55781249469883   | 7.93726259436628  | h |
| 4.86831164834995   | 8.95564955943852   | 8.71380769497648  | h |
| 13.01017987024956  | 5.82733661326356   | 12.25808334440110 | h |
| 6.17204875336004   | 10.20262698833822  | 13.03655904565181 | h |
| 10.24713524602846  | 8.64484595655465   | 14.82233404756031 | h |
| -2.94341249049678  | 9.64238699677465   | 12.64151542535358 | h |
| -0.14559277515908  | 12.10598204164066  | 5.35279905834485  | h |

|                    |                    |                   |   |
|--------------------|--------------------|-------------------|---|
| -0.09235688800513  | 12.67786009906119  | 14.74780411316723 | h |
| 2.69508114437680   | 15.13703046504005  | 7.48450184802851  | h |
| 2.73726908780677   | 15.44623250877010  | 12.19242617198265 | h |
| -5.24307304469255  | 5.44906014624855   | 11.85714018034523 | h |
| -8.53871375435131  | 10.89611541009423  | 6.71904646778564  | h |
| -9.17803665404604  | 5.43703531124835   | 14.35783104379026 | h |
| -12.45625627846912 | 10.91960154943632  | 9.29276074098341  | h |
| -12.79668069020157 | 8.17599450686065   | 13.10799180271139 | h |
| 2.94341249049678   | -9.64238699677465  | 12.64151542535358 | h |
| 0.14559277515908   | -12.10598204164066 | 5.35279905834485  | h |
| 0.09235688800513   | -12.67786009906119 | 14.74780411316723 | h |
| -2.69508114437680  | -15.13703046504005 | 7.48450184802851  | h |
| -2.73726908780677  | -15.44623250877010 | 12.19242617198265 | h |
| 5.24307304469255   | -5.44906014624855  | 11.85714018034523 | h |
| 8.53871375435131   | -10.89611541009423 | 6.71904646778564  | h |
| 9.17803665404604   | -5.43703531124835  | 14.35783104379026 | h |
| 12.45625627846912  | -10.91960154943632 | 9.29276074098341  | h |
| 12.79668069020157  | -8.17599450686065  | 13.10799180271139 | h |
| 8.75966125610537   | -3.16238324088721  | 7.25059251870457  | h |
| 7.15080288283539   | -4.14569685175424  | -0.72145574870441 | h |
| 13.18803261926540  | -4.30087499972050  | 6.48861981745186  | h |
| 11.62718778415701  | -5.26445038345827  | -1.45830560776718 | h |
| 14.67559703086544  | -5.34851409684367  | 2.14154984856392  | h |
| -8.75966125610537  | 3.16238324088721   | 7.25059251870457  | h |
| -7.15080288283539  | 4.14569685175424   | -0.72145574870441 | h |
| -13.18803261926540 | 4.30087499972050   | 6.48861981745186  | h |
| -11.62718778415701 | 5.26445038345827   | -1.45830560776718 | h |
| -2.06521494270018  | -14.96504660810237 | -2.16178453682031 | c |
| -0.30265471240154  | -17.25283739393210 | -1.45988428967328 | c |
| -4.74146405909413  | -16.22203454397654 | -2.10517115707422 | c |
| -1.71566202207549  | -19.55934318076450 | -2.67935823367482 | c |
| -0.75188435478327  | -17.75459277260739 | 1.38099150647301  | c |
| -4.22478528567560  | -18.95322636671324 | -1.30402697569600 | c |
| -6.04532791513176  | -15.24485370971155 | -0.81145244000535 | h |
| -5.53683097494785  | -16.09481695660455 | -4.02194115127892 | h |
| 0.68323326597533   | -19.08680542502563 | 2.08903127961512  | h |
| -0.54913079104475  | -16.01211975496200 | 2.50360258181148  | h |
| -3.44423710834731  | -18.89375951166177 | 1.49380217851552  | c |
| -5.80525790987641  | -20.24331702641375 | -1.72340850258844 | h |
| -3.44479855170160  | -20.79915842970364 | 2.33325752064915  | h |
| -4.76043616039930  | -17.73639668760948 | 2.62486550403494  | h |
| 2.06521494270018   | 14.96504660810237  | -2.16178453682031 | c |
| 0.30265471240154   | 17.25283739393210  | -1.45988428967328 | c |
| 4.74146405909413   | 16.22203454397654  | -2.10517115707422 | c |
| 1.71566202207549   | 19.55934318076450  | -2.67935823367482 | c |
| 0.75188435478327   | 17.75459277260739  | 1.38099150647301  | c |
| 4.22478528567560   | 18.95322636671324  | -1.30402697569600 | c |
| 6.04532791513176   | 15.24485370971155  | -0.81145244000535 | h |
| 5.53683097494785   | 16.09481695660455  | -4.02194115127892 | h |
| -0.68323326597533  | 19.08680542502563  | 2.08903127961512  | h |
| 0.54913079104475   | 16.01211975496200  | 2.50360258181148  | h |
| 3.44423710834731   | 18.89375951166177  | 1.49380217851552  | c |
| 5.80525790987641   | 20.24331702641375  | -1.72340850258844 | h |
| 3.44479855170160   | 20.79915842970364  | 2.33325752064915  | h |
| 4.76043616039930   | 17.73639668760948  | 2.62486550403494  | h |
| 4.86092402596950   | -10.92055041337862 | -5.76555016196989 | c |
| 6.22947469693845   | -8.78235021300919  | -7.31177008925456 | c |
| 6.65490022212791   | -13.22131886654712 | -6.20617346038192 | c |
| 7.37800739965019   | -10.27373688189818 | -9.60197521179190 | c |
| 8.64135577807775   | -8.12730985483038  | -5.79569069435971 | c |
| 8.78284127332536   | -12.16499629920343 | -7.86401990825208 | c |
| 5.56330644152431   | -14.70195636314208 | -7.17475871323793 | h |
| 9.48248640501797   | -6.37863072824327  | -6.55565747963585 | h |
| 8.19835350803560   | -7.76721782287180  | -3.79356142314540 | h |
| 10.39383575332779  | -10.43654432283530 | -6.17916902523535 | c |
| 9.86336181639421   | -13.64706153809484 | -8.84992623284360 | h |
| 12.18233996828549  | -9.90977864118488  | -7.10655509277451 | h |
| 10.89507151755329  | -11.37083157961254 | -4.38446641495538 | h |
| -4.86092402596950  | 10.92055041337862  | -5.76555016196989 | c |
| -6.22947469693845  | 8.78235021300919   | -7.31177008925456 | c |
| -6.65490022212791  | 13.22131886654712  | -6.20617346038192 | c |
| -7.37800739965019  | 10.27373688189818  | -9.60197521179190 | c |
| -8.64135577807775  | 8.12730985483038   | -5.79569069435971 | c |
| -8.78284127332536  | 12.16499629920343  | -7.86401990825208 | c |
| -5.56330644152431  | 14.70195636314208  | -7.17475871323793 | h |
| -9.48248640501797  | 6.37863072824327   | -6.55565747963585 | h |
| -8.19835350803560  | 7.76721782287180   | -3.79356142314540 | h |

|                    |                    |                    |   |
|--------------------|--------------------|--------------------|---|
| -10.39383575332779 | 10.43654432283530  | -6.17916902523535  | c |
| -9.86336181639421  | 13.64706153809484  | -8.84992623284360  | h |
| -12.18233996828549 | 9.90977864118488   | -7.10655509277451  | h |
| -10.89507151755329 | 11.37083157961254  | -4.38446641495538  | h |
| 3.49014740107134   | 7.02942049072935   | -6.05916706880820  | c |
| 6.38180762328151   | 7.38209832849810   | -5.46183151603067  | c |
| 3.54113943149680   | 4.98851181540117   | -8.30404149000375  | c |
| 7.50853647874200   | 7.16938823477487   | -8.12632953962871  | c |
| 7.35438163379840   | 4.91809389232312   | -4.23147564791094  | c |
| 6.42272980761494   | 4.54871769081934   | -8.65968205381753  | c |
| 9.59472694651351   | 7.20789690847213   | -8.09836332215542  | h |
| 6.83413490598105   | 8.66459857004861   | -9.40561714187205  | h |
| 9.21590952741627   | 5.27112841559478   | -3.35974207394612  | h |
| 6.08492167612677   | 4.27078896262706   | -2.70778300772545  | h |
| 7.54614310411009   | 3.03511328903047   | -6.45887527975529  | c |
| 6.84425744039346   | 3.73834956301560   | -10.53120628229476 | h |
| 9.53650416312757   | 2.57683053602875   | -6.87806964451411  | h |
| 6.57390971116222   | 1.22771480609650   | -6.11264594774967  | h |
| -3.49014740107134  | -7.02942049072935  | -6.05916706880820  | c |
| -6.38180762328151  | -7.38209832849810  | -5.46183151603067  | c |
| -3.54113943149680  | -4.98851181540117  | -8.30404149000375  | c |
| -7.50853647874200  | -7.16938823477487  | -8.12632953962871  | c |
| -7.35438163379840  | -4.91809389232312  | -4.23147564791094  | c |
| -6.42272980761494  | -4.54871769081934  | -8.65968205381753  | c |
| -9.59472694651351  | -7.20789690847213  | -8.09836332215542  | h |
| -6.83413490598105  | -8.66459857004861  | -9.40561714187205  | h |
| -9.21590952741627  | -5.27112841559478  | -3.35974207394612  | h |
| -6.08492167612677  | -4.27078896262706  | -2.70778300772545  | h |
| -7.54614310411009  | -3.03511328903047  | -6.45887527975529  | c |
| -6.84425744039346  | -3.73834956301560  | -10.53120628229476 | h |
| -9.53650416312757  | -2.57683053602875  | -6.87806964451411  | h |
| -6.57390971116222  | -1.22771480609650  | -6.11264594774967  | h |
| 1.65986521161425   | 13.97675938694320  | -4.61988774862091  | o |
| -0.13247906554643  | 13.59080039521669  | -4.94797200160865  | h |
| 2.38385815499951   | 9.28590562503658   | -6.98456864335139  | o |
| 2.73425081298584   | 10.73014822719297  | -5.86479459607120  | h |
| -1.65986521161425  | -13.97675938694320 | -4.61988774862091  | o |
| 0.13247906554643   | -13.59080039521669 | -4.94797200160865  | h |
| -2.38385815499951  | -9.28590562503658  | -6.98456864335139  | o |
| -2.73425081298584  | -10.73014822719297 | -5.86479459607120  | h |
| -7.36154236310161  | 14.02313453407191  | -4.42134392702270  | h |
| 7.36154236310161   | -14.02313453407191 | -4.42134392702270  | h |
| -2.43500446568035  | 11.57610853926610  | -6.71217501834773  | o |
| -1.30871909099003  | 10.10999116878947  | -6.88662571884639  | h |
| 2.43500446568035   | -11.57610853926610 | -6.71217501834773  | o |
| 1.30871909099003   | -10.10999116878947 | -6.88662571884639  | h |
| -2.44876592114241  | 16.89273247451771  | -2.14835178999537  | c |
| -2.71858672313810  | 16.68006041742564  | -4.20484985238535  | h |
| -3.25563363914684  | 15.21036815939505  | -1.21205715261477  | h |
| -3.56781950835654  | 18.54808653811970  | -1.54927111028242  | h |
| 7.04959062604843   | 9.74862982961958   | -4.00109477811429  | c |
| 6.48176239360911   | 11.48272769218562  | -5.01011796468768  | h |
| 6.15603914196185   | 9.77245969361731   | -2.11761814034315  | h |
| 9.11709884304880   | 9.84452600910362   | -3.73429428391388  | h |
| 2.44876592114241   | -16.89273247451771 | -2.14835178999537  | c |
| 2.71858672313810   | -16.68006041742564 | -4.20484985238535  | h |
| 3.25563363914684   | -15.21036815939505 | -1.21205715261477  | h |
| 3.56781950835654   | -18.54808653811970 | -1.54927111028242  | h |
| 4.58200403544017   | -6.51529861847098  | -7.87364757606927  | c |
| 3.79898230934259   | -5.69400762194263  | -6.11812856619405  | h |
| 5.67975536700706   | -5.02677365989865  | -8.83908060271006  | h |
| 2.98589029913892   | -7.00611268012881  | -9.11924336308403  | h |
| -7.04959062604843  | -9.74862982961958  | -4.00109477811429  | c |
| -6.48176239360911  | -11.48272769218562 | -5.01011796468768  | h |
| -6.15603914196185  | -9.77245969361731  | -2.11761814034315  | h |
| -9.11709884304880  | -9.84452600910362  | -3.73429428391388  | h |
| -4.58200403544017  | 6.51529861847098   | -7.87364757606927  | c |
| -3.79898230934259  | 5.69400762194263   | -6.11812856619405  | h |
| -5.67975536700706  | 5.02677365989865   | -8.83908060271006  | h |
| -2.98589029913892  | 7.00611268012881   | -9.11924336308403  | h |
| 1.90602316401491   | 19.54239801743196  | -5.56775326565171  | c |
| 0.02555103967957   | 19.85948142605928  | -6.41721516263398  | h |
| 3.12972101927541   | 21.11211914390198  | -6.19772579101603  | h |
| 2.64196419602072   | 17.77161744949484  | -6.35844061770053  | h |
| 0.58499701390700   | 22.12598509939811  | -1.95722423375394  | c |
| 1.81945714401550   | 23.65547877940000  | -2.65783503465847  | h |
| -1.27831400893936  | 22.38599560408434  | -2.85970597557131  | h |



|                    |                    |                    |   |
|--------------------|--------------------|--------------------|---|
| 0.33750109980510   | 22.41987192342842  | 0.08679169481052   | h |
| -0.58499701390700  | -22.12598509939811 | -1.95722423375394  | c |
| -1.81945714401550  | -23.65547877940000 | -2.65783503465847  | h |
| 1.27831400893936   | -22.38599560408434 | -2.85970597557131  | h |
| -0.33750109980510  | -22.41987192342842 | 0.08679169481052   | h |
| -1.90602316401491  | -19.54239801743196 | -5.56775326565171  | c |
| -2.64196419602072  | -17.77161744949484 | -6.35844061770053  | h |
| -0.02555103967957  | -19.85948142605928 | -6.41721516263398  | h |
| -3.12972101927541  | -21.11211914390198 | -6.19772579101603  | h |
| 2.08932885297553   | 2.56808016514369   | -7.70927153770622  | c |
| 2.59170717498784   | 1.72723737887668   | -5.87303783121482  | h |
| 0.03715495200151   | 2.92648567488614   | -7.66867753049770  | h |
| 2.45753019701468   | 1.14797643490504   | -9.19357046325743  | h |
| 2.45859631830702   | 6.08335673471066   | -10.75693784000506 | c |
| 2.58076052234534   | 4.62817174863749   | -12.24762941413131 | h |
| 0.45855985939829   | 6.61071642540662   | -10.54630524755928 | h |
| 3.47471423893539   | 7.77282150497496   | -11.41242660259691 | h |
| -2.45859631830702  | -6.08335673471066  | -10.75693784000506 | c |
| -0.45855985939829  | -6.61071642540662  | -10.54630524755928 | h |
| -3.47471423893539  | -7.77282150497496  | -11.41242660259691 | h |
| -2.58076052234534  | -4.62817174863749  | -12.24762941413131 | h |
| -2.08932885297553  | -2.56808016514369  | -7.70927153770622  | c |
| -2.59170717498784  | -1.72723737887668  | -5.87303783121482  | h |
| -0.03715495200151  | -2.92648567488614  | -7.66867753049770  | h |
| -2.45753019701468  | -1.14797643490504  | -9.19357046325743  | h |
| 5.48222083215414   | -11.50687726896848 | -11.40865147694921 | c |
| 4.40880776885244   | -10.04687176206501 | -12.44545970967081 | h |
| 6.51172001418650   | -12.63106366916206 | -12.83463818113729 | h |
| 4.09675002144654   | -12.73600956182669 | -10.47611801307521 | h |
| 9.13735384306969   | -8.66935709714468  | -11.25147123874848 | c |
| 10.10984025607248  | -9.89080584789577  | -12.63567105063129 | h |
| 8.03784104440347   | -7.26915339834863  | -12.34025719190959 | h |
| 10.60523478498981  | -7.63462509338671  | -10.20225770772379 | h |
| -9.13735384306969  | 8.66935709714468   | -11.25147123874848 | c |
| -10.10984025607248 | 9.89080584789577   | -12.63567105063129 | h |
| -8.03784104440347  | 7.26915339834863   | -12.34025719190959 | h |
| -10.60523478498981 | 7.63462509338671   | -10.20225770772379 | h |
| -5.48222083215414  | 11.50687726896848  | -11.40865147694921 | c |
| -4.09675002144654  | 12.73600956182669  | -10.47611801307521 | h |
| -4.40880776885244  | 10.04687176206501  | -12.44545970967081 | h |
| -6.51172001418650  | 12.63106366916206  | -12.83463818113729 | h |

**[Au<sub>3</sub>Cu(C<sub>2</sub>C<sub>10</sub>H<sub>17</sub>O)<sub>3</sub>(Ph<sub>2</sub>P(CH<sub>2</sub>)<sub>2</sub>PPh(CH<sub>2</sub>)<sub>2</sub>PPh<sub>2</sub>)]<sub>2</sub><sup>2+</sup> (4 high temperature isomer)**

|                    |                    |                   |    |
|--------------------|--------------------|-------------------|----|
| -3.92020115175969  | -7.74367800952755  | 3.81499310270926  | au |
| 15.44446155314793  | -2.96513576989723  | 2.66150698239963  | au |
| 4.75122101473017   | -4.36642460919295  | -2.58081269227954 | au |
| -4.75122101473017  | 4.36642460919295   | 2.58081269227954  | au |
| -15.44446155314793 | 2.96513576989723   | -2.66150698239963 | au |
| 3.92020115175969   | 7.74367800952755   | -3.81499310270926 | au |
| 0.44140646560871   | -8.71099452282094  | -0.87441886397851 | cu |
| -0.44140646560871  | 8.71099452282094   | 0.87441886397851  | cu |
| -7.16156332506546  | -5.53738168859105  | 5.77540979199912  | p  |
| -8.14041216471382  | 1.80837793411862   | 1.51255558494529  | p  |
| -12.18896292294406 | 5.83348478722734   | -3.15197233008292 | p  |
| 12.18896292294406  | -5.83348478722734  | 3.15197233008292  | p  |
| 8.14041216471382   | -1.80837793411862  | -1.51255558494529 | p  |
| 7.16156332506546   | 5.53738168859105   | -5.77540979199912 | p  |
| 1.32088773786629   | 10.02121677027500  | -2.25265780633817 | c  |
| 1.99967265713271   | -6.70724346216927  | -3.73741415430573 | c  |
| 17.94197054829274  | -0.26671194046551  | 1.91488470025752  | c  |
| -17.94197054829274 | 0.26671194046551   | -1.91488470025752 | c  |
| -1.99967265713271  | 6.70724346216927   | 3.73741415430573  | c  |
| -1.32088773786629  | -10.02121677027500 | 2.25265780633817  | c  |
| 7.33428333740904   | 2.13421696183462   | -5.00271747553852 | c  |
| 7.62311625603319   | 1.58787112138721   | -2.19115897168143 | c  |
| 8.87490831719682   | -1.66484153198497  | 1.89432026284901  | c  |
| 9.12907891416297   | -4.11897663111385  | 3.39882610877600  | c  |
| -9.12907891416297  | 4.11897663111385   | -3.39882610877600 | c  |
| -8.87490831719682  | 1.66484153198497   | -1.89432026284901 | c  |
| -7.62311625603319  | -1.58787112138721  | 2.19115897168143  | c  |
| -7.33428333740904  | -2.13421696183462  | 5.00271747553852  | c  |
| -6.89585810979348  | -5.54255606368752  | 9.21097964373915  | c  |
| -9.03879011438636  | -5.62110144193536  | 10.76229251383062 | c  |

|                    |                    |                    |   |
|--------------------|--------------------|--------------------|---|
| -4.48739497726864  | -5.40984680932553  | 10.30627863381875  | c |
| -8.76839343247545  | -5.54824890045268  | 13.38176319142433  | c |
| -4.22947287792538  | -5.32536051928195  | 12.92510190524980  | c |
| -6.36958189678886  | -5.39524439160196  | 14.46367121834885  | c |
| -10.23072502129181 | -6.87987659568516  | 4.995394542215763  | c |
| -10.37520780892657 | -9.49002627511476  | 4.55292290242972   | c |
| -12.43807766413950 | -5.41826112046398  | 4.85759229721816   | c |
| -12.68868945539526 | -10.61398519288869 | 3.99309961006766   | c |
| -14.74657386298242 | -6.53865875824811  | 4.25018097497502   | c |
| -14.86737497050257 | -9.13881599632941  | 3.82745198419636   | c |
| 6.89585810979348   | 5.54255606368752   | -9.21097964373915  | c |
| 9.03879011438636   | 5.62110144193536   | -10.76229251383062 | c |
| 4.48739497726864   | 5.40984680932553   | -10.30627863381875 | c |
| 8.76839343247545   | 5.54824890045268   | -13.38176319142433 | c |
| 4.22947287792538   | 5.32536051928195   | -12.92510190524980 | c |
| 6.36958189678886   | 5.39524439160196   | -14.46367121834885 | c |
| 10.23072502129181  | 6.87987659568516   | -4.995394542215763 | c |
| 10.37520780892657  | 9.49002627511476   | -4.55292290242972  | c |
| 12.43807766413950  | 5.41826112046398   | -4.85759229721816  | c |
| 12.68868945539526  | 10.61398519288869  | -3.99309961006766  | c |
| 14.74657386298242  | 6.53865875824811   | -4.25018097497502  | c |
| 14.86737497050257  | 9.13881599632941   | -3.82745198419636  | c |
| 11.88064636973520  | -8.10447681162884  | 0.57718379116493   | c |
| 14.08630262801135  | -8.84298970154585  | -0.69143763195989  | c |
| 9.57376196209126   | -9.22207935547755  | -0.09212211660371  | c |
| 13.98357277542678  | -10.67526045235565 | -2.58068516809179  | c |
| 9.47055688034704   | -11.04886431127992 | -1.98999182729575  | c |
| 11.67910390006419  | -11.77841474846484 | -3.23266410189214  | c |
| 12.21838984083488  | -7.70279022489084  | 6.05745981358555   | c |
| 11.19050734569592  | -10.13683319345203 | 6.20397022390753   | c |
| 13.31073765455890  | -6.61625827347531  | 8.21396914241858   | c |
| 11.23075741351644  | -11.45010068918764 | 8.48801067162296   | c |
| 13.33626890424450  | -7.93250626856365  | 10.49460275276562  | c |
| 12.29519179255380  | -10.35067497470372 | 10.63405782790855  | c |
| -11.88064636973520 | 8.10447681162884   | -0.57718379116493  | c |
| -14.08630262801135 | 8.84298970154585   | 0.69143763195989   | c |
| -9.57376196209126  | 9.22207935547755   | 0.09212211660371   | c |
| -13.98357277542678 | 10.67526045235565  | 2.58068516809179   | c |
| -9.47055688034704  | 11.04886431127992  | 1.98999182729575   | c |
| -11.67910390006419 | 11.77841474846484  | 3.23266410189214   | c |
| -12.21838984083488 | 7.70279022489084   | -6.05745981358555  | c |
| -11.19050734569592 | 10.13683319345203  | -6.20397022390753  | c |
| -13.31073765455890 | 6.61625827347531   | -8.21396914241858  | c |
| -11.23075741351644 | 11.45010068918764  | -8.48801067162296  | c |
| -13.33626890424450 | 7.93250626856365   | -10.49460275276562 | c |
| -12.29519179255380 | 10.35067497470372  | -10.63405782790855 | c |
| -10.98438512711992 | 2.55326635137671   | 3.28858729056711   | c |
| -13.20433030987937 | 1.15229569942327   | 2.91987011602583   | c |
| -10.93343703290351 | 4.45193523085953   | 5.13514568773455   | c |
| -15.33802921855936 | 1.64183286755162   | 4.38380174354805   | c |
| -13.06866022202720 | 4.92780216480400   | 6.60188320662239   | c |
| -15.26786097941903 | 3.52191936144295   | 6.23077393037595   | c |
| 10.98438512711992  | -2.55326635137671  | -3.28858729056711  | c |
| 13.20433030987937  | -1.15229569942327  | -2.91987011602583  | c |
| 10.93343703290351  | -4.45193523085953  | -5.13514568773455  | c |
| 15.33802921855936  | -1.64183286755162  | -4.38380174354805  | c |
| 13.06866022202720  | -4.92780216480400  | -6.60188320662239  | c |
| 15.26786097941903  | -3.52191936144295  | -6.23077393037595  | c |
| 16.94265608671870  | -3.90228196301661  | -7.38184625320724  | h |
| -5.57547113021858  | -1.29462277118310  | 5.75141015796585   | h |
| -8.90111097825856  | -1.31028393747422  | 6.10813876898065   | h |
| 8.90111097825856   | 1.31028393747422   | -6.10813876898065  | h |
| 5.57547113021858   | 1.29462277118310   | -5.75141015796585  | h |
| 9.24755368804457   | 2.63014216556263   | -1.39097933675770  | h |
| 5.92292537329848   | 2.19101967750382   | -1.13947347787114  | h |
| 10.58731784623266  | -0.49034289867166  | 2.13430807366409   | h |
| 7.27879753573737   | -0.57226160080142  | 2.68772572294644   | h |
| -7.53415520588535  | 5.41603684340438   | -3.04451873940566  | h |
| -9.02819300060358  | 3.62163693486721   | -5.42311406662379  | h |
| -7.27879753573737  | 0.57226160080142   | -2.68772572294644  | h |
| -10.58731784623266 | 0.49034289867166   | -2.13430807366409  | h |
| -9.24755368804457  | -2.63014216556263  | 1.39097933675770   | h |
| -5.92292537329848  | -2.19101967750382  | 1.13947347787114   | h |
| 9.02819300060358   | -3.62163693486721  | 5.42311406662379   | h |
| 7.53415520588535   | -5.41603684340438  | 3.04451873940566   | h |
| -10.92647101520282 | -5.76648811572995  | 9.93063031417234   | h |
| -2.79963619669195  | -5.39592175587788  | 9.10651330173856   | h |

|                    |                    |                    |   |
|--------------------|--------------------|--------------------|---|
| -10.44665730103696 | -5.62521308304632  | 14.58592693691987  | h |
| -2.34566415402281  | -5.23006096770620  | 13.77064355546690  | h |
| -6.16559959329091  | -5.34957746969778  | 16.52031533215713  | h |
| -8.66608525422676  | -10.65382373569367 | 4.64832812480348   | h |
| -12.38864574236767 | -3.38259103579583  | 5.21419020929849   | h |
| -12.78451485423355 | -12.65259468901154 | 3.66556746396016   | h |
| -16.45861202631722 | -5.38603547901331  | 4.07100204742717   | h |
| -16.67924042582302 | -10.01602506466550 | 3.35658149433460   | h |
| 10.92647101520282  | 5.76648811572995   | -9.93063031417234  | h |
| 2.79963619669195   | 5.39592175587788   | -9.10651330173856  | h |
| 10.44665730103696  | 5.62521308304632   | -14.58592693691987 | h |
| 2.34566415402281   | 5.23006096770620   | -13.77064355546690 | h |
| 6.16559959329091   | 5.34957746969778   | -16.52031533215713 | h |
| 8.66608525422676   | 10.65382373569367  | -4.64832812480348  | h |
| 12.38864574236767  | 3.38259103579583   | -5.21419020929849  | h |
| 12.78451485423355  | 12.65259468901154  | -3.66556746396016  | h |
| 16.45861202631722  | 5.38603547901331   | -4.07100204742717  | h |
| 16.67924042582302  | 10.01602506466550  | -3.35658149433460  | h |
| 15.89810650045993  | -7.97473394460553  | -0.19642942925505  | h |
| 7.81952563176679   | -8.71785807878257  | 0.87838179740871   | h |
| 15.71984019275484  | -11.24514010982853 | -3.54678033350303  | h |
| 7.65209531046902   | -11.91845512138626 | -2.45394473026394  | h |
| 11.60612318412908  | -13.22433281866617 | -4.70910785253734  | h |
| 10.38097775800706  | -11.03612293506259 | 4.52775400585891   | h |
| 14.17894947278346  | -4.73981070080235  | 8.10034213700208   | h |
| 10.43753824686128  | -13.35709746782485 | 8.58345120404861   | h |
| 14.20428078568370  | -7.07573552466173  | 12.16350852923985  | h |
| 12.33782873280886  | -11.39336140010091 | 12.41871738902363  | h |
| -15.89810650045993 | 7.97473394460553   | 0.19642942925505   | h |
| -7.81952563176679  | 8.71785807878257   | -0.87838179740871  | h |
| -15.71984019275484 | 11.24514010982853  | 3.54678033350303   | h |
| -7.65209531046902  | 11.91845512138626  | 2.45394473026394   | h |
| -11.60612318412908 | 13.22433281866617  | 4.70910785253734   | h |
| -10.38097775800706 | 11.03612293506259  | -4.52775400585891  | h |
| -14.17894947278346 | 4.73981070080235   | -8.10034213700208  | h |
| -10.43753824686128 | 13.35709746782485  | -8.58345120404861  | h |
| -14.20428078568370 | 7.07573552466173   | -12.16350852923985 | h |
| -12.33782873280886 | 11.39336140010091  | -12.41871738902363 | h |
| -13.32363382056011 | -0.33441990083192  | 1.48808252374921   | h |
| -9.21830973377209  | 5.57256701545775   | 5.42153762209368   | h |
| -17.05319158546119 | 0.54415549157944   | 4.03344358309372   | h |
| -13.01254686037779 | 6.41216006008907   | 8.03847866905893   | h |
| -16.94265608671870 | 3.90228196301661   | 7.38184625320724   | h |
| 13.32363382056011  | 0.33441990083192   | -1.48808252374921  | h |
| 9.21830973377209   | -5.57256701545775  | -5.42153762209368  | h |
| 17.05319158546119  | -0.54415549157944  | -4.03344358309372  | h |
| 13.01254686037779  | -6.41216006008907  | -8.03847866905893  | h |
| 19.28719111645013  | 1.49055382657567   | 1.22320355569304   | c |
| 0.63800825710024   | -8.29696340497996  | -4.81688508654422  | c |
| -0.00034299541878  | -11.83659356477601 | 1.53650308969225   | c |
| 0.00034299541878   | 11.83659356477601  | -1.53650308969225  | c |
| -0.63800825710024  | 8.29696340497996   | 4.81688508654422   | c |
| -19.28719111645013 | -1.49055382657567  | -1.22320355569304  | c |
| -20.83578754766163 | -3.57237027099600  | -0.22778724308442  | c |
| -23.72187330119158 | -3.33000742784429  | -0.91539118702857  | c |
| -20.15340436028795 | -6.19959997531568  | -1.35988926331712  | c |
| -20.41627256605902 | -3.68519298691425  | 2.44443715678847   | o |
| -24.66693246473443 | -6.13611885534444  | -0.76956082254886  | c |
| -23.80875071935284 | -2.84947574090701  | -3.79337596891792  | c |
| -25.11078363598777 | -1.36122545502277  | 0.63086708926811   | c |
| -22.60712287489142 | -7.08362922425203  | -2.62274592814306  | c |
| -18.56844321633082 | -6.07701006592114  | -2.70211122970480  | h |
| -19.57226344929903 | -7.45313497293340  | 0.19660243836636   | h |
| -21.03747158594934 | -2.11198281591409  | 3.15249435595195   | h |
| -27.36870530996451 | -6.50440818612757  | -1.74786974591526  | c |
| -24.58351426299436 | -7.38516206174214  | 1.84064432454869   | c |
| -25.73702562264300 | -2.30298266439009  | -4.35972404195288  | h |
| -22.55487300229330 | -1.28082007997047  | -4.33691125763994  | h |
| -23.01482638178933 | -5.41027458859059  | -4.96318651402622  | c |
| -24.23695794918387 | 0.52273788628981   | 0.39490160462311   | h |
| -27.09612589425761 | -1.20001249123196  | 0.01248150135315   | h |
| -25.14512251419707 | -1.83202328329902  | 2.66523369757787   | h |
| -22.64215664594518 | -9.12936265539989  | -3.01832876243517  | h |
| -27.71613371014661 | -5.71427221705453  | -3.63934990078647  | h |
| -27.81482782867889 | -8.54161153428183  | -1.843469794687083 | h |
| -28.74469427187181 | -5.63370457628216  | -0.44228258389062  | h |
| -25.07881160499083 | -9.40650433540432  | 1.66459723604312   | h |

|                    |                    |                   |   |
|--------------------|--------------------|-------------------|---|
| -22.74894170810863 | -7.22725302720306  | 2.79457959012052  | h |
| -26.00521936819652 | -6.52062625222395  | 3.10247075469942  | h |
| -24.48965521269807 | -6.18556464352906  | -6.21246613818944 | h |
| -21.27702062473730 | -5.25968388699133  | -6.10409656871618 | h |
| 20.83578754766163  | 3.57237027099600   | 0.22778724308442  | c |
| 23.72187330119158  | 3.33000742784429   | 0.91539118702857  | c |
| 20.15340436028795  | 6.19959997531568   | 1.35988926331712  | c |
| 20.41627256605902  | 3.68519298691425   | -2.44443715678847 | o |
| 24.66693246473443  | 6.13611885534444   | 0.76956082254886  | c |
| 23.80875071935284  | 2.84947574090701   | 3.79337596891792  | c |
| 25.11078363598777  | 1.36122545502277   | -0.63086708926811 | c |
| 22.60712287489142  | 7.08362922425203   | 2.62274592814306  | c |
| 18.56844321633082  | 6.07701006592114   | 2.70211122970480  | h |
| 19.57226344929903  | 7.45313497293340   | -0.19660243836636 | h |
| 21.03747158594934  | 2.11198281591409   | -3.15249435595195 | h |
| 27.36870530996451  | 6.50440818612757   | 1.74786974591526  | c |
| 24.58351426299436  | 7.38516206174214   | -1.84064432454869 | c |
| 25.73702562264300  | 2.30298266439009   | 4.35972404195288  | h |
| 22.55487300229330  | 1.28082007997047   | 4.33691125763994  | h |
| 23.01482638178933  | 5.41027458859059   | 4.96318651402622  | c |
| 24.23695794918387  | -0.52273788628981  | -0.39490160462311 | h |
| 27.09612589425761  | 1.20001249123196   | -0.01248150135315 | h |
| 25.14512251419707  | 1.83202328329902   | -2.66523369757787 | h |
| 22.64215664594518  | 9.12936265539989   | 3.01832876243517  | h |
| 27.71613371014661  | 5.71427221705453   | 3.63934990078647  | h |
| 27.81482782867889  | 8.54161153428183   | 1.83469794687083  | h |
| 28.74469427187181  | 5.63370457628216   | 0.44228258389062  | h |
| 25.07881160499083  | 9.40650433540432   | -1.66459723604312 | h |
| 22.74894170810863  | 7.22725302720306   | -2.79457959012052 | h |
| 26.00521936819652  | 6.52062625222395   | -3.10247075469942 | h |
| 24.48965521269807  | 6.18556464352906   | 6.21246613818944  | h |
| 21.27702062473730  | 5.25968388699133   | 6.10409656871618  | h |
| 1.41545275243202   | -14.14970130052583 | 0.79798317414919  | c |
| 2.95848685121183   | -15.32257599120061 | 3.03431044815708  | c |
| -0.41238138084375  | -16.36696119998056 | 0.08169630097808  | c |
| 3.05571132527536   | -13.46422681110904 | -1.20273886411789 | o |
| 3.17909937254228   | -18.17025222294188 | 2.21923838766276  | c |
| 1.11131172344249   | -15.52399327288828 | 5.29037540603783  | c |
| 5.36973894895131   | -13.90783422065069 | 3.63184207734376  | c |
| 0.28164446519092   | -18.48070484582955 | 1.94051979829768  | c |
| -2.41745812386465  | -15.82149287155571 | 0.23893862290202  | h |
| -0.05874983682293  | -16.91532271264818 | -1.89567653377504 | h |
| 2.02766627554693   | -13.25022818683706 | -2.73572255864209 | h |
| 4.34082343907094   | -19.86041464853513 | 4.26535463774502  | c |
| 4.66821742393483   | -18.70702667144889 | -0.20375854595582 | c |
| 2.17841360126338   | -15.97576773527236 | 7.01974887327383  | h |
| 0.14218039570547   | -13.71999764612517 | 5.66312672348097  | h |
| -0.71620400848045  | -17.68249571447497 | 4.54627364389600  | c |
| 4.95395155770913   | -11.94268078283249 | 4.20776917527016  | h |
| 6.37244948743688   | -14.82264458236154 | 5.21703247553178  | h |
| 6.64893099832317   | -13.84686639855967 | 1.99073988089468  | h |
| -0.35685712686941  | -20.36197943674458 | 1.31648927707720  | h |
| 3.49918619468272   | -19.63883905735088 | 6.15361575362625  | h |
| 4.12961040338776   | -21.86409482928313 | 3.72334924391311  | h |
| 6.38669266175567   | -19.48924704747856 | 4.44118209459663  | h |
| 4.61337989724448   | -20.75304664987592 | -0.61311905200324 | h |
| 3.97824502452526   | -17.68719925788737 | -1.87163095510224 | h |
| 6.67283049832005   | -18.18214709138765 | 0.04350983130742  | h |
| -0.64986132797799  | -19.25790097376699 | 5.90506736356985  | h |
| -2.70299272045973  | -17.05927768995264 | 4.45053939866312  | h |
| -1.41545275243202  | 14.14970130052583  | -0.79798317414919 | c |
| -2.95848685121183  | 15.32257599120061  | -3.03431044815708 | c |
| 0.41238138084375   | 16.36696119998056  | -0.08169630097808 | c |
| -3.05571132527536  | 13.46422681110904  | 1.20273886411789  | o |
| -3.17909937254228  | 18.17025222294188  | -2.21923838766276 | c |
| -1.11131172344249  | 15.52399327288828  | -5.29037540603783 | c |
| -5.36973894895131  | 13.90783422065069  | -3.63184207734376 | c |
| -0.28164446519092  | 18.48070484582955  | -1.94051979829768 | c |
| 2.41745812386465   | 15.82149287155571  | -0.23893862290202 | h |
| 0.05874983682293   | 16.91532271264818  | 1.89567653377504  | h |
| -2.02766627554693  | 13.25022818683706  | 2.73572255864209  | h |
| 4.34082343907094   | 19.86041464853513  | -4.26535463774502 | c |
| -4.66821742393483  | 18.70702667144889  | 0.20375854595582  | c |
| -2.17841360126338  | 15.97576773527236  | -7.01974887327383 | h |
| 0.14218039570547   | 13.71999764612517  | -5.66312672348097 | h |
| -0.71620400848045  | 17.68249571447497  | -4.54627364389600 | c |
| -4.95395155770913  | 11.94268078283249  | -4.20776917527016 | h |

|                   |                    |                    |   |
|-------------------|--------------------|--------------------|---|
| -6.37244948743688 | 14.82264458236154  | -5.21703247553178  | h |
| -6.64893099832317 | 13.84686639855967  | -1.99073988089468  | h |
| 0.35685712686941  | 20.36197943674458  | -1.31648927707720  | h |
| -3.49918619468272 | 19.63883905735088  | -6.15361575362625  | h |
| -4.12961040338776 | 21.86409482928313  | -3.72334924391311  | h |
| -6.38669266175567 | 19.48924704747856  | -4.44118209459663  | h |
| -4.61337989724448 | 20.75304664987592  | 0.61311905200324   | h |
| -3.97824502452526 | 17.68719925788737  | 1.87163095510224   | h |
| -6.67283049832005 | 18.18214709138765  | -0.04350983130742  | h |
| 0.64986132797799  | 19.25790097376699  | -5.90506736356985  | h |
| 2.70299272045973  | 17.05927768995264  | -4.45053939866312  | h |
| -0.61726209763656 | -10.21614123457803 | -6.43311194577045  | c |
| -3.34258253380835 | -9.47367187363363  | -7.33235706230096  | c |
| 0.81318475182921  | -10.57336617423881 | -8.98287982885189  | c |
| -0.57760336317302 | -12.54118528025761 | -5.05464527319777  | o |
| -3.64114852029180 | -11.05993822702531 | -9.82496520420371  | c |
| -3.11078432414150 | -6.76424234279334  | -8.40124390957932  | c |
| -5.36585223018008 | -9.74723619454620  | -5.32036641406019  | c |
| -1.18802751698887 | -9.97124608557889  | -10.99301909239159 | c |
| 2.47712235408395  | -9.33319110364917  | -9.12917623636430  | h |
| 1.48492790111003  | -12.53943620919174 | -9.07065357499600  | h |
| -2.16920578692546 | -12.72546302873193 | -4.15837302941160  | h |
| -6.03975594698493 | -10.41179166610388 | -11.31366021020063 | c |
| -3.63109840572958 | -13.93981651933131 | -9.52797185032840  | c |
| -5.01246294836671 | -5.97787262670044  | -8.71919073235294  | h |
| -2.15631351040683 | -5.49001547676780  | -7.05929145122739  | h |
| -1.64092687785778 | -7.10459845672012  | -10.90798238612818 | c |
| -4.92241027423282 | -8.60931346099198  | -3.62346164341245  | h |
| -7.20536484790709 | -9.08963456694792  | -6.04870080565960  | h |
| -5.66355638879091 | -11.72733580695398 | -4.71559148602878  | h |
| -0.69975997852497 | -10.70572893759084 | -12.87887562044519 | h |
| -5.97507068291882 | -11.33689702819201 | -13.18211628451694 | h |
| -7.73073993648794 | -11.14195760295905 | -10.33258889370969 | h |
| -6.33300411372911 | -8.37940746282769  | -11.64060064634240 | h |
| -1.95457712515562 | -14.69554171738699 | -8.56705960421243  | h |
| -5.31084461353803 | -14.57505140476656 | -8.46122692322580  | h |
| -3.74857163813329 | -14.82961622533447 | -11.41146337401679 | h |
| -2.74779647128511 | -6.45490387354006  | -12.54689737510868 | h |
| 0.15333826636280  | -6.04506696305114  | -10.93571181725857 | h |
| 0.61726209763656  | 10.21614123457803  | 6.43311194577045   | c |
| 3.34258253380835  | 9.47367187363363   | 7.33235706230096   | c |
| -0.81318475182921 | 10.57336617423881  | 8.98287982885189   | c |
| 0.57760336317302  | 12.54118528025761  | 5.05464527319777   | o |
| 3.64114852029180  | 11.05993822702531  | 9.82496520420371   | c |
| 3.11078432414150  | 6.76424234279334   | 8.40124390957932   | c |
| 5.36585223018008  | 9.74723619454620   | 5.32036641406019   | c |
| 1.18802751698887  | 9.97124608557889   | 10.99301909239159  | c |
| -2.47712235408395 | 9.33319110364917   | 9.12917623636430   | h |
| -1.48492790111003 | 12.53943620919174  | 9.07065357499600   | h |
| 2.16920578692546  | 12.72546302873193  | 4.15837302941160   | h |
| 6.03975594698493  | 10.41179166610388  | 11.31366021020063  | c |
| 3.63109840572958  | 13.93981651933131  | 9.52797185032840   | c |
| 5.01246294836671  | 5.97787262670044   | 8.71919073235294   | h |
| 2.15631351040683  | 5.49001547676780   | 7.05929145122739   | h |
| -1.64092687785778 | 7.10459845672012   | 10.90798238612818  | c |
| 4.92241027423282  | 8.60931346099198   | 3.62346164341245   | h |
| 7.20536484790709  | 9.08963456694792   | 6.04870080565960   | h |
| 5.66355638879091  | 11.72733580695398  | 4.71559148602878   | h |
| 0.69975997852497  | 10.70572893759084  | 12.87887562044519  | h |
| 5.97507068291882  | 11.33689702819201  | 13.18211628451694  | h |
| 7.73073993648794  | 11.14195760295905  | 10.33258889370969  | h |
| 6.33300411372911  | 8.37940746282769   | 11.64060064634240  | h |
| 1.95457712515562  | 14.69554171738699  | 8.56705960421243   | h |
| 5.31084461353803  | 14.57505140476656  | 8.46122692322580   | h |
| 3.74857163813329  | 14.82961622533447  | 11.41146337401679  | h |
| 2.74779647128511  | 6.45490387354006   | 12.54689737510868  | h |
| -0.15333826636280 | 6.04506696305114   | 10.93571181725857  | h |

**[Au<sub>3</sub>Ag(C<sub>2</sub>C<sub>10</sub>H<sub>17</sub>O)<sub>3</sub>(Ph<sub>2</sub>P(CH<sub>2</sub>)<sub>2</sub>PPh(CH<sub>2</sub>)<sub>2</sub>PPh<sub>2</sub>)]<sub>2</sub><sup>2+</sup> (5)**

|                   |                   |                  |    |
|-------------------|-------------------|------------------|----|
| 4.95826578927249  | 8.57838405953169  | 2.51974973283300 | au |
| -4.52870773286003 | 9.28267682367692  | 3.70553904927018 | au |
| -2.30894930155352 | 4.17139567034724  | 0.33928805336450 | au |
| 2.30894930155352  | -4.17139567034724 | 0.33928805336450 | au |

|                    |                    |                   |    |
|--------------------|--------------------|-------------------|----|
| 4.52870773286003   | -9.28267682367692  | 3.70553904927018  | au |
| -4.95826578927249  | -8.57838405953169  | 2.51974973283300  | au |
| -7.80470881432903  | -5.65256366942274  | 4.06717292872423  | p  |
| -4.70113666575400  | 2.33715531931881   | 3.50278627489271  | p  |
| -3.48790720178632  | 7.83236332089223   | 7.68780364023570  | p  |
| 3.48790720178632   | -7.83236332089223  | 7.68780364023570  | p  |
| 4.70113666575400   | -2.33715531931881  | 3.50278627489271  | p  |
| 7.80470881432903   | 5.65256366942274   | 4.06717292872423  | p  |
| 2.98746105813440   | 11.37763017165791  | 0.90121641792720  | c  |
| 2.40501112701080   | 13.24713001483644  | -0.38416468466151 | c  |
| 0.48762191062120   | -5.71336533022569  | -2.59661563627533 | c  |
| -0.39947186691494  | -6.58138241766242  | -4.57125106756220 | c  |
| 5.18749799159352   | -10.64639959693105 | 0.23871172786823  | c  |
| 5.68304185473908   | -11.51506381383135 | -1.86504351947336 | c  |
| -5.18749799159352  | 10.64639959693105  | 0.23871172786823  | c  |
| -5.68304185473908  | 11.51506381383135  | -1.86504351947336 | c  |
| -0.48762191062120  | 5.71336533022569   | -2.59661563627533 | c  |
| 0.39947186691494   | 6.58138241766242   | -4.57125106756220 | c  |
| -2.98746105813440  | -11.37763017165791 | 0.90121641792720  | c  |
| -2.40501112701080  | -13.24713001483644 | -0.38416468466151 | c  |
| 6.58699026411838   | 2.50997248323508   | 5.00586306008819  | c  |
| 5.17555600630421   | 1.09228859787226   | 2.93346187979113  | c  |
| 3.36452335452804   | -2.41844309949043  | 6.73922111600984  | c  |
| 1.84364391845763   | -4.74077465086155  | 7.54377325057560  | c  |
| -1.84364391845763  | 4.74077465086155   | 7.54377325057560  | c  |
| -3.36452335452804  | 2.41844309949043   | 6.73922111600984  | c  |
| -5.17555600630421  | -1.09228859787226  | 2.93346187979113  | c  |
| -6.58699026411838  | -2.50997248323508  | 5.00586306008819  | c  |
| -10.30382251113607 | -5.02466420065702  | 1.77926322433425  | c  |
| -11.57450183943475 | -2.70327894234943  | 1.63019578947468  | c  |
| -11.00967244377504 | -6.99148513008929  | 0.14720189293886  | c  |
| -13.51699204834878 | -2.36684048611342  | -0.11890420472721 | c  |
| -12.96318103615813 | -6.65160331501865  | -1.58405453076422 | c  |
| -14.21781427967461 | -4.33735101604131  | -1.72177223899367 | c  |
| -9.36138174627901  | -6.69243056676934  | 6.96695622739415  | c  |
| -11.85354433752459 | -6.00182723242189  | 7.53363617728887  | c  |
| -7.98718964037412  | -8.16320049288926  | 8.68876102086632  | c  |
| -12.94693922187356 | -6.76077028802742  | 9.80704241999006  | c  |
| -9.08543125078440  | -8.90416686236988  | 10.96518178367605 | c  |
| -11.56454433491193 | -8.20541527725917  | 11.52596397319749 | c  |
| 10.30382251113607  | 5.02466420065702   | 1.77926322433425  | c  |
| 11.57450183943475  | 2.70327894234943   | 1.63019578947468  | c  |
| 11.00967244377504  | 6.99148513008929   | 0.14720189293886  | c  |
| 13.51699204834878  | 2.36684048611342   | -0.11890420472721 | c  |
| 12.96318103615813  | 6.65160331501865   | -1.58405453076422 | c  |
| 14.21781427967461  | 4.33735101604131   | -1.72177223899367 | c  |
| 9.36138174627901   | 6.69243056676934   | 6.96695622739415  | c  |
| 11.85354433752459  | 6.00182723242189   | 7.53363617728887  | c  |
| 7.98718964037412   | 8.16320049288926   | 8.68876102086632  | c  |
| 12.94693922187356  | 6.76077028802742   | 9.80704241999006  | c  |
| 9.08543125078440   | 8.90416686236988   | 10.96518178367605 | c  |
| 11.56454433491193  | 8.20541527725917   | 11.52596397319749 | c  |
| -1.15532632303332  | 9.86151000961407   | 9.23181808504607  | c  |
| -0.90748992108750  | 9.95169232596767   | 11.86788148361023 | c  |
| 0.41469581906072   | 11.36925494962790  | 7.72134917135508  | c  |
| 0.89825069097323   | 11.51935971342881  | 12.97179918582733 | c  |
| 2.22568892971718   | 12.92677257973635  | 8.83510763751772  | c  |
| 2.46564221142416   | 13.00757848380015  | 11.45889867664266 | c  |
| -6.06476519653684  | 7.45202704780504   | 9.93624854032679  | c  |
| -5.97684307605688  | 5.70690734842059   | 11.93039749021053 | c  |
| -8.18050278743569  | 9.02572910771347   | 9.68676079276470  | c  |
| -7.97615691986509  | 5.53916082397186   | 13.63893862493740 | c  |
| -10.16589068871375 | 8.86921133993478   | 11.41062259582822 | c  |
| -10.06930059617421 | 7.12347089797161   | 13.38370092053410 | c  |
| 1.15532632303332   | -9.86151000961407  | 9.23181808504607  | c  |
| 0.90748992108750   | -9.95169232596767  | 11.86788148361023 | c  |
| 0.41469581906072   | -11.36925494962790 | 7.72134917135508  | c  |
| -0.89825069097323  | -11.51935971342881 | 12.97179918582733 | c  |
| -2.22568892971718  | -12.92677257973635 | 8.83510763751772  | c  |
| -2.46564221142416  | -13.00757848380015 | 11.45889867664266 | c  |
| 6.06476519653684   | -7.45202704780504  | 9.93624854032679  | c  |
| 5.97684307605688   | -5.70690734842059  | 11.93039749021053 | c  |
| 8.18050278743569   | -9.02572910771347  | 9.68676079276470  | c  |
| 7.97615691986509   | -5.53916082397186  | 13.63893862493740 | c  |
| 10.16589068871375  | -8.86921133993478  | 11.41062259582822 | c  |
| 10.06930059617421  | -7.12347089797161  | 13.38370092053410 | c  |
| 7.93231468614835   | -3.54925091342700  | 3.64489704775123  | c  |

|                    |                    |                   |   |
|--------------------|--------------------|-------------------|---|
| 9.44195335303020   | -3.44327058190548  | 5.82132351336239  | c |
| 8.98529342256818   | -4.46554962726705  | 1.38900105285475  | c |
| 11.95978238570475  | -4.21867888612906  | 5.73177520478850  | c |
| 11.50379713135752  | -5.22860111719155  | 1.30577491786407  | c |
| 12.99645533082078  | -5.10314677545615  | 3.47568955848093  | c |
| -7.93231468614835  | 3.54925091342700   | 3.64489704775123  | c |
| -9.44195335303020  | 3.44327058190548   | 5.82132351336239  | c |
| -8.98529342256818  | 4.46554962726705   | 1.38900105285475  | c |
| -11.95978238570475 | 4.21867888612906   | 5.73177520478850  | c |
| -11.50379713135752 | 5.22860111719155   | 1.30577491786407  | c |
| -12.99645533082078 | 5.10314677545615   | 3.47568955848093  | c |
| -14.96917053692940 | 5.71835447911029   | 3.41382441861270  | h |
| 0.25837250574631   | -5.06924306191192  | 6.22200040275579  | h |
| 0.99456792144627   | -4.38527834787303  | 9.41850229218378  | h |
| -5.35943103898662  | -2.87212714583847  | 6.65364805032563  | h |
| -8.22445309501363  | -1.42685125782002  | 5.71258767813978  | h |
| -3.30232525851891  | -1.94078171837752  | 2.55946036256584  | h |
| -6.20300742032648  | -1.17359219235534  | 1.11638069895767  | h |
| 4.87563425035000   | -2.00772605885818  | 8.11459314092997  | h |
| 2.07945833093030   | -0.77109819453283  | 6.79107679450419  | h |
| -4.87563425035000  | 2.00772605885818   | 8.11459314092997  | h |
| -2.07945833093030  | 0.77109819453283   | 6.79107679450419  | h |
| -0.25837250574631  | 5.06924306191192   | 6.22200040275579  | h |
| -0.99456792144627  | 4.38527834787303   | 9.41850229218378  | h |
| 3.30232525851891   | 1.94078171837752   | 2.55946036256584  | h |
| 6.20300742032648   | 1.17359219235534   | 1.11638069895767  | h |
| 8.22445309501363   | 1.42685125782002   | 5.71258767813978  | h |
| 5.35943103898662   | 2.87212714583847   | 6.65364805032563  | h |
| -11.07342491058509 | -1.12144789059934  | 2.86418037308757  | h |
| -10.01879486265294 | -8.80656102839769  | 0.22727281183593  | h |
| -14.48823417118878 | -0.54544470738066  | -0.22266174754732 | h |
| -13.50050549734643 | -8.20305928266486  | -2.83938782031941 | h |
| -15.74486743538123 | -4.06719818669468  | -3.08868363171700 | h |
| -12.96402816836063 | -4.89768131085996  | 6.18269104833353  | h |
| -6.05639184450822  | -8.76363520505796  | 8.24049549349726  | h |
| -14.90132100881993 | -6.23607908946105  | 10.22939534426617 | h |
| -8.00182144138599  | -10.05974232600412 | 12.29358914762757 | h |
| -12.43429934354657 | -8.80970628527921  | 13.30145212911543 | h |
| 11.07342491058509  | 1.12144789059934   | 2.86418037308757  | h |
| 10.01879486265294  | 8.80656102839769   | 0.22727281183593  | h |
| 14.48823417118878  | 0.54544470738066   | -0.22266174754732 | h |
| 13.50050549734643  | 8.20305928266486   | -2.83938782031941 | h |
| 15.74486743538123  | 4.06719818669468   | -3.08868363171700 | h |
| 12.96402816836063  | 4.89768131085996   | 6.18269104833353  | h |
| 6.05639184450822   | 8.76363520505796   | 8.24049549349726  | h |
| 14.90132100881993  | 6.23607908946105   | 10.22939534426617 | h |
| 8.00182144138599   | 10.05974232600412  | 12.29358914762757 | h |
| 12.43429934354657  | 8.80970628527921   | 13.30145212911543 | h |
| -2.15733097389367  | 8.83661342611946   | 13.08014129564745 | h |
| 0.21857049698245   | 11.35995366560210  | 5.66036480805024  | h |
| 1.05902406045079   | 11.60241504535359  | 15.03108747073962 | h |
| 3.42480219548817   | 14.10661741682392  | 7.63320640972080  | h |
| 3.85724400139437   | 14.26281091462804  | 12.33299712936312 | h |
| -4.33918632363493  | 4.46870876965922   | 12.18346993999887 | h |
| -8.27696460652090  | 10.38090637771800  | 8.12578596125480  | h |
| -7.89150906932713  | 4.17567212025373   | 15.19051724678707 | h |
| -11.80027012933753 | 10.11782705675848  | 11.20680533840364 | h |
| -11.62893507467133 | 7.00029828075688   | 14.73522578246035 | h |
| 2.15733097389367   | -8.83661342611946  | 13.08014129564745 | h |
| -0.21857049698245  | -11.35995366560210 | 5.66036480805024  | h |
| -1.05902406045079  | -11.60241504535359 | 15.03108747073962 | h |
| -3.42480219548817  | -14.10661741682392 | 7.63320640972080  | h |
| -3.85724400139437  | -14.26281091462804 | 12.33299712936312 | h |
| 4.33918632363493   | -4.46870876965922  | 12.18346993999887 | h |
| 8.27696460652090   | -10.38090637771800 | 8.12578596125480  | h |
| 7.89150906932713   | -4.17567212025373  | 15.19051724678707 | h |
| 11.80027012933753  | -10.11782705675848 | 11.20680533840364 | h |
| 11.62893507467133  | -7.00029828075688  | 14.73522578246035 | h |
| 8.68092617309436   | -2.78675035837778  | 7.62651460004747  | h |
| 7.81859109516154   | -4.61067535497874  | -0.31449162198798 | h |
| 13.11076609323624  | -4.14089834559511  | 7.44671930915256  | h |
| 12.29066477827037  | -5.95305943222417  | -0.46235961742270 | h |
| 14.96917053692940  | -5.71835447911029  | 3.41382441861270  | h |
| -8.68092617309436  | 2.78675035837778   | 7.62651460004747  | h |
| -7.81859109516154  | 4.61067535497874   | -0.31449162198798 | h |
| -13.11076609323624 | 4.14089834559511   | 7.44671930915256  | h |
| -12.29066477827037 | 5.95305943222417   | -0.46235961742270 | h |

|                    |                    |                    |   |
|--------------------|--------------------|--------------------|---|
| -2.12221167298168  | -15.41468860681412 | -2.13437762672396  | c |
| -0.81298169267280  | -17.79291340757153 | -0.93465401120555  | c |
| -4.76926621411909  | -16.49382078165944 | -2.88546766935038  | c |
| -1.90706076621747  | -20.01859310593374 | -2.56228538502899  | c |
| -2.16244417557113  | -18.24008179057528 | 1.61939933770036   | c |
| -4.68100645998205  | -19.25724858060171 | -2.02279839732831  | c |
| -6.33175099509610  | -15.44000261409512 | -2.00339945354968  | h |
| -4.96328663610292  | -16.30552377221272 | -4.94722645981659  | h |
| -1.08976668170257  | -19.63150171995095 | 2.73713532012244   | h |
| -2.23814378856530  | -16.49679336760309 | 2.75712962117941   | h |
| -4.80640059527338  | -19.24558263208700 | 0.87727618009246   | c |
| -6.12452353729899  | -20.44729837694054 | -2.93804115582848  | h |
| -5.15173059997068  | -21.15208027087770 | 1.63958834937699   | h |
| -6.35305275887004  | -18.03181650660375 | 1.57003912068317   | h |
| 2.12221167298168   | 15.41468860681412  | -2.13437762672396  | c |
| 0.81298169267280   | 17.79291340757153  | -0.93465401120555  | c |
| 4.76926621411909   | 16.49382078165944  | -2.88546766935038  | c |
| 1.90706076621747   | 20.01859310593374  | -2.56228538502899  | c |
| 2.16244417557113   | 18.24008179057528  | 1.61939933770036   | c |
| 4.68100645998205   | 19.25724858060171  | -2.02279839732831  | c |
| 6.33175099509610   | 15.44000261409512  | -2.00339945354968  | h |
| 4.96328663610292   | 16.30552377221272  | -4.94722645981659  | h |
| 1.08976668170257   | 19.63150171995095  | 2.73713532012244   | h |
| 2.23814378856530   | 16.49679336760309  | 2.75712962117941   | h |
| 4.80640059527338   | 19.24558263208700  | 0.87727618009246   | c |
| 6.12452353729899   | 20.44729837694054  | -2.93804115582848  | h |
| 5.15173059997068   | 21.15208027087770  | 1.63958834937699   | h |
| 6.35305275887004   | 18.03181650660375  | 1.57003912068317   | h |
| 6.24213243090571   | -12.61996268974877 | -4.36560124736185  | c |
| 8.18529891002551   | -10.99990868565151 | -5.92549945530126  | c |
| 7.62217562224006   | -15.22079375045464 | -4.20082893064282  | c |
| 9.35683806130004   | -12.99777361346822 | -7.77582742861790  | c |
| 10.43447730095663  | -10.50875282726436 | -4.12341422760934  | c |
| 10.12606738914894  | -14.79267269563240 | -5.59423930539941  | c |
| 6.43302163507307   | -16.63749841697919 | -5.15024899074890  | h |
| 11.68476571617865  | -9.06495789593632  | -4.95776199338719  | h |
| 9.78991566137783   | -9.76335107417189  | -2.28905162369923  | h |
| 11.76629375655405  | -13.10219563409579 | -3.89893045105182  | c |
| 11.04765062955648  | -16.56490037247456 | -6.18293506173639  | h |
| 13.73681028152127  | -13.02444407043497 | -4.56727180562484  | h |
| 11.82110616194158  | -13.80881301430784 | -1.93902226169521  | h |
| -6.24213243090571  | 12.61996268974877  | -4.36560124736185  | c |
| -8.18529891002551  | 10.99990868565151  | -5.92549945530126  | c |
| -7.62217562224006  | 15.22079375045464  | -4.20082893064282  | c |
| -9.35683806130004  | 12.99777361346822  | -7.77582742861790  | c |
| -10.43447730095663 | 10.50875282726436  | -4.12341422760934  | c |
| -10.12606738914894 | 14.79267269563240  | -5.59423930539941  | c |
| -6.43302163507307  | 16.63749841697919  | -5.15024899074890  | h |
| -11.68476571617865 | 9.06495789593632   | -4.95776199338719  | h |
| -9.78991566137783  | 9.76335107417189   | -2.28905162369923  | h |
| -11.76629375655405 | 13.10219563409579  | -3.89893045105182  | c |
| -11.04765062955648 | 16.56490037247456  | -6.18293506173639  | h |
| -13.73681028152127 | 13.02444407043497  | -4.56727180562484  | h |
| -11.82110616194158 | 13.80881301430784  | -1.93902226169521  | h |
| 1.38206660405787   | 7.62594194487077   | -6.96667661312743  | c |
| 4.35149199635919   | 7.63550239221892   | -7.07974516481598  | c |
| 0.64323077279592   | 5.97467072091890   | -9.39873269198898  | c |
| 4.76924954419967   | 7.77900385162471   | -9.94625737251266  | c |
| 5.29252474358654   | 4.93115156076243   | -6.49925482529827  | c |
| 3.28173120149804   | 5.37398175701942   | -10.54246698857226 | c |
| 6.78825730334721   | 7.64262008697781   | -10.45579220108286 | h |
| 3.98660725519513   | 9.51316205074915   | -10.78781392212568 | h |
| 7.33959485092125   | 4.99139075679376   | -6.10356739937578  | h |
| 4.36873353476982   | 4.13850473818469   | -4.80665818035065  | h |
| 4.71761050239182   | 3.43344431935076   | -8.94152629994368  | c |
| 3.14032888929756   | 4.8559969900501    | -12.55439163028264 | h |
| 6.47809236701981   | 2.89582608976666   | -9.92048908956886  | h |
| 3.65579101305004   | 1.67461079701992   | -8.61192665277799  | h |
| -1.38206660405787  | -7.62594194487077  | -6.96667661312743  | c |
| -4.35149199635919  | -7.63550239221892  | -7.07974516481598  | c |
| -0.64323077279592  | -5.97467072091890  | -9.39873269198898  | c |
| -4.76924954419967  | -7.77900385162471  | -9.94625737251266  | c |
| -5.29252474358654  | -4.93115156076243  | -6.49925482529827  | c |
| -3.28173120149804  | -5.37398175701942  | -10.54246698857226 | c |
| -6.78825730334721  | -7.64262008697781  | -10.45579220108286 | h |
| -3.98660725519513  | -9.51316205074915  | -10.78781392212568 | h |
| -7.33959485092125  | -4.99139075679376  | -6.10356739937578  | h |



|                   |                    |                     |   |
|-------------------|--------------------|---------------------|---|
| -4.36873353476982 | -4.13850473818469  | -4.80665818035065   | h |
| -4.71761050239182 | -3.43344431935076  | -8.94152629994368   | c |
| -3.14032888929756 | -4.85599969900501  | -12.554339163028264 | h |
| -6.47809236701981 | -2.89582608976666  | -9.92048908956886   | h |
| -3.65579101305004 | -1.67461079701992  | -8.61192665277799   | h |
| 0.92714625537684  | 14.49844193590415  | -4.35443397047998   | o |
| -0.92733511433624 | 14.47266562423412  | -4.22527157644439   | h |
| 0.36463079707712  | 10.08656750591669  | -7.27008449338678   | o |
| 1.19333899420330  | 11.31045887396946  | -6.14537278746748   | h |
| -0.92714625537684 | -14.49844193590415 | -4.35443397047998   | o |
| 0.92733511433624  | -14.47266562423412 | -4.22527157644439   | h |
| -0.36463079707712 | -10.08656750591669 | -7.27008449338678   | o |
| -1.19333899420330 | -11.31045887396946 | -6.14537278746748   | h |
| -7.90061096453124 | 15.84205872766038  | -2.23477398728557   | h |
| 7.90061096453124  | -15.84205872766038 | -2.23477398728557   | h |
| -3.89100854732597 | 13.00786732905122  | -5.60981736301909   | o |
| -3.12669937915304 | 11.42548338941415  | -6.20182029012887   | h |
| 3.89100854732597  | -13.00786732905122 | -5.60981736301909   | o |
| 3.12669937915304  | -11.42548338941415 | -6.20182029012887   | h |
| -2.02975079354867 | 17.58421716304651  | -0.70351129112390   | c |
| -2.96606976520516 | 17.45036684236354  | -2.56076449466854   | h |
| -2.58028590126579 | 15.90708584810670  | 0.41397149299063    | h |
| -2.80803567368340 | 19.26557580541748  | 0.25447149279297    | h |
| 5.60741029693986  | 9.65395076348402   | -5.48769734890260   | c |
| 5.05879346269169  | 11.57938105857105  | -6.07034684637577   | h |
| 5.14187524065504  | 9.43611683140745   | -3.46494921817590   | h |
| 7.68052397793542  | 9.52305747759394   | -5.69092372800854   | h |
| 2.02975079354867  | -17.58421716304651 | -0.70351129112390   | c |
| 2.96606976520516  | -17.45036684236354 | -2.56076449466854   | h |
| 2.58028590126579  | -15.90708584810670 | 0.41397149299063    | h |
| 2.80803567368340  | -19.26557580541748 | 0.25447149279297    | h |
| 7.07173895854176  | -8.61739957898347  | -7.04465808269834   | c |
| 6.20276930469457  | -7.42187443343366  | -5.56584503869564   | h |
| 8.54614845395258  | -7.48742920919879  | -7.99298564903531   | h |
| 5.61103436389481  | -9.03772853779326  | -8.46946103113174   | h |
| -5.60741029693986 | -9.65395076348402  | -5.48769734890260   | c |
| -5.05879346269169 | -11.57938105857105 | -6.07034684637577   | h |
| -5.14187524065504 | -9.43611683140745  | -3.46494921817590   | h |
| -7.68052397793542 | -9.52305747759394  | -5.69092372800854   | h |
| -7.07173895854176 | 8.61739957898347   | -7.04465808269834   | c |
| -6.20276930469457 | 7.42187443343366   | -5.56584503869564   | h |
| -8.54614845395258 | 7.48742920919879   | -7.99298564903531   | h |
| -5.61103436389481 | 9.03772853779326   | -8.46946103113174   | h |
| 1.20095258320811  | 20.01213719780962  | -5.36959624862635   | c |
| -0.83891092397406 | 20.39063343890751  | -5.60641047508737   | h |
| 2.21996971832393  | 21.54894664688733  | -6.34801830401264   | h |
| 1.61059595600199  | 18.22670632963156  | -6.34280310169273   | h |
| 1.19686263389001  | 22.63962411507914  | -1.55525463688353   | c |
| 2.26006844280499  | 24.10270226471648  | -2.59605563268119   | h |
| -0.83062123564030 | 23.01884016633737  | -1.87142851640142   | h |
| 1.57783036542488  | 22.92156800739526  | 0.46970189554771    | h |
| -1.19686263389001 | -22.63962411507914 | -1.55525463688353   | c |
| -2.26006844280499 | -24.10270226471648 | -2.59605563268119   | h |
| 0.83062123564030  | -23.01884016633737 | -1.87142851640142   | h |
| -1.57783036542488 | -22.92156800739526 | 0.46970189554771    | h |
| -1.20095258320811 | -20.01213719780962 | -5.36959624862635   | c |
| -1.61059595600199 | -18.22670632963156 | -6.34280310169273   | h |
| 0.83891092397406  | -20.39063343890751 | -5.60641047508737   | h |
| -2.21996971832393 | -21.54894664688733 | -6.34801830401264   | h |
| -0.90154108776437 | 3.61865659938755   | -8.76762208957090   | c |
| -0.05980020190941 | 2.46265725028573   | -7.25641990777211   | h |
| -2.82065777587621 | 4.14338583568823   | -8.14200455174551   | h |
| -1.08718079054269 | 2.42314837818802   | -10.46874685570262  | h |
| -0.86659629033880 | 7.52495898117684   | -11.32164296611444  | c |
| -1.26975248427750 | 6.32186008697838   | -12.97849281075851  | h |
| -2.68585554765320 | 8.15575711576074   | -10.53848035981136  | h |
| 0.14629265822034  | 9.21638021399083   | -11.97699865225968  | h |
| 0.86659629033880  | -7.52495898117684  | -11.32164296611444  | c |
| 2.68585554765320  | -8.15575711576074  | -10.53848035981136  | h |
| -0.14629265822034 | -9.21638021399083  | -11.97699865225968  | h |
| 1.26975248427750  | -6.32186008697838  | -12.97849281075851  | h |
| 0.90154108776437  | -3.61865659938755  | -8.76762208957090   | c |
| 0.05980020190941  | -2.46265725028573  | -7.25641990777211   | h |
| 2.82065777587621  | -4.14338583568823  | -8.14200455174551   | h |
| 1.08718079054269  | -2.42314837818802  | -10.46874685570262  | h |
| 7.54398975344781  | -14.17722154521272 | -9.69970908676456   | c |
| 6.93777867404725  | -12.75079711209303 | -11.09846836762555  | h |

|                    |                    |                    |    |
|--------------------|--------------------|--------------------|----|
| 8.53372839284219   | -15.68120793426169 | -10.75629602422855 | h  |
| 5.82502719613172   | -14.98089548601672 | -8.86330127146100  | h  |
| 11.60049774095361  | -11.98077257446538 | -9.29974192417204  | c  |
| 12.50939740866325  | -13.54531635869021 | -10.33888449209936 | h  |
| 10.94970818352192  | -10.60057751898368 | -10.72336679324996 | h  |
| 13.07564619198247  | -11.05806544354635 | -8.16012393099158  | h  |
| -11.60049774095361 | 11.98077257446538  | -9.29974192417204  | c  |
| -12.50939740866325 | 13.54531635869021  | -10.33888449209936 | h  |
| -10.94970818352192 | 10.60057751898368  | -10.72336679324996 | h  |
| -13.07564619198247 | 11.05806544354635  | -8.16012393099158  | h  |
| -7.54398975344781  | 14.17722154521272  | -9.69970908676456  | c  |
| -5.82502719613172  | 14.98089548601672  | -8.86330127146100  | h  |
| -6.93777867404725  | 12.75079711209303  | -11.09846836762555 | h  |
| -8.53372839284219  | 15.68120793426169  | -10.75629602422855 | h  |
| 0.82688580775150   | -9.81796421405805  | -0.64731593756950  | ag |
| -0.82688580775150  | 9.81796421405805   | -0.64731593756950  | ag |

**[Au<sub>3</sub>Ag(C<sub>2</sub>C<sub>9</sub>H<sub>19</sub>O)<sub>3</sub>(Ph<sub>2</sub>P(CH<sub>2</sub>)<sub>2</sub>PPh(CH<sub>2</sub>)<sub>2</sub>PPh<sub>2</sub>)]<sup>+</sup> (6)**

|                   |                   |                    |    |
|-------------------|-------------------|--------------------|----|
| 2.01018167743851  | 1.00346557552693  | -5.07130129540581  | au |
| 4.30462002488725  | -0.25204317903838 | 0.00000000000000   | au |
| 2.01018167743851  | 1.00346557552693  | 5.07130129540581   | au |
| -2.38316448874610 | 0.68201046970757  | 0.00000000000000   | ag |
| 6.03223161737116  | 1.40467891432075  | 6.72994742015966   | p  |
| 6.80758396522994  | 3.33256981631718  | 0.00000000000000   | p  |
| 6.03223161737116  | 1.40467891432075  | -6.72994742015966  | p  |
| 7.91145616102954  | 3.99105250632043  | 5.28571122082729   | c  |
| 9.04491198165291  | 3.45629545141677  | 2.68709886008858   | c  |
| 9.04491198165291  | 3.45629545141677  | -2.68709886008858  | c  |
| 7.91145616102954  | 3.99105250632043  | -5.28571122082729  | c  |
| -1.69038170187903 | 1.10798735373743  | -4.21839643840693  | c  |
| 2.51436496633377  | -3.57087144605087 | 0.00000000000000   | c  |
| -1.69038170187903 | 1.10798735373743  | 4.21839643840693   | c  |
| -4.01609120699586 | 1.35808926834601  | 4.30330253767419   | c  |
| -4.01609120699586 | 1.35808926834601  | -4.30330253767419  | c  |
| 1.43685061108761  | -5.62214083405076 | 0.00000000000000   | c  |
| 5.84429958214430  | 2.32685441720936  | -10.05349290495040 | c  |
| 5.82838861961482  | 0.46040799851975  | -11.93287615342801 | c  |
| 5.54060039974832  | 4.86553280800056  | -10.74454941951828 | c  |
| 5.54539591515204  | 1.13105656147801  | -14.46357853014605 | c  |
| 5.26167297298614  | 5.52583095411904  | -13.27940227525658 | c  |
| 5.26673973846478  | 3.66260605531000  | -15.14273649035358 | c  |
| 8.18345319626691  | -1.28424825887680 | -6.65836812834710  | c  |
| 10.49626252903753 | -1.16624764007889 | -7.95504481076892  | c  |
| 7.57695325754955  | -3.44880750155606 | -5.26529081699658  | c  |
| 12.17396658822653 | -3.18963364378718 | -7.85027967970447  | c  |
| 9.26608893288323  | -5.47360392190132 | -5.16913198609998  | c  |
| 11.55884930355223 | -5.34673477934350 | -6.45682475624494  | c  |
| 8.18345319626691  | -1.28424825887680 | 6.65836812834710   | c  |
| 10.49626252903753 | -1.16624764007889 | 7.95504481076892   | c  |
| 7.57695325754955  | -3.44880750155606 | 5.26529081699658   | c  |
| 12.17396658822653 | -3.18963364378718 | 7.85027967970447   | c  |
| 9.26608893288323  | -5.47360392190132 | 5.16913198609998   | c  |
| 11.55884930355223 | -5.34673477934350 | 6.45682475624494   | c  |
| 5.84429958214430  | 2.32685441720936  | 10.05349290495040  | c  |
| 5.54060039974832  | 4.86553280800056  | 10.74454941951828  | c  |
| 5.82838861961482  | 0.46040799851975  | 11.93287615342801  | c  |
| 5.26167297298614  | 5.52583095411904  | 13.27940227525658  | c  |
| 5.54539591515204  | 1.13105656147801  | 14.46357853014605  | c  |
| 5.26673973846478  | 3.66260605531000  | 15.14273649035358  | c  |
| -6.73145876203487 | 1.80535157779946  | -4.80672758139630  | c  |
| -7.41721903724017 | 1.10713566506138  | -7.56190893421493  | c  |
| -7.44393056333349 | 4.59081877423104  | -4.18488384600349  | c  |
| -6.73145876203487 | 1.80535157779946  | 4.80672758139630   | c  |
| -7.44393056333349 | 4.59081877423104  | 4.18488384600349   | c  |
| -7.41721903724017 | 1.10713566506138  | 7.56190893421493   | c  |
| 0.25302858433596  | -8.14642743368421 | 0.00000000000000   | c  |
| 1.12402002117594  | -9.68627969386249 | 2.35173556637241   | c  |
| 1.12402002117594  | -9.68627969386249 | -2.35173556637241  | c  |
| -2.40190039521177 | -7.76752852066327 | 0.00000000000000   | o  |
| -8.03428904425803 | 0.27481778664940  | -3.03317914358739  | o  |
| -8.03428904425803 | 0.27481778664940  | 3.03317914358739   | o  |
| -6.59430936401084 | 6.93532519753179  | 5.72210010767848   | c  |
| -7.97458184564299 | 7.18546630911615  | 8.26156365980682   | c  |

|                    |                    |                    |   |
|--------------------|--------------------|--------------------|---|
| -3.73921678252342  | 7.02272353267094   | 6.18056289328157   | c |
| -7.33356773873666  | 9.23466205411339   | 4.10858113035509   | c |
| -6.59430936401084  | 6.9353251975310784 | -5.72210010767848  | c |
| -3.73921678252342  | 7.02272353267094   | -6.18056289328157  | c |
| -7.97458184564299  | 7.18546630911615   | -8.26156365980682  | c |
| -7.33356773873666  | 9.23466205411339   | -4.10858113035509  | c |
| -7.71923339311619  | -1.68171957877506  | 8.38561285319698   | c |
| -5.43827227217889  | -3.30269284497461  | 7.67319208475392   | c |
| -7.97578803460580  | -1.63569121438353  | 11.27664035623528  | c |
| -10.12596145260057 | -2.87927030083545  | 7.29418217242632   | c |
| -7.71923339311619  | -1.68171957877506  | -8.38561285319698  | c |
| -7.97578803460580  | -1.63569121438353  | -11.27664035623528 | c |
| -5.43827227217889  | -3.30269284497461  | -7.67319208475392  | c |
| -10.12596145260057 | -2.87927030083545  | -7.29418217242632  | c |
| 0.11826594817375   | -9.11665363820243  | 5.03503200808880   | c |
| 0.47385134072654   | -6.35853493444383  | 5.81787280837832   | c |
| -2.68220490233140  | -9.82615370923666  | 5.30365739708540   | c |
| 1.64634293440206   | -10.80031666728736 | 6.83973412767551   | c |
| 0.11826594817375   | -9.11665363820243  | -5.03503200808880  | c |
| -2.68220490233140  | -9.82615370923666  | -5.30365739708540  | c |
| 0.47385134072654   | -6.35853493444383  | -5.81787280837832  | c |
| 1.64634293440206   | -10.80031666728736 | -6.83973412767551  | c |
| 1.44829954547280   | -12.82168519524092 | -6.35157240189528  | h |
| 9.46359180248410   | 4.40362660286443   | -6.61946316502747  | h |
| 6.70071449564896   | 5.68926798141031   | -5.21497800460027  | h |
| 10.44022709129087  | 4.95112233125502   | -2.26137305249371  | h |
| 10.08506154941960  | 1.64463701062832   | -2.68752781265036  | h |
| 10.08506154941960  | 1.64463701062832   | 2.26137305249371   | h |
| 10.44022709129087  | 4.95112233125502   | 2.26137305249371   | h |
| 6.70071449564896   | 5.68926798141031   | 5.21497800460027   | h |
| 9.46359180248410   | 4.40362660286443   | 6.61946316502747   | h |
| 6.04532158838039   | -1.53177175679132  | -11.42322938224437 | h |
| 5.50304550956774   | 6.35628074046136   | -9.31309724473428  | h |
| 5.54351316580229   | -0.34026086743823  | -15.91562055054566 | h |
| 5.03379436817634   | 7.51379380650361   | -13.79836899881934 | h |
| 5.04720479660263   | 4.18469816224365   | -17.13079207204390 | h |
| 10.98107391039426  | 0.49952998747236   | -9.08350451619230  | h |
| 5.78420779799201   | -3.56004140972537  | -4.23937789521921  | h |
| 13.96772972703629  | -3.09066230182569  | -8.87322567579506  | h |
| 8.76879999798264   | -7.16025674527753  | -4.08224925732953  | h |
| 12.87668833963691  | -6.93843724309196  | -6.38717576852857  | h |
| 10.98107391039426  | 0.49952998747236   | 9.08350451619230   | h |
| 5.78420779799201   | -3.56004140972537  | 4.23937789521921   | h |
| 13.96772972703629  | -3.09066230182569  | 8.87322567579506   | h |
| 8.76879999798264   | -7.16025674527753  | 4.08224925732953   | h |
| 12.87668833963691  | -6.93843724309196  | 6.38717576852857   | h |
| 5.50304550956774   | 6.35628074046136   | 9.31309724473428   | h |
| 6.04532158838039   | -1.53177175679132  | 11.42322938224437  | h |
| 5.03379436817634   | 7.51379380650361   | 13.79836899881934  | h |
| 5.54351316580229   | -0.34026086743823  | 15.91562055054566  | h |
| 5.04720479660263   | 4.18469816224365   | 17.13079207204390  | h |
| -9.22322081949789  | 2.06992392874063   | -7.98821512774323  | h |
| -5.98996252228048  | 1.99979134174289   | -8.79428863160089  | h |
| -6.84278341148224  | 4.85897684654678   | -2.20311553252443  | h |
| -9.53897122101298  | 4.62055428250225   | -4.15300976263909  | h |
| -6.84278341148224  | 4.85897684654678   | 2.20311553252443   | h |
| -9.53897122101298  | 4.62055428250225   | 4.15300976263909   | h |
| -5.98996252228048  | 1.99979134174289   | 8.79428863160089   | h |
| -9.22322081949789  | 2.06992392874063   | 7.98821512774323   | h |
| 0.66194941537270   | -11.68993766589890 | 1.96323429592675   | h |
| 3.21115194584029   | -9.59002697623497  | 2.38580553024466   | h |
| 3.21115194584029   | -9.59002697623497  | -2.38580553024466  | h |
| 0.66194941537270   | -11.68993766589890 | -1.96323429592675  | h |
| -3.20135436090304  | -9.41781601151201  | 0.00000000000000   | h |
| -9.83109539238513  | 0.57761615690899   | -3.23938582876341  | h |
| -9.83109539238513  | 0.57761615690899   | 3.23938582876341   | h |
| -10.04372220993548 | 7.03816310362497   | 8.02120475139261   | h |
| -7.38332782941093  | 5.75082909899610   | 9.64694291341345   | h |
| -7.57483484055352  | 9.05357964748338   | 9.10324639901594   | h |
| -2.66773709504309  | 6.87158917223272   | 4.39632181051882   | h |
| -3.22668009909908  | 8.83073191293852   | 7.09275092653222   | h |
| -3.09075919582198  | 5.47955211413366   | 7.42196279827400   | h |
| -6.86345162230318  | 11.01250609376772  | 5.09591293266700   | h |
| -6.32975015685781  | 9.23316344048654   | 2.27727847518531   | h |
| -9.38301250652700  | 9.25664427047077   | 3.70794635300652   | h |
| -2.66773709504309  | 6.87158917223272   | -4.39632181051882  | h |
| -3.09075919582198  | 5.47955211413366   | -7.42196279827400  | h |

|                    |                    |                    |   |
|--------------------|--------------------|--------------------|---|
| -3.22668009909908  | 8.83073191293852   | -7.09275092653222  | h |
| -10.04372220993548 | 7.03816310362497   | -8.02120475139261  | h |
| -7.57483484055352  | 9.05357964748338   | -9.10324639901594  | h |
| -7.38332782941093  | 5.75082909899610   | -9.64694291341345  | h |
| -6.86345162230318  | 11.01250609376772  | -5.09591293266700  | h |
| -9.38301250652700  | 9.25664427047077   | -3.70794635300652  | h |
| -6.32975015685781  | 9.23316344048654   | -2.27727847518531  | h |
| -5.22772727151772  | -3.47199124312516  | 5.60744722301450   | h |
| -3.66519782979572  | -2.50561068484276  | 8.43067694465672   | h |
| -5.65847499545138  | -5.22822565573023  | 8.45130804732048   | h |
| -9.59601203229048  | -0.46372382864466  | 11.88141040072500  | h |
| -8.27770969357807  | -3.56294503878385  | 12.01941347961812  | h |
| -6.25676087755615  | -0.86756976773333  | 12.18007242582238  | h |
| -10.46404635503728 | -4.74010982930347  | 8.17838282118051   | h |
| -11.80629235909502 | -1.69732418742128  | 7.68427684665904   | h |
| -9.97599985645525  | -3.17953188838264  | 5.24103913296609   | h |
| -9.59601203229048  | -0.46372382864466  | -11.88141040072500 | h |
| -6.25676087755615  | -0.86756976773333  | -12.18007242582238 | h |
| -8.27770969357807  | -3.56294503878385  | -12.01941347961812 | h |
| -5.22772727151772  | -3.47199124312516  | -5.60744722301450  | h |
| -5.65847499545138  | -5.22822565573023  | -8.45130804732048  | h |
| -3.66519782979572  | -2.50561068484276  | -8.43067694465672  | h |
| -10.46404635503728 | -4.74010982930347  | -8.17838282118051  | h |
| -9.97599985645525  | -3.17953188838264  | -5.24103913296609  | h |
| -11.80629235909502 | -1.69732418742128  | -7.68427684665904  | h |
| 2.47681175860890   | -5.79182431544935  | 5.69792284298287   | h |
| -0.62657295132548  | -5.06192577445201  | 4.61718685018130   | h |
| -0.14954002734849  | -6.09327378398717  | 7.79341483814401   | h |
| -3.03274292624400  | -11.78483935983227 | 4.66041744302428   | h |
| -3.26097481872466  | -9.72202448983714  | 7.30728389450054   | h |
| -3.90602474597304  | -8.53740568309946  | 4.22271947999949   | h |
| 0.99020410908036   | -10.55723777165197 | 8.80681329764982   | h |
| 1.44829954547280   | -12.82168519524092 | 6.35157240189528   | h |
| 3.67984453554313   | -10.32516310188587 | 6.78343690243544   | h |
| -3.03274292624400  | -11.78483935983227 | -4.66041744302428  | h |
| -3.90602474597304  | -8.53740568309946  | -4.22271947999949  | h |
| -3.26097481872466  | -9.72202448983714  | -7.30728389450054  | h |
| 2.47681175860890   | -5.79182431544935  | -5.69792284298287  | h |
| -0.14954002734849  | -6.09327378398717  | -7.79341483814401  | h |
| -0.62657295132548  | -5.06192577445201  | -4.61718685018130  | h |
| 0.99020410908036   | -10.55723777165197 | -8.80681329764982  | h |
| 3.67984453554313   | -10.32516310188587 | -6.78343690243544  | h |
| 5.29027045075474   | 6.42794242697128   | 0.00000000000000   | c |
| 2.65026134625089   | 6.60430330621033   | 0.00000000000000   | c |
| 6.73777007834482   | 8.65234799738889   | 0.00000000000000   | c |
| 1.47497189950979   | 8.96517806113252   | 0.00000000000000   | c |
| 1.50414365164071   | 4.88179673911403   | 0.00000000000000   | h |
| 5.55937228274156   | 11.00532829495378  | 0.00000000000000   | c |
| 8.80624504263050   | 8.57065523858653   | 0.00000000000000   | h |
| 2.92465831966677   | 11.16319395786601  | 0.00000000000000   | c |
| -0.58898616761930  | 9.07825931158544   | 0.00000000000000   | h |
| 6.70284528155852   | 12.72752685640858  | 0.00000000000000   | h |
| 2.00186609982919   | 13.01303114543611  | 0.00000000000000   | h |
